# Supplementary material for: An environmentally benign multi-component reaction: regioselective synthesis of fluorinated 2-aminopyridines using diverse properties of the nitro group
Source: Royal Society of Chemistry journal article supplement (doi:10.1039/c8gc03698e), 2019-01-01
Supplement: c8gc03698e1.pdf [file c8gc03698e1.pdf]

# An environmentally benign multi-component reaction: Regioselective synthesis of fluorinated 2-aminopyridines using diverse properties of nitro group

Xuan-Xuan Du, Quan-Xing Zi, Yu-Meng Wu, Yi Jin,\* Jun Lin\* and Sheng-Jiao Yan\*

## Supporting Information

### Table of Contents

|                                                                                                                    |     |
|--------------------------------------------------------------------------------------------------------------------|-----|
| X-ray Structure and Data of <b>4a</b> & <b>5s</b> .....                                                            | S4  |
| <b>Figure S1.</b> X-Ray crystal structure of <b>4a</b> . .....                                                     | S4  |
| <b>Table S1.</b> Crystal data and structure refinement for <b>4a</b> .....                                         | S4  |
| <b>Figure S2.</b> X-Ray crystal structure of <b>5s</b> . .....                                                     | S5  |
| <b>Table S2.</b> Crystal data and structure refinement for <b>5s</b> .....                                         | S5  |
| <b>Figure S3.</b> <sup>1</sup> H NMR (500 MHz, DMSO- <i>d</i> <sub>6</sub> ) spectra of compound <b>4a</b> .....   | S6  |
| <b>Figure S4.</b> <sup>13</sup> C NMR (125 MHz, DMSO- <i>d</i> <sub>6</sub> ) spectra of compound <b>4a</b> .....  | S7  |
| <b>Figure S5.</b> <sup>1</sup> H NMR (600 MHz, CDCl <sub>3</sub> ) spectra of compound <b>4b</b> .....             | S8  |
| <b>Figure S6.</b> <sup>13</sup> C NMR (150 MHz, CDCl <sub>3</sub> ) spectra of compound <b>4b</b> .....            | S9  |
| <b>Figure S7.</b> <sup>19</sup> F NMR (564 MHz, CDCl <sub>3</sub> ) spectra of compound <b>4b</b> .....            | S10 |
| <b>Figure S8.</b> <sup>1</sup> H NMR (500 MHz, DMSO- <i>d</i> <sub>6</sub> ) spectra of compound <b>4c</b> .....   | S11 |
| <b>Figure S9.</b> <sup>13</sup> C NMR (125 MHz, DMSO- <i>d</i> <sub>6</sub> ) spectra of compound <b>4c</b> .....  | S12 |
| <b>Figure S10.</b> <sup>1</sup> H NMR (500 MHz, DMSO- <i>d</i> <sub>6</sub> ) spectra of compound <b>4d</b> .....  | S13 |
| <b>Figure S11.</b> <sup>13</sup> C NMR (125 MHz, DMSO- <i>d</i> <sub>6</sub> ) spectra of compound <b>4d</b> ..... | S14 |
| <b>Figure S12.</b> <sup>1</sup> H NMR (500 MHz, DMSO- <i>d</i> <sub>6</sub> ) spectra of compound <b>4e</b> .....  | S15 |
| <b>Figure S13.</b> <sup>13</sup> C NMR (125 MHz, DMSO- <i>d</i> <sub>6</sub> ) spectra of compound <b>4e</b> ..... | S16 |
| <b>Figure S14.</b> <sup>1</sup> H NMR (500 MHz, DMSO- <i>d</i> <sub>6</sub> ) spectra of compound <b>4f</b> .....  | S17 |
| <b>Figure S15.</b> <sup>13</sup> C NMR (125 MHz, DMSO- <i>d</i> <sub>6</sub> ) spectra of compound <b>4f</b> ..... | S18 |
| <b>Figure S16.</b> <sup>1</sup> H NMR (500 MHz, DMSO- <i>d</i> <sub>6</sub> ) spectra of compound <b>4g</b> .....  | S19 |
| <b>Figure S17.</b> <sup>13</sup> C NMR (125 MHz, DMSO- <i>d</i> <sub>6</sub> ) spectra of compound <b>4g</b> ..... | S20 |
| <b>Figure S18.</b> <sup>1</sup> H NMR (500 MHz, DMSO- <i>d</i> <sub>6</sub> ) spectra of compound <b>4h</b> .....  | S21 |
| <b>Figure S19.</b> <sup>13</sup> C NMR (125 MHz, DMSO- <i>d</i> <sub>6</sub> ) spectra of compound <b>4h</b> ..... | S22 |
| <b>Figure S20.</b> <sup>1</sup> H NMR (500 MHz, DMSO- <i>d</i> <sub>6</sub> ) spectra of compound <b>4i</b> .....  | S23 |

|                    |                                                                                       |     |
|--------------------|---------------------------------------------------------------------------------------|-----|
| <b>Figure S21.</b> | $^{13}\text{C}$ NMR (125 MHz, $\text{DMSO-}d_6$ ) spectra of compound <b>4i</b> ..... | S24 |
| <b>Figure S22.</b> | $^1\text{H}$ NMR (600 MHz, $\text{CDCl}_3$ ) spectra of compound <b>4j</b> .....      | S25 |
| <b>Figure S23.</b> | $^{13}\text{C}$ NMR (150 MHz, $\text{CDCl}_3$ ) spectra of compound <b>4j</b> .....   | S26 |
| <b>Figure S24.</b> | $^1\text{H}$ NMR (500 MHz, $\text{DMSO-}d_6$ ) spectra of compound <b>4k</b> .....    | S27 |
| <b>Figure S25.</b> | $^{13}\text{C}$ NMR (125 MHz, $\text{DMSO-}d_6$ ) spectra of compound <b>4k</b> ..... | S28 |
| <b>Figure S26.</b> | $^1\text{H}$ NMR (500 MHz, $\text{DMSO-}d_6$ ) spectra of compound <b>4l</b> .....    | S29 |
| <b>Figure S27.</b> | $^{13}\text{C}$ NMR (125 MHz, $\text{DMSO-}d_6$ ) spectra of compound <b>4l</b> ..... | S30 |
| <b>Figure S28.</b> | $^1\text{H}$ NMR (500 MHz, $\text{DMSO-}d_6$ ) spectra of compound <b>4m</b> .....    | S31 |
| <b>Figure S29.</b> | $^{13}\text{C}$ NMR (125 MHz, $\text{DMSO-}d_6$ ) spectra of compound <b>4m</b> ..... | S32 |
| <b>Figure S30.</b> | $^1\text{H}$ NMR (500 MHz, $\text{DMSO-}d_6$ ) spectra of compound <b>4n</b> .....    | S33 |
| <b>Figure S31.</b> | $^{13}\text{C}$ NMR (125 MHz, $\text{DMSO-}d_6$ ) spectra of compound <b>4n</b> ..... | S34 |
| <b>Figure S32.</b> | $^1\text{H}$ NMR (500 MHz, $\text{DMSO-}d_6$ ) spectra of compound <b>4o</b> .....    | S35 |
| <b>Figure S33.</b> | $^{13}\text{C}$ NMR (125 MHz, $\text{DMSO-}d_6$ ) spectra of compound <b>4o</b> ..... | S36 |
| <b>Figure S34.</b> | $^1\text{H}$ NMR (500 MHz, $\text{DMSO-}d_6$ ) spectra of compound <b>4p</b> .....    | S37 |
| <b>Figure S35.</b> | $^{13}\text{C}$ NMR (125 MHz, $\text{DMSO-}d_6$ ) spectra of compound <b>4p</b> ..... | S38 |
| <b>Figure S36.</b> | $^1\text{H}$ NMR (500 MHz, $\text{DMSO-}d_6$ ) spectra of compound <b>4q</b> .....    | S39 |
| <b>Figure S37.</b> | $^{13}\text{C}$ NMR (125 MHz, $\text{DMSO-}d_6$ ) spectra of compound <b>4q</b> ..... | S40 |
| <b>Figure S38.</b> | $^1\text{H}$ NMR (500 MHz, $\text{DMSO-}d_6$ ) spectra of compound <b>5a</b> .....    | S41 |
| <b>Figure S39.</b> | $^{13}\text{C}$ NMR (125 MHz, $\text{DMSO-}d_6$ ) spectra of compound <b>5a</b> ..... | S42 |
| <b>Figure S40.</b> | $^1\text{H}$ NMR (500 MHz, $\text{DMSO-}d_6$ ) spectra of compound <b>5b</b> .....    | S43 |
| <b>Figure S41.</b> | $^{13}\text{C}$ NMR (125 MHz, $\text{DMSO-}d_6$ ) spectra of compound <b>5b</b> ..... | S44 |
| <b>Figure S42.</b> | $^1\text{H}$ NMR (600 MHz, $\text{CDCl}_3$ ) spectra of compound <b>5c</b> .....      | S45 |
| <b>Figure S43.</b> | $^{13}\text{C}$ NMR (150 MHz, $\text{CDCl}_3$ ) spectra of compound <b>5c</b> .....   | S46 |
| <b>Figure S44.</b> | $^1\text{H}$ NMR (500 MHz, $\text{DMSO-}d_6$ ) spectra of compound <b>5d</b> .....    | S47 |
| <b>Figure S45.</b> | $^{13}\text{C}$ NMR (125MHz, $\text{DMSO-}d_6$ ) spectra of compound <b>5d</b> .....  | S48 |
| <b>Figure S46.</b> | $^1\text{H}$ NMR (500 MHz, $\text{DMSO-}d_6$ ) spectra of compound <b>5e</b> .....    | S49 |
| <b>Figure S47.</b> | $^{13}\text{C}$ NMR (125 MHz, $\text{DMSO-}d_6$ ) spectra of compound <b>5e</b> ..... | S50 |
| <b>Figure S48.</b> | $^1\text{H}$ NMR (600 MHz, $\text{CDCl}_3$ ) spectra of compound <b>5f</b> .....      | S51 |
| <b>Figure S49.</b> | $^{13}\text{C}$ NMR (150 MHz, $\text{CDCl}_3$ ) spectra of compound <b>5f</b> .....   | S52 |
| <b>Figure S50.</b> | $^1\text{H}$ NMR (500 MHz, $\text{CDCl}_3$ ) spectra of compound <b>5g</b> .....      | S53 |
| <b>Figure S51.</b> | $^{13}\text{C}$ NMR (125 MHz, $\text{CDCl}_3$ ) spectra of compound <b>5g</b> .....   | S54 |
| <b>Figure S52.</b> | $^1\text{H}$ NMR (500 MHz, $\text{DMSO-}d_6$ ) spectra of compound <b>5h</b> .....    | S55 |
| <b>Figure S53.</b> | $^{13}\text{C}$ NMR (125 MHz, $\text{DMSO-}d_6$ ) spectra of compound <b>5h</b> ..... | S56 |
| <b>Figure S54.</b> | $^1\text{H}$ NMR (500 MHz, $\text{DMSO-}d_6$ ) spectra of compound <b>5i</b> .....    | S57 |
| <b>Figure S55.</b> | $^{13}\text{C}$ NMR (125 MHz, $\text{DMSO-}d_6$ ) spectra of compound <b>5i</b> ..... | S58 |
| <b>Figure S56.</b> | $^1\text{H}$ NMR (500 MHz, $\text{CDCl}_3$ ) spectra of compound <b>5j</b> .....      | S59 |
| <b>Figure S57.</b> | $^{13}\text{C}$ NMR (125 MHz, $\text{CDCl}_3$ ) spectra of compound <b>5j</b> .....   | S60 |
| <b>Figure S58.</b> | $^1\text{H}$ NMR (600 MHz, $\text{CDCl}_3$ ) spectra of compound <b>5k</b> .....      | S61 |
| <b>Figure S59.</b> | $^{13}\text{C}$ NMR (150 MHz, $\text{CDCl}_3$ ) spectra of compound <b>5k</b> .....   | S62 |

|                    |                                                                                     |     |
|--------------------|-------------------------------------------------------------------------------------|-----|
| <b>Figure S60.</b> | $^1\text{H}$ NMR (500 MHz, DMSO- $d_6$ ) spectra of compound <b>5l</b> .....        | S63 |
| <b>Figure S61.</b> | $^{13}\text{C}$ NMR (125 MHz, DMSO- $d_6$ ) spectra of compound <b>5l</b> .....     | S64 |
| <b>Figure S62.</b> | $^1\text{H}$ NMR (500 MHz, DMSO- $d_6$ ) spectra of compound <b>5m</b> .....        | S65 |
| <b>Figure S63.</b> | $^{13}\text{C}$ NMR (125 MHz, DMSO- $d_6$ ) spectra of compound <b>5m</b> .....     | S66 |
| <b>Figure S64.</b> | $^1\text{H}$ NMR (500 MHz, DMSO- $d_6$ ) spectra of compound <b>5n</b> .....        | S67 |
| <b>Figure S65.</b> | $^{13}\text{C}$ NMR (125 MHz, DMSO- $d_6$ ) spectra of compound <b>5n</b> .....     | S68 |
| <b>Figure S66.</b> | $^1\text{H}$ NMR (500 MHz, DMSO- $d_6$ ) spectra of compound <b>5o</b> .....        | S69 |
| <b>Figure S67.</b> | $^{13}\text{C}$ NMR (125 MHz, DMSO- $d_6$ ) spectra of compound <b>5o</b> .....     | S70 |
| <b>Figure S68.</b> | $^1\text{H}$ NMR (500 MHz, DMSO- $d_6$ ) spectra of compound <b>5p</b> .....        | S71 |
| <b>Figure S69.</b> | $^{13}\text{C}$ NMR (125 MHz, DMSO- $d_6$ ) spectra of compound <b>5p</b> .....     | S72 |
| <b>Figure S70.</b> | $^1\text{H}$ NMR (500 MHz, DMSO- $d_6$ ) spectra of compound <b>5q</b> .....        | S73 |
| <b>Figure S71.</b> | $^{13}\text{C}$ NMR (125 MHz, DMSO- $d_6$ ) spectra of compound <b>5q</b> .....     | S74 |
| <b>Figure S72.</b> | $^1\text{H}$ NMR (500 MHz, $\text{CDCl}_3$ ) spectra of compound <b>5r</b> .....    | S75 |
| <b>Figure S73.</b> | $^{13}\text{C}$ NMR (125 MHz, $\text{CDCl}_3$ ) spectra of compound <b>5r</b> ..... | S76 |
| <b>Figure S74.</b> | $^1\text{H}$ NMR (500 MHz, DMSO- $d_6$ ) spectra of compound <b>5s</b> .....        | S77 |
| <b>Figure S75.</b> | $^{13}\text{C}$ NMR (125 MHz, DMSO- $d_6$ ) spectra of compound <b>5s</b> .....     | S78 |
| <b>Figure S76.</b> | $^1\text{H}$ NMR (500 MHz, DMSO- $d_6$ ) spectra of compound <b>5t</b> .....        | S79 |
| <b>Figure S77.</b> | $^{13}\text{C}$ NMR (125 MHz, DMSO- $d_6$ ) spectra of compound <b>5t</b> .....     | S80 |
| <b>Figure S78.</b> | $^1\text{H}$ NMR (500 MHz, DMSO- $d_6$ ) spectra of compound <b>5u</b> .....        | S81 |
| <b>Figure S79.</b> | $^{13}\text{C}$ NMR (125 MHz, DMSO- $d_6$ ) spectra of compound <b>5u</b> .....     | S82 |
| <b>Figure S80.</b> | $^1\text{H}$ NMR (500 MHz, DMSO- $d_6$ ) spectra of compound <b>5v</b> .....        | S83 |
| <b>Figure S81.</b> | $^{13}\text{C}$ NMR (125 MHz, DMSO- $d_6$ ) spectra of compound <b>5v</b> .....     | S84 |
| <b>Figure S82.</b> | $^1\text{H}$ NMR (600 MHz, DMSO- $d_6$ ) spectra of compound <b>5w</b> .....        | S85 |
| <b>Figure S83.</b> | $^{13}\text{C}$ NMR (150 MHz, DMSO- $d_6$ ) spectra of compound <b>5w</b> .....     | S86 |
| <b>Figure S84.</b> | $^1\text{H}$ NMR (600 MHz, DMSO- $d_6$ ) spectra of compound <b>5x</b> .....        | S87 |
| <b>Figure S85.</b> | $^{13}\text{C}$ NMR (150 MHz, DMSO- $d_6$ ) spectra of compound <b>5x</b> .....     | S88 |
| <b>Figure S86.</b> | $^1\text{H}$ NMR (600 MHz, DMSO- $d_6$ ) spectra of compound <b>5f'</b> .....       | S89 |
| <b>Figure S87.</b> | $^{13}\text{C}$ NMR (150MHz, DMSO- $d_6$ ) spectra of compound <b>5f'</b> .....     | S90 |
| <b>Figure S88.</b> | HPLC of the reaction mixture.....                                                   | S91 |
| <b>Figure S89.</b> | HRMS of intermediate <b>11</b> .....                                                | S92 |
| <b>Figure S90.</b> | HRMS of intermediate <b>12/13</b> .....                                             | S93 |
| <b>Figure S91.</b> | HRMS of compound <b>4h</b> .....                                                    | S94 |
| <b>Figure S92.</b> | HRMS of compound <b>5h</b> .....                                                    | S95 |

## X-ray Structure and Data of 4a & 5s

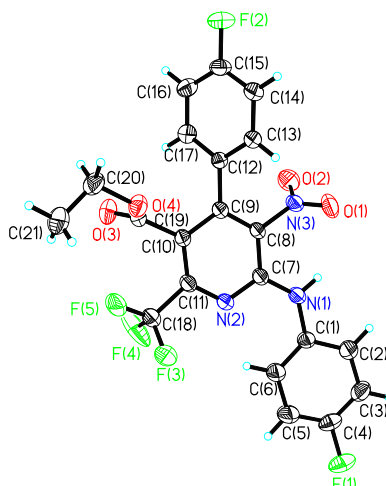

**Figure S1.** X-Ray crystal structure of **4a**; ellipsoids are drawn at the 30% probability level.

**Table S1.** Crystal data and structure refinement for **4a**

|                                   |                                                                                                                                      |
|-----------------------------------|--------------------------------------------------------------------------------------------------------------------------------------|
| Identification code               | 1                                                                                                                                    |
| Empirical formula                 | $C_{21}H_{14}F_5N_3O_4$                                                                                                              |
| Formula weight                    | 467.35                                                                                                                               |
| Temperature                       | 293(2) K                                                                                                                             |
| Wavelength                        | 0.71073 Å                                                                                                                            |
| Crystal system, space group       | Triclinic, P -1                                                                                                                      |
| Unit cell dimensions              | a = 8.2387(14) Å    alpha = 78.884(2) deg.<br>b = 9.1226(15) Å    beta = 77.335(2) deg.<br>c = 15.647(3) Å    gamma = 63.875(2) deg. |
| Volume                            | 1023.9(3) Å <sup>3</sup>                                                                                                             |
| Z, Calculated density             | 2, 1.516 Mg/m <sup>3</sup>                                                                                                           |
| Absorption coefficient            | 0.136 mm <sup>-1</sup>                                                                                                               |
| F(000)                            | 476                                                                                                                                  |
| Crystal size                      | 0.300 x 0.250 x 0.230 mm                                                                                                             |
| Theta range for data collection   | 2.502 to 24.995 deg.                                                                                                                 |
| Limiting indices                  | -9 ≤ h ≤ 9, -10 ≤ k ≤ 10, -18 ≤ l ≤ 18                                                                                               |
| Reflections collected / unique    | 7987 / 3571 [R(int) = 0.0226]                                                                                                        |
| Completeness to theta = 25.242    | 96.8 %                                                                                                                               |
| Absorption correction             | Semi-empirical from equivalents                                                                                                      |
| Max. and min. transmission        | 0.969 and 0.960                                                                                                                      |
| Refinement method                 | Full-matrix least-squares on F <sup>2</sup>                                                                                          |
| Data / restraints / parameters    | 3571 / 0 / 300                                                                                                                       |
| Goodness-of-fit on F <sup>2</sup> | 1.094                                                                                                                                |
| Final R indices [I > 2σ(I)]       | R1 = 0.0501, wR2 = 0.1497                                                                                                            |
| R indices (all data)              | R1 = 0.0658, wR2 = 0.1619                                                                                                            |
| Extinction coefficient            | 0.023(5)                                                                                                                             |
| Largest diff. peak and hole       | 0.432 and -0.275 eÅ <sup>-3</sup>                                                                                                    |

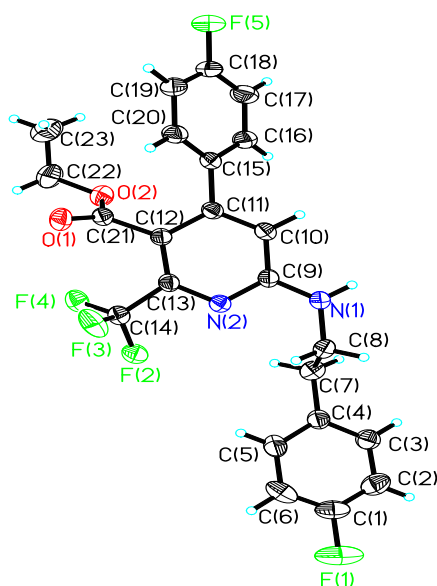

**Figure S2.** X-Ray crystal structure of **5s**; ellipsoids are drawn at the 30% probability level.

**Table S2.** Crystal data and structure refinement for **5s**

|                                                             |                                                                                                                                            |
|-------------------------------------------------------------|--------------------------------------------------------------------------------------------------------------------------------------------|
| Identification code                                         | 1                                                                                                                                          |
| Empirical formula                                           | $C_{23}H_{19}F_5N_2O_2$                                                                                                                    |
| Formula weight                                              | 450.40                                                                                                                                     |
| Temperature                                                 | 293(2) K                                                                                                                                   |
| Wavelength                                                  | 0.71073 Å                                                                                                                                  |
| Crystal system, space group                                 | Triclinic, $P -1$                                                                                                                          |
| Unit cell dimensions                                        | $a = 8.6308(16)$ Å $\alpha = 78.895(2)$ deg.<br>$b = 9.4049(18)$ Å $\beta = 81.887(2)$ deg.<br>$c = 13.955(3)$ Å $\gamma = 74.726(2)$ deg. |
| Volume                                                      | $1067.4(3)$ Å <sup>3</sup>                                                                                                                 |
| Z, Calculated density                                       | 2, 1.401 Mg/m <sup>3</sup>                                                                                                                 |
| Absorption coefficient                                      | 0.120 mm <sup>-1</sup>                                                                                                                     |
| F(000)                                                      | 464                                                                                                                                        |
| Crystal size                                                | 0.350 x 0.300 x 0.200 mm                                                                                                                   |
| Theta range for data collection                             | 1.494 to 25.150 deg.                                                                                                                       |
| Limiting indices                                            | $-10 \leq h \leq 10$ , $-11 \leq k \leq 11$ , $-16 \leq l \leq 16$                                                                         |
| Reflections collected / unique                              | 8534 / 3809 [R(int) = 0.0261]                                                                                                              |
| Completeness to theta = 25.242                              | 98.3 %                                                                                                                                     |
| Absorption correction                                       | Semi-empirical from equivalents                                                                                                            |
| Max. and min. transmission                                  | 0.976 and 0.959                                                                                                                            |
| Refinement method                                           | Full-matrix least-squares on F <sup>2</sup>                                                                                                |
| Data / restraints / parameters                              | 3809 / 0 / 290                                                                                                                             |
| Goodness-of-fit on F <sup>2</sup>                           | 1.022                                                                                                                                      |
| Final R indices [I > 2σ(I)]                                 | R1 = 0.0512, wR2 = 0.1386                                                                                                                  |
| R indices (all data)                                        | R1 = 0.0861, wR2 = 0.1679                                                                                                                  |
| Extinction coefficient                                      | n/a                                                                                                                                        |
| Largest diff. peak and hole                                 | 0.383 and -0.235 e.Å <sup>-3</sup>                                                                                                         |
| Symmetry transformations used to generate equivalent atoms: |                                                                                                                                            |

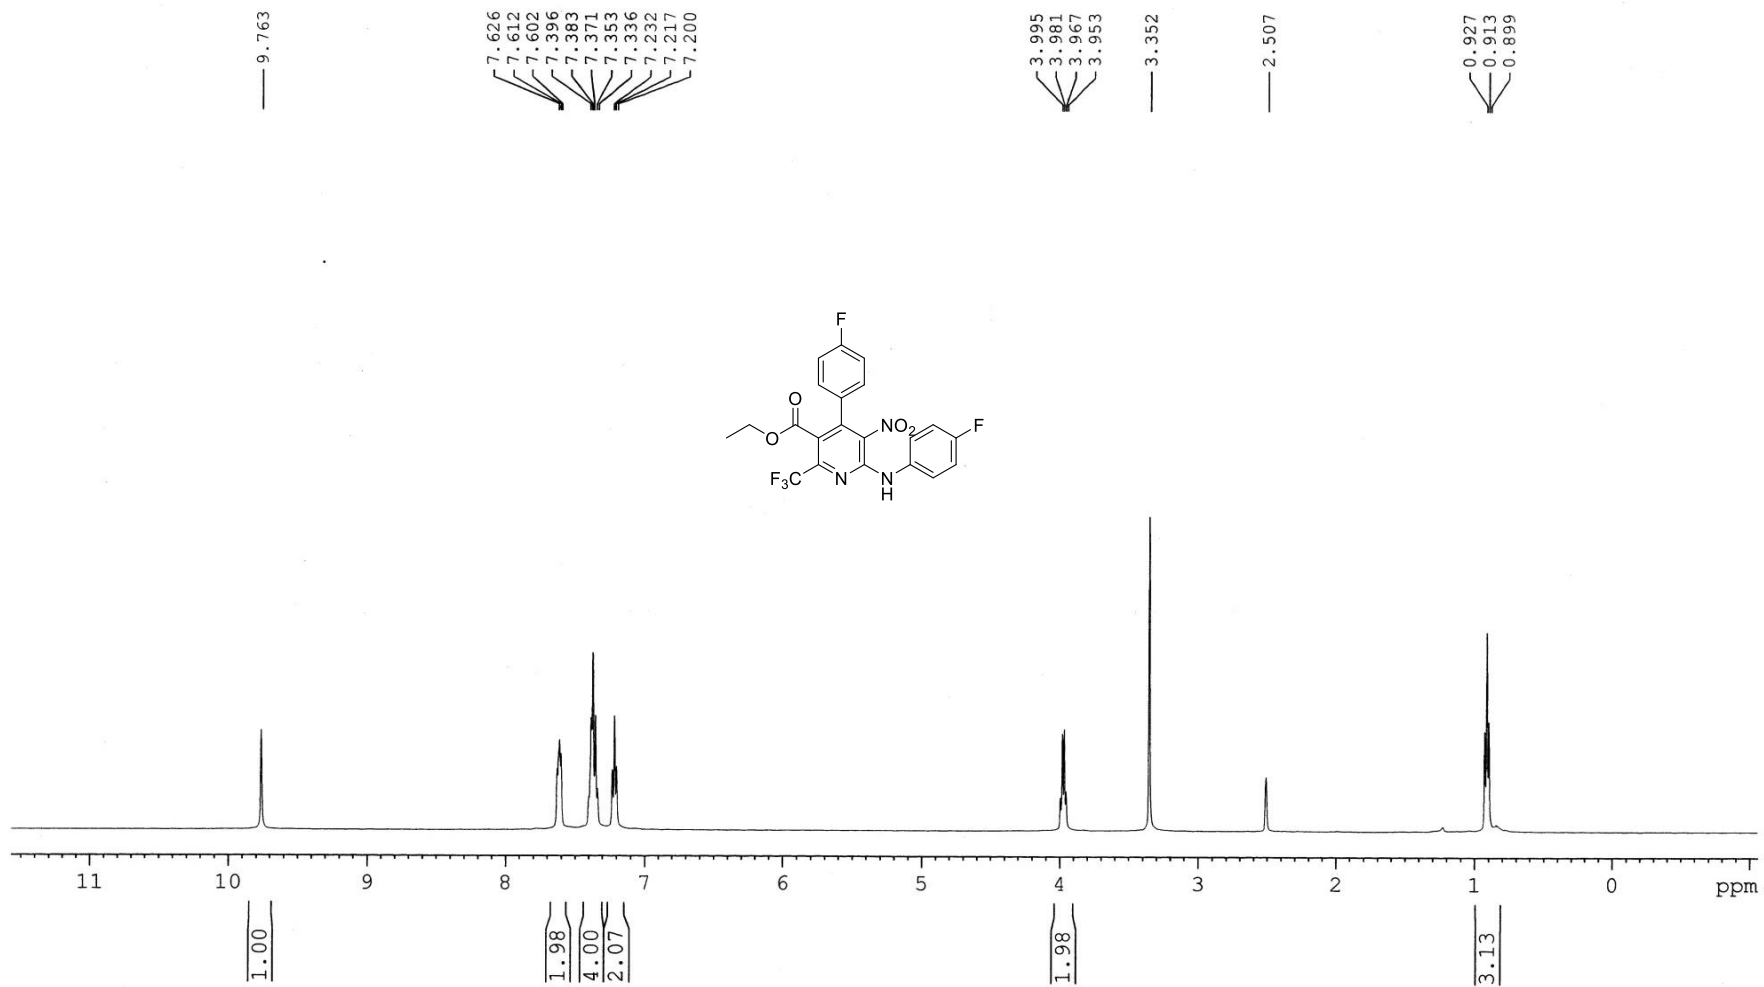

**Figure S3.** <sup>1</sup>H NMR (500 MHz, DMSO-*d*<sub>6</sub>) spectra of compound **4a**

DEPT135

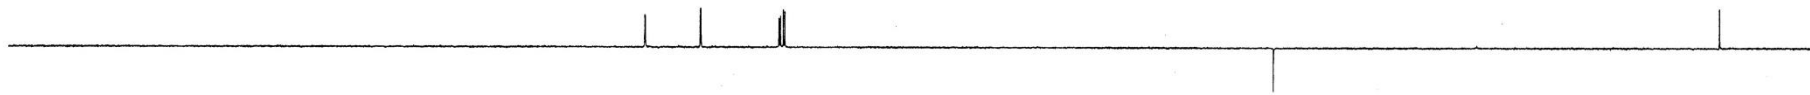

YUNNAN UNIVERSITY AVIIHD500 DXX-3-6-1  
Jun27-2017-duxuanxuan  
C13CPD DMSO

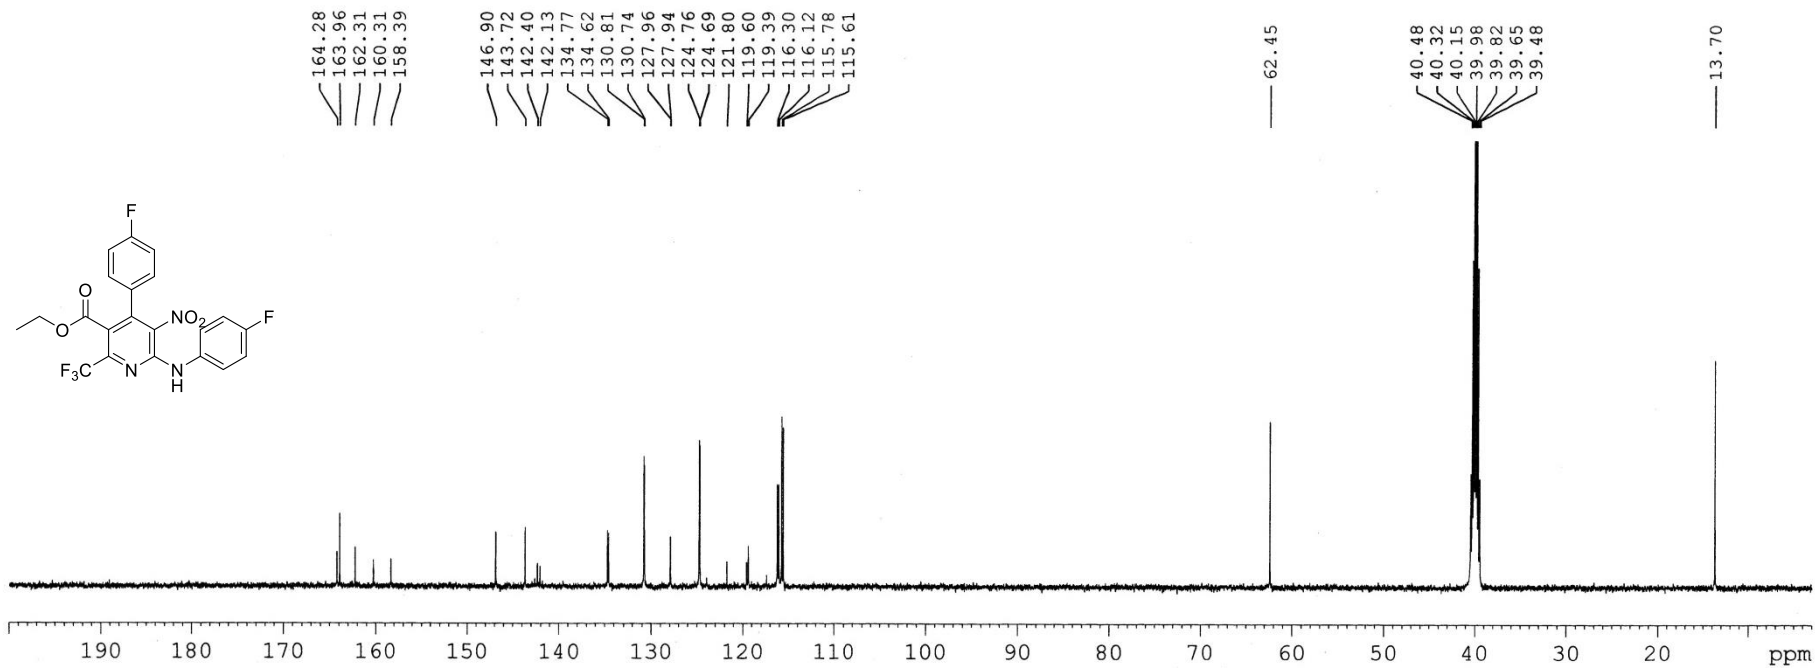

Figure S4.  $^{13}\text{C}$  NMR (125 MHz,  $\text{DMSO-}d_6$ ) spectra of compound 4a

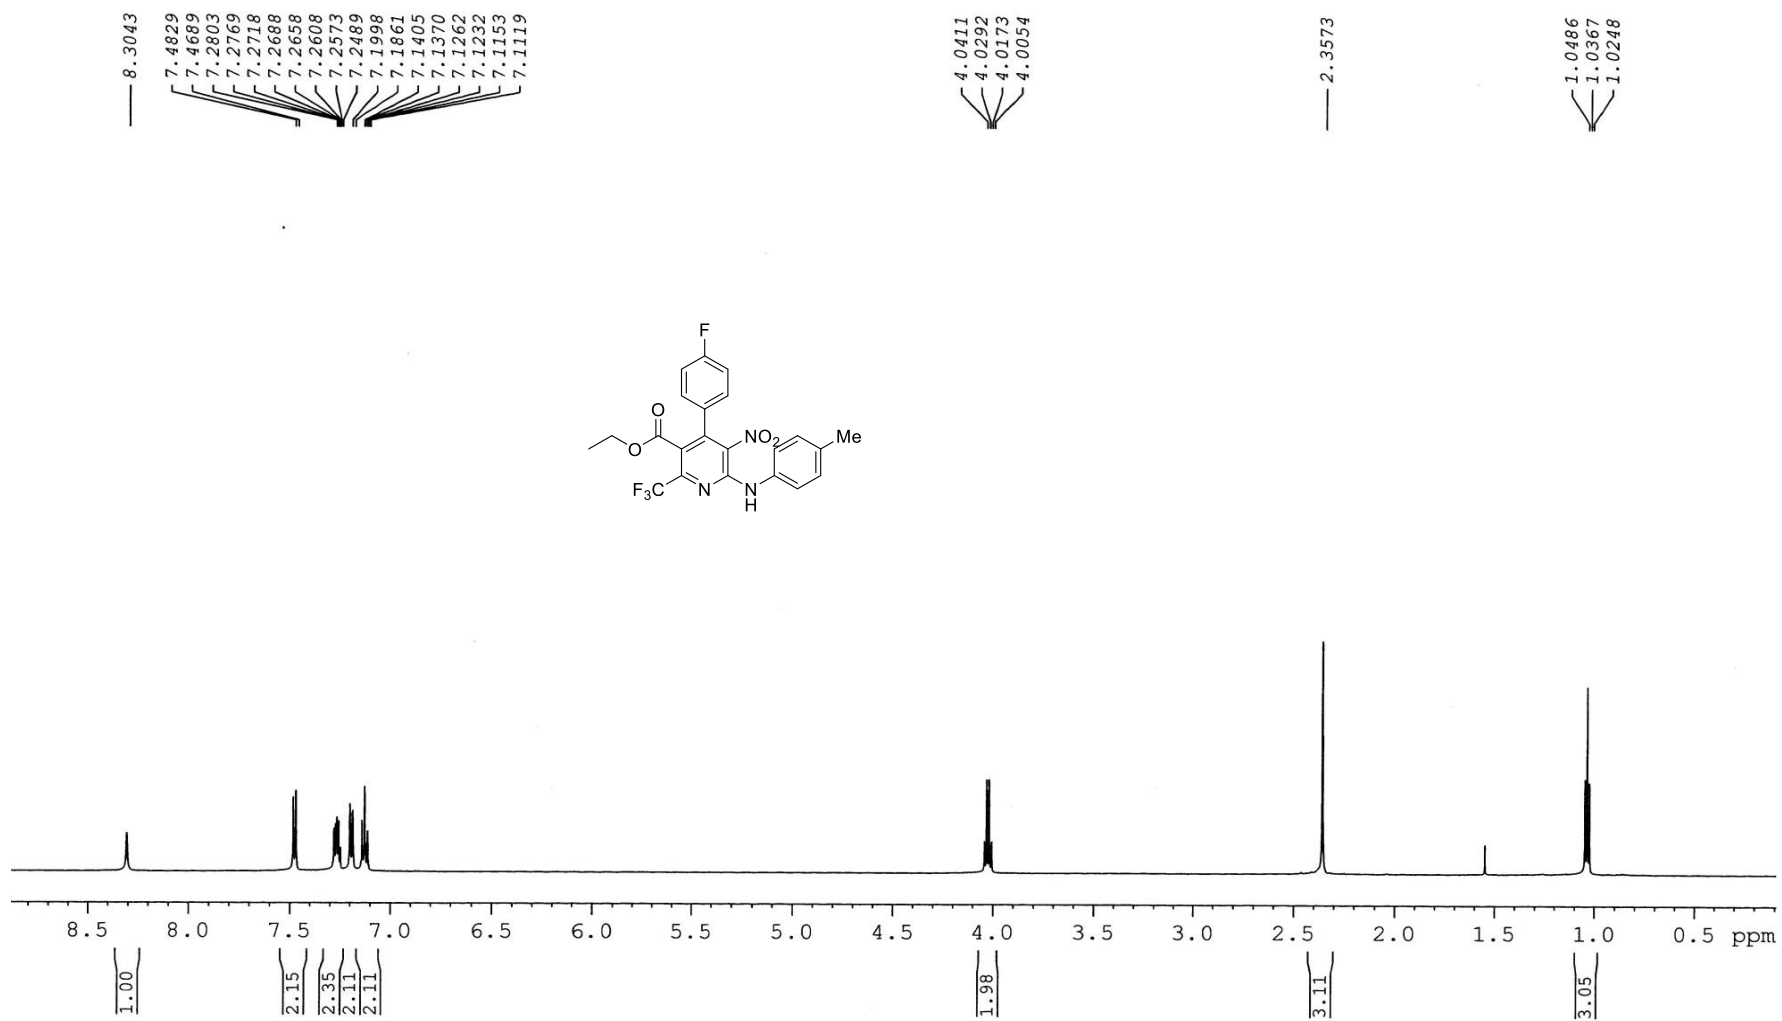

Figure S5. <sup>1</sup>H NMR (600 MHz, CDCl<sub>3</sub>) spectra of compound **4b**



DEPT135

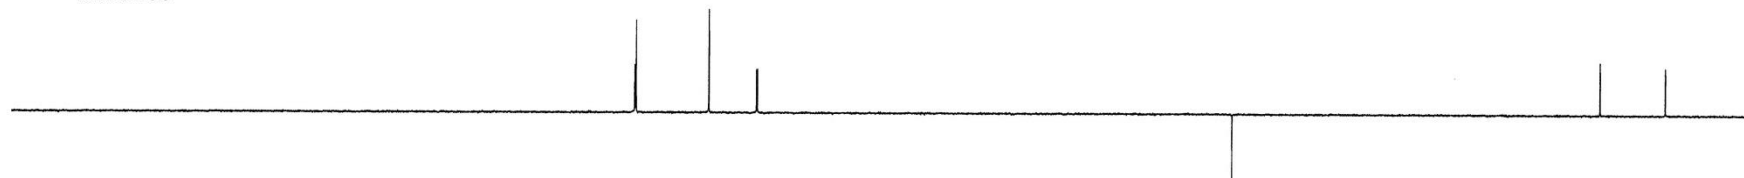

YUNNAN UNIVERSITY ASCEND AVIIIHD600 DXX-3-20-1  
Sep06-2017-duxuanxuan  
C13CPD CDCl3

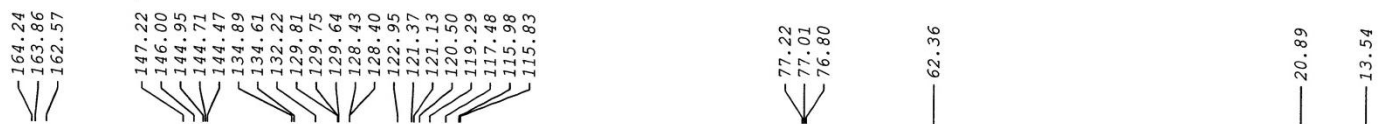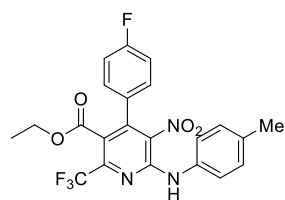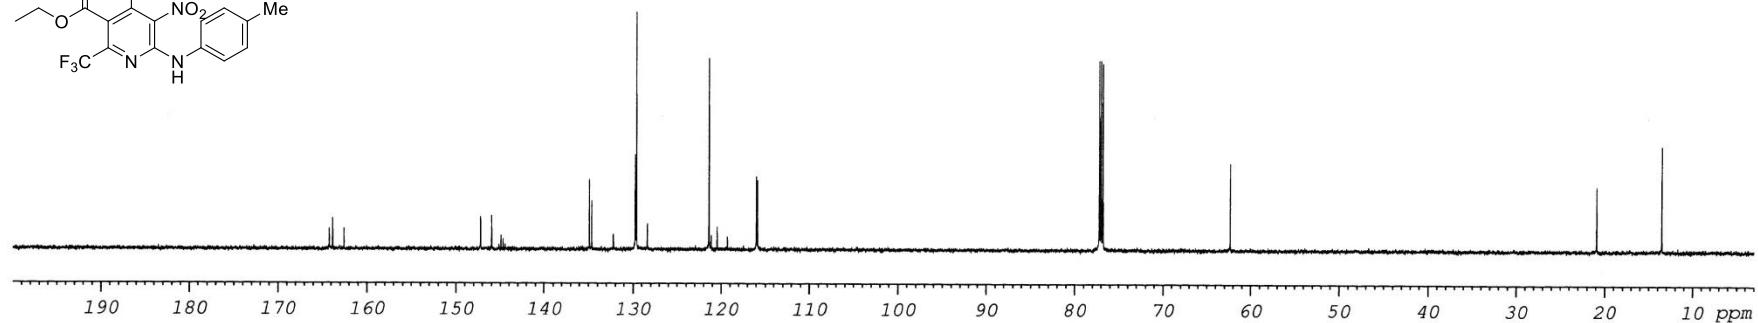

Figure S6.  $^{13}\text{C}$  NMR (150 MHz,  $\text{CDCl}_3$ ) spectra of compound **4b**

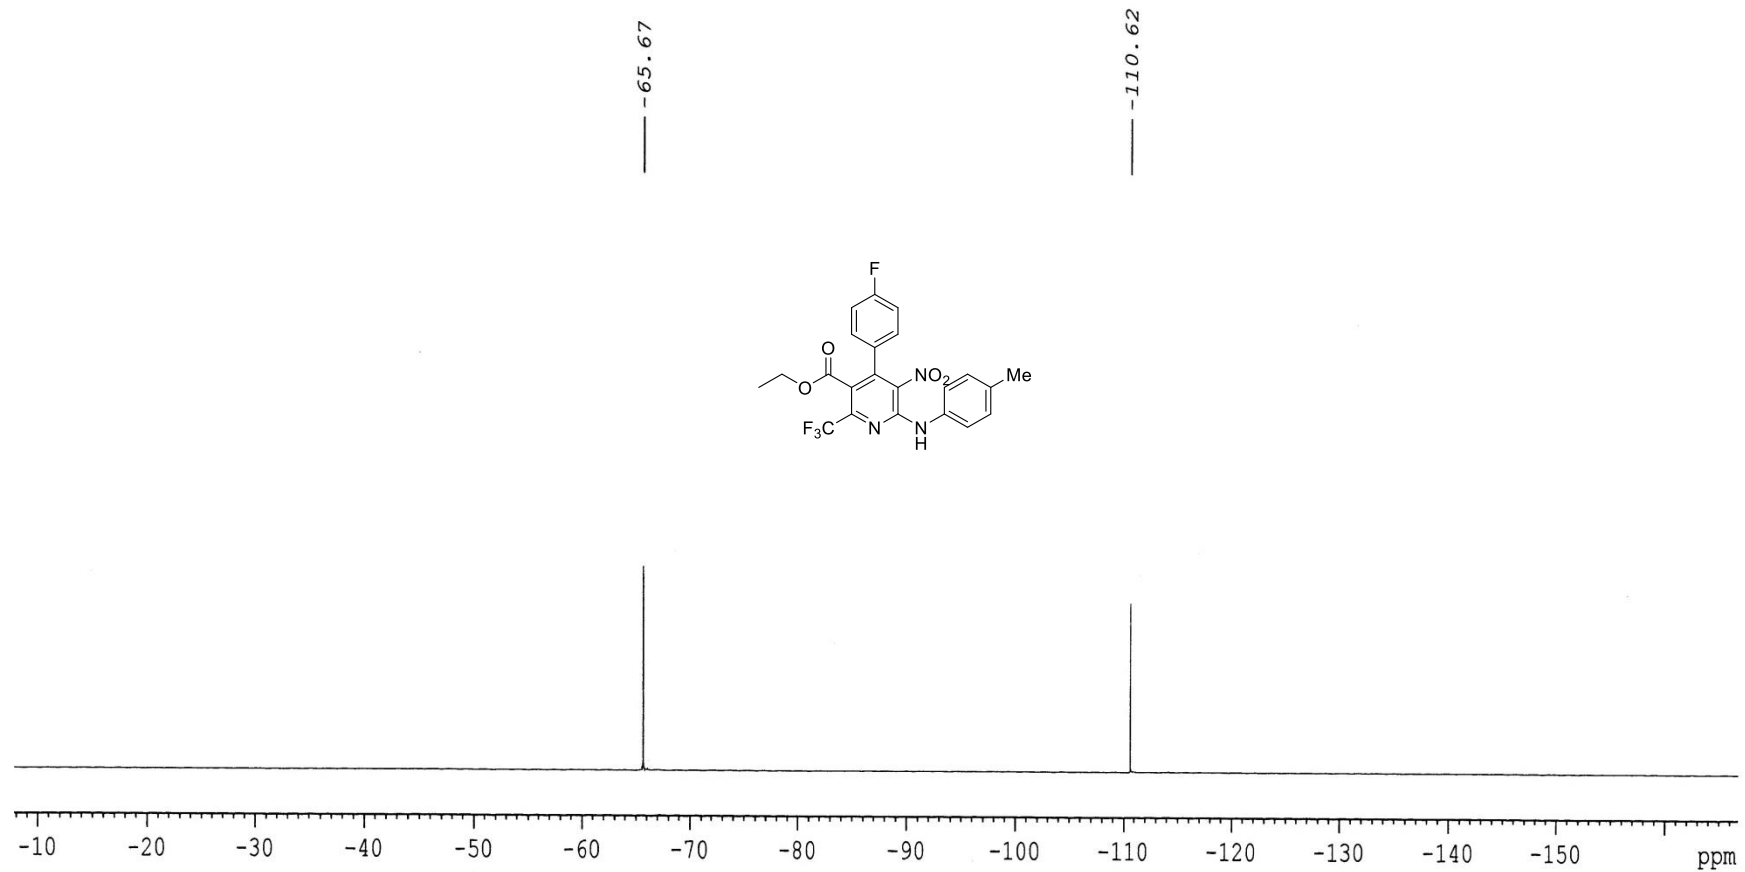

**Figure S7.**  $^{19}\text{F}$  NMR (564 MHz,  $\text{CDCl}_3$ ) spectra of compound **4b**

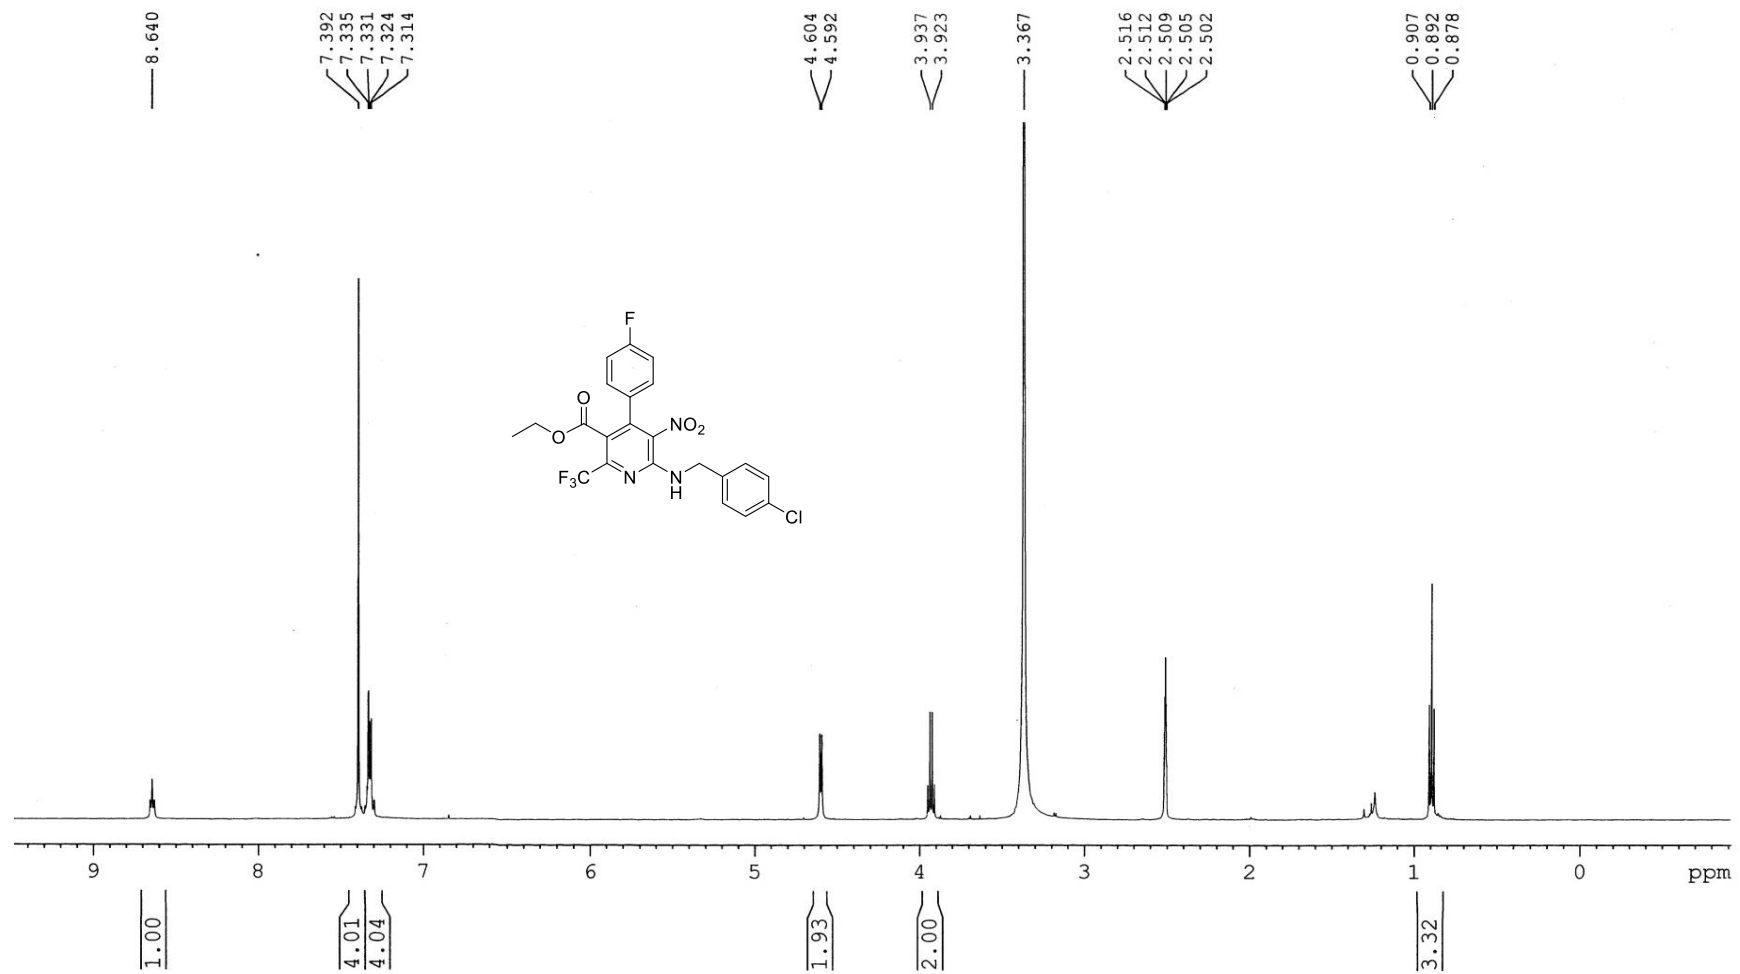

**Figure S8.** <sup>1</sup>H NMR (500 MHz, DMSO-*d*<sub>6</sub>) spectra of compound **4c**

DEPT135

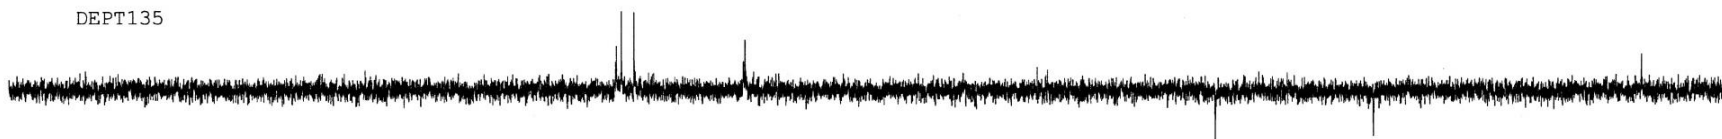

YUNNAN UNIVERSITY AVIIIHD500 DXX3-8-1  
Jun27-2017-duxuanxuan  
C13CPD DMSO

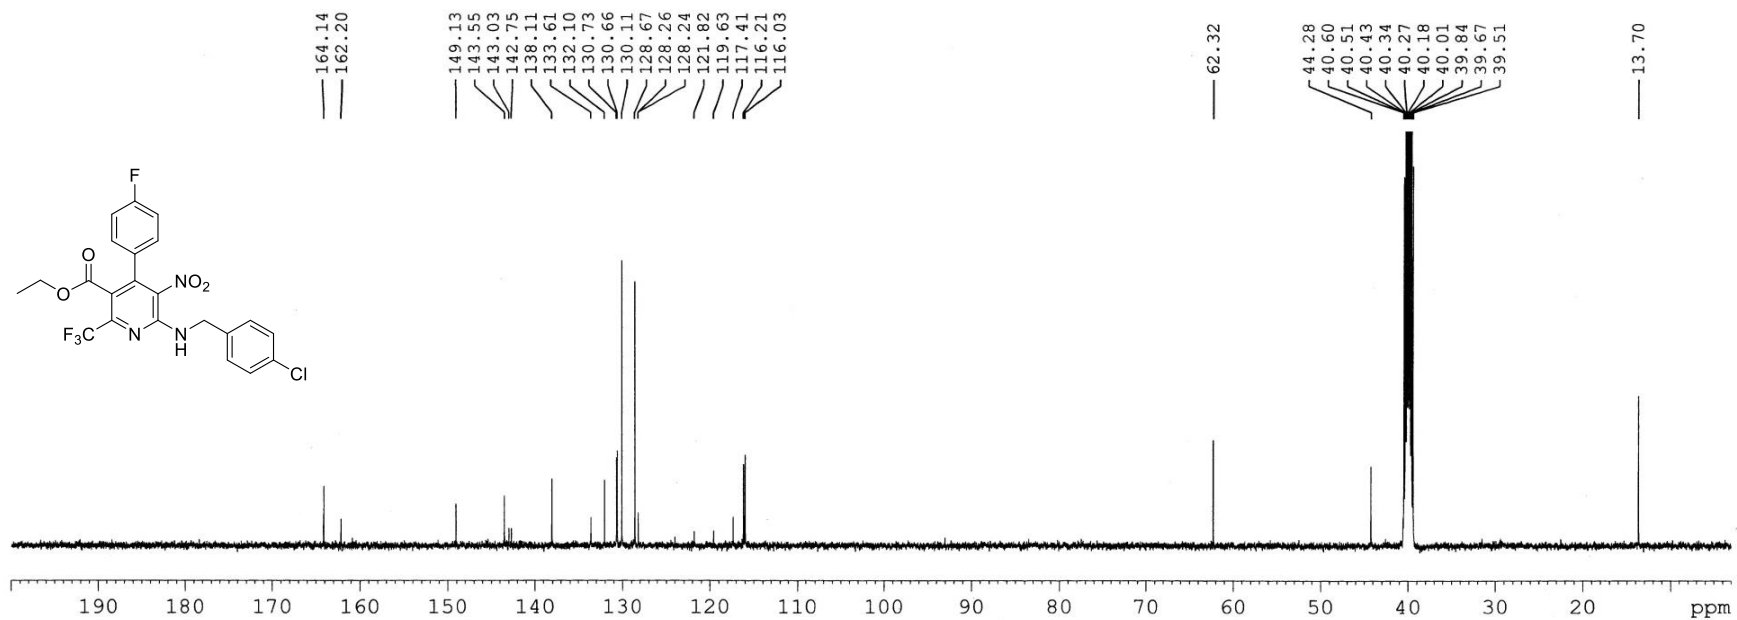

Figure S9.  $^{13}\text{C}$  NMR (125 MHz,  $\text{DMSO-}d_6$ ) spectra of compound 4c

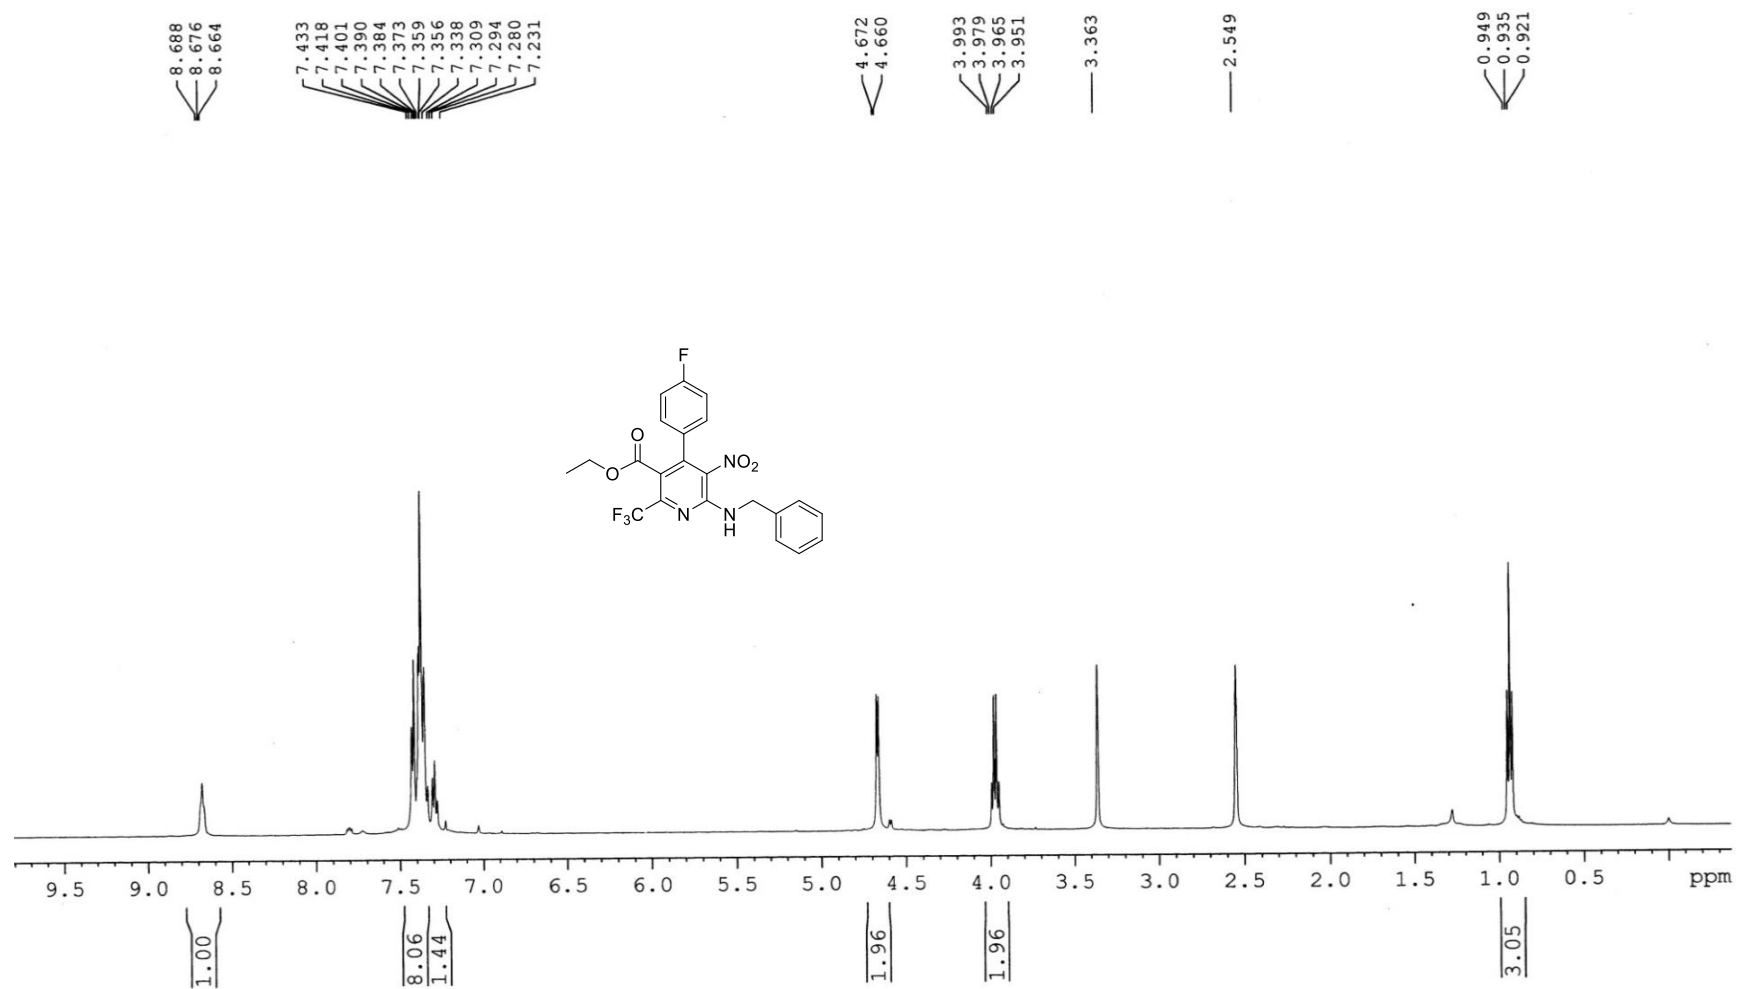

**Figure S10.** <sup>1</sup>H NMR (500 MHz, DMSO-*d*<sub>6</sub>) spectra of compound **4d**

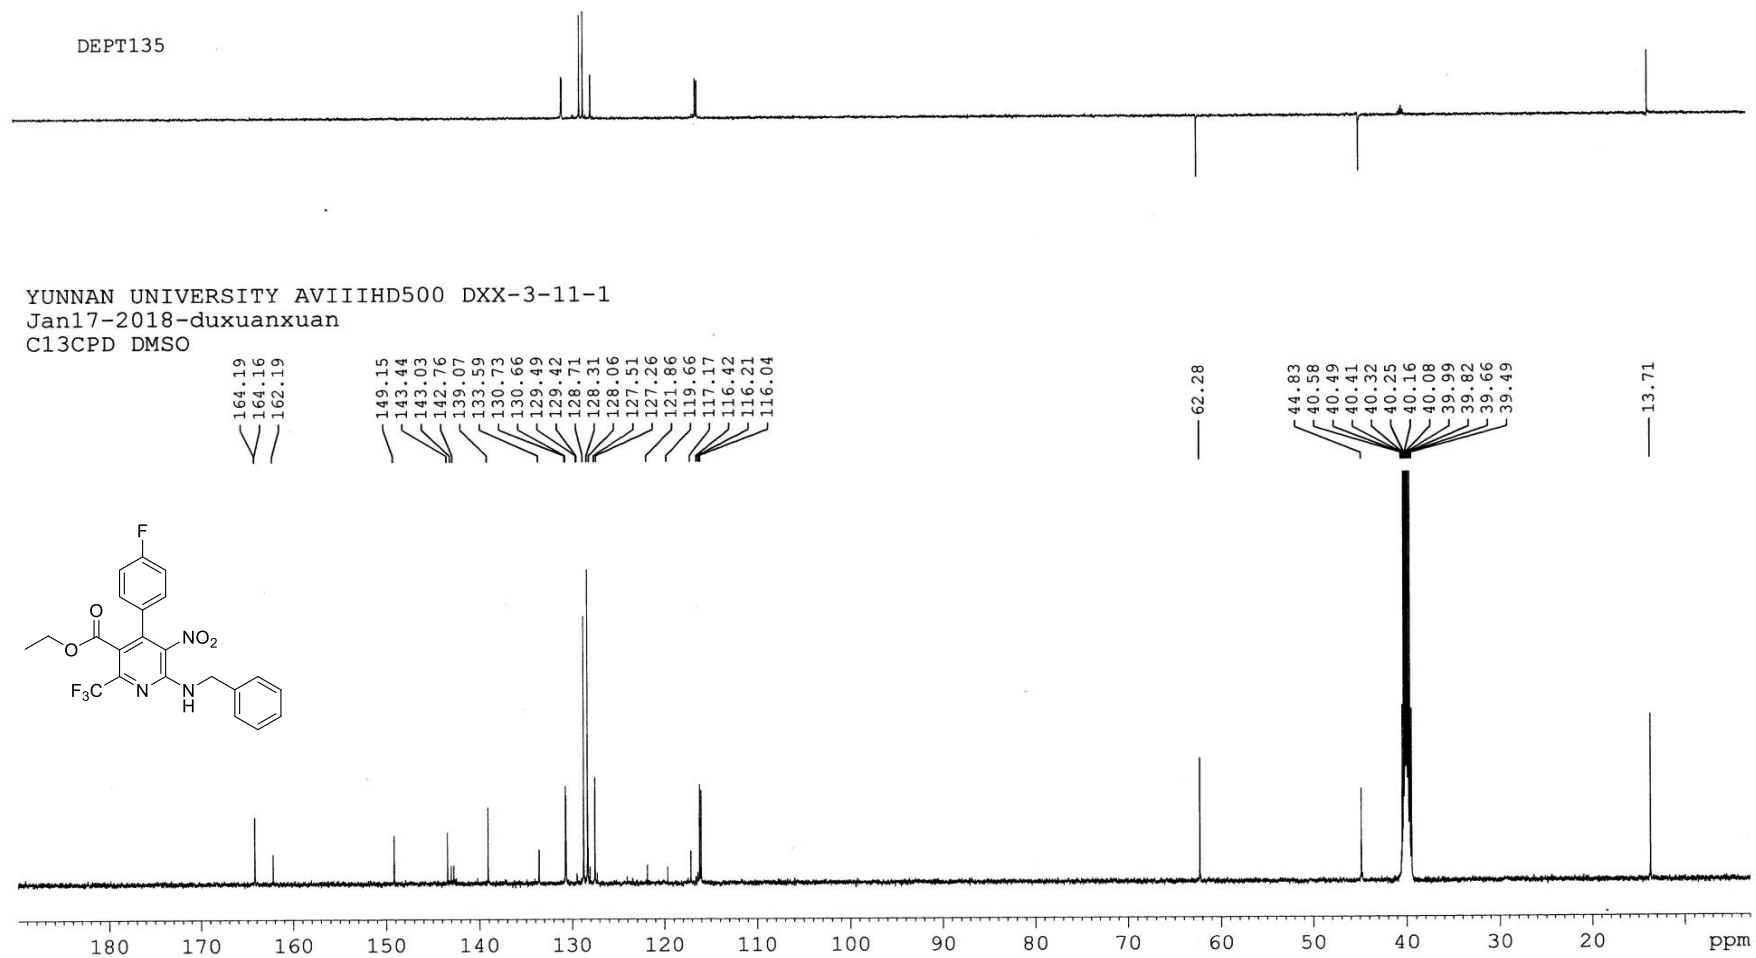

Figure S11.  $^{13}\text{C}$  NMR (125 MHz,  $\text{DMSO-}d_6$ ) spectra of compound **4d**

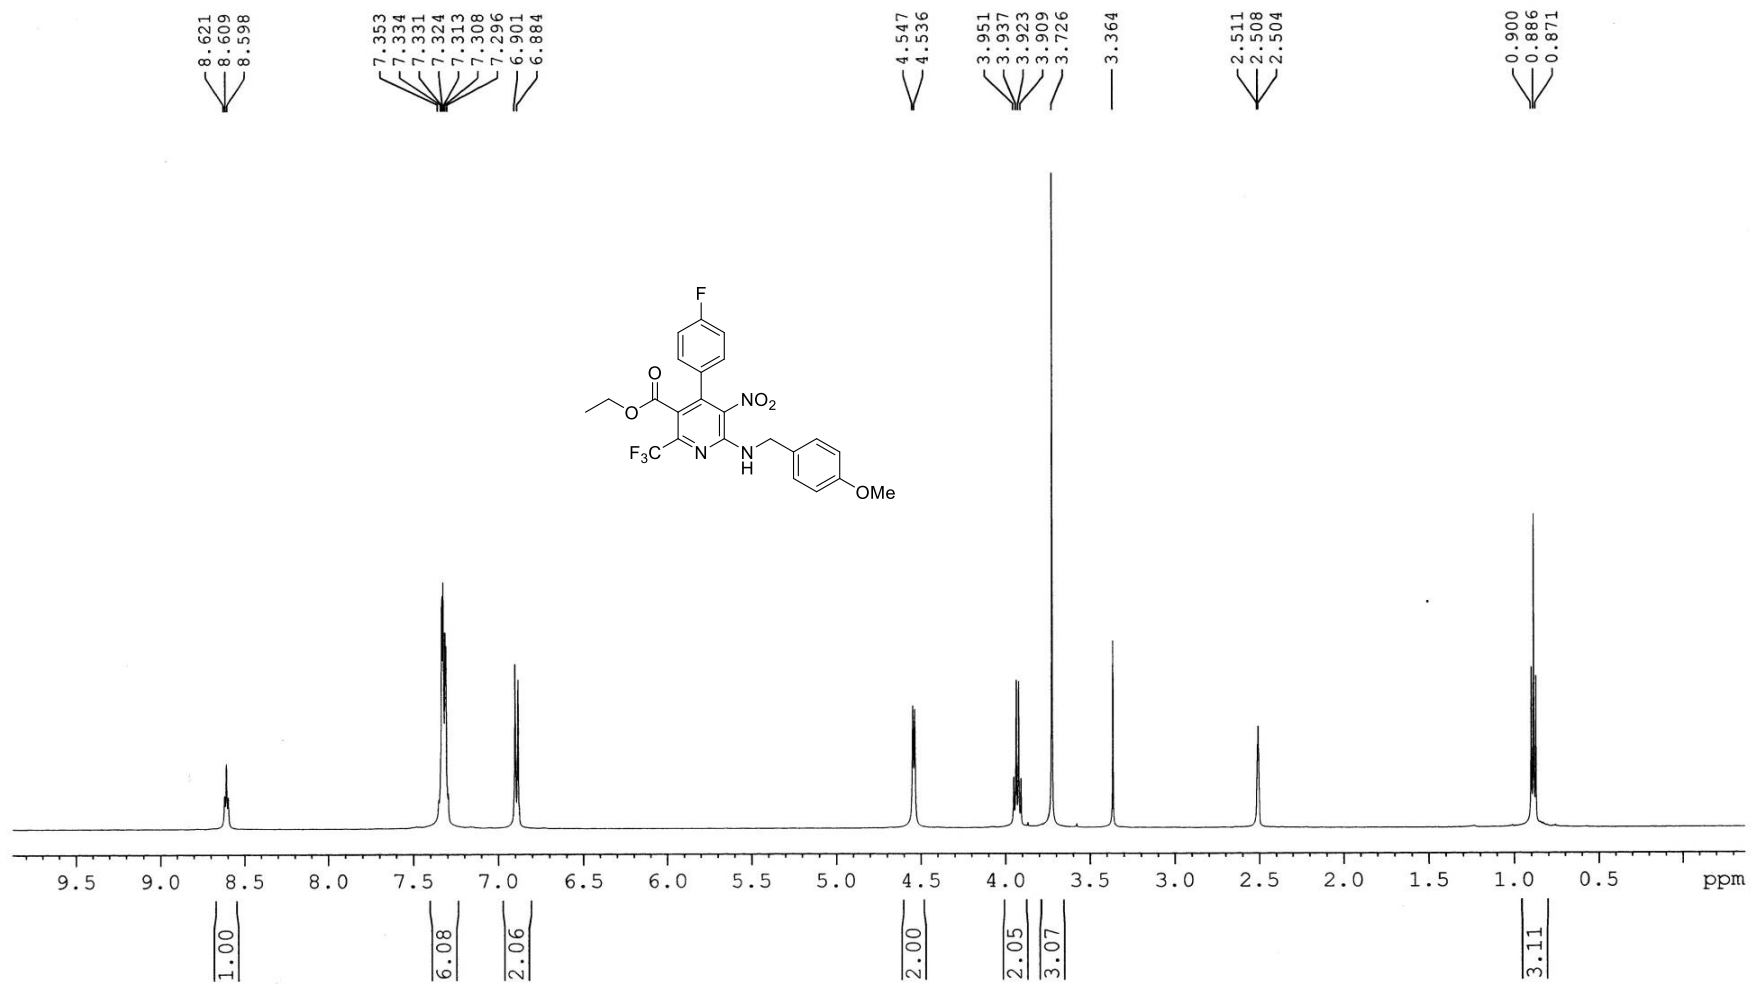

**Figure S12.**  $^1\text{H}$  NMR (500 MHz,  $\text{DMSO-}d_6$ ) spectra of compound **4e**

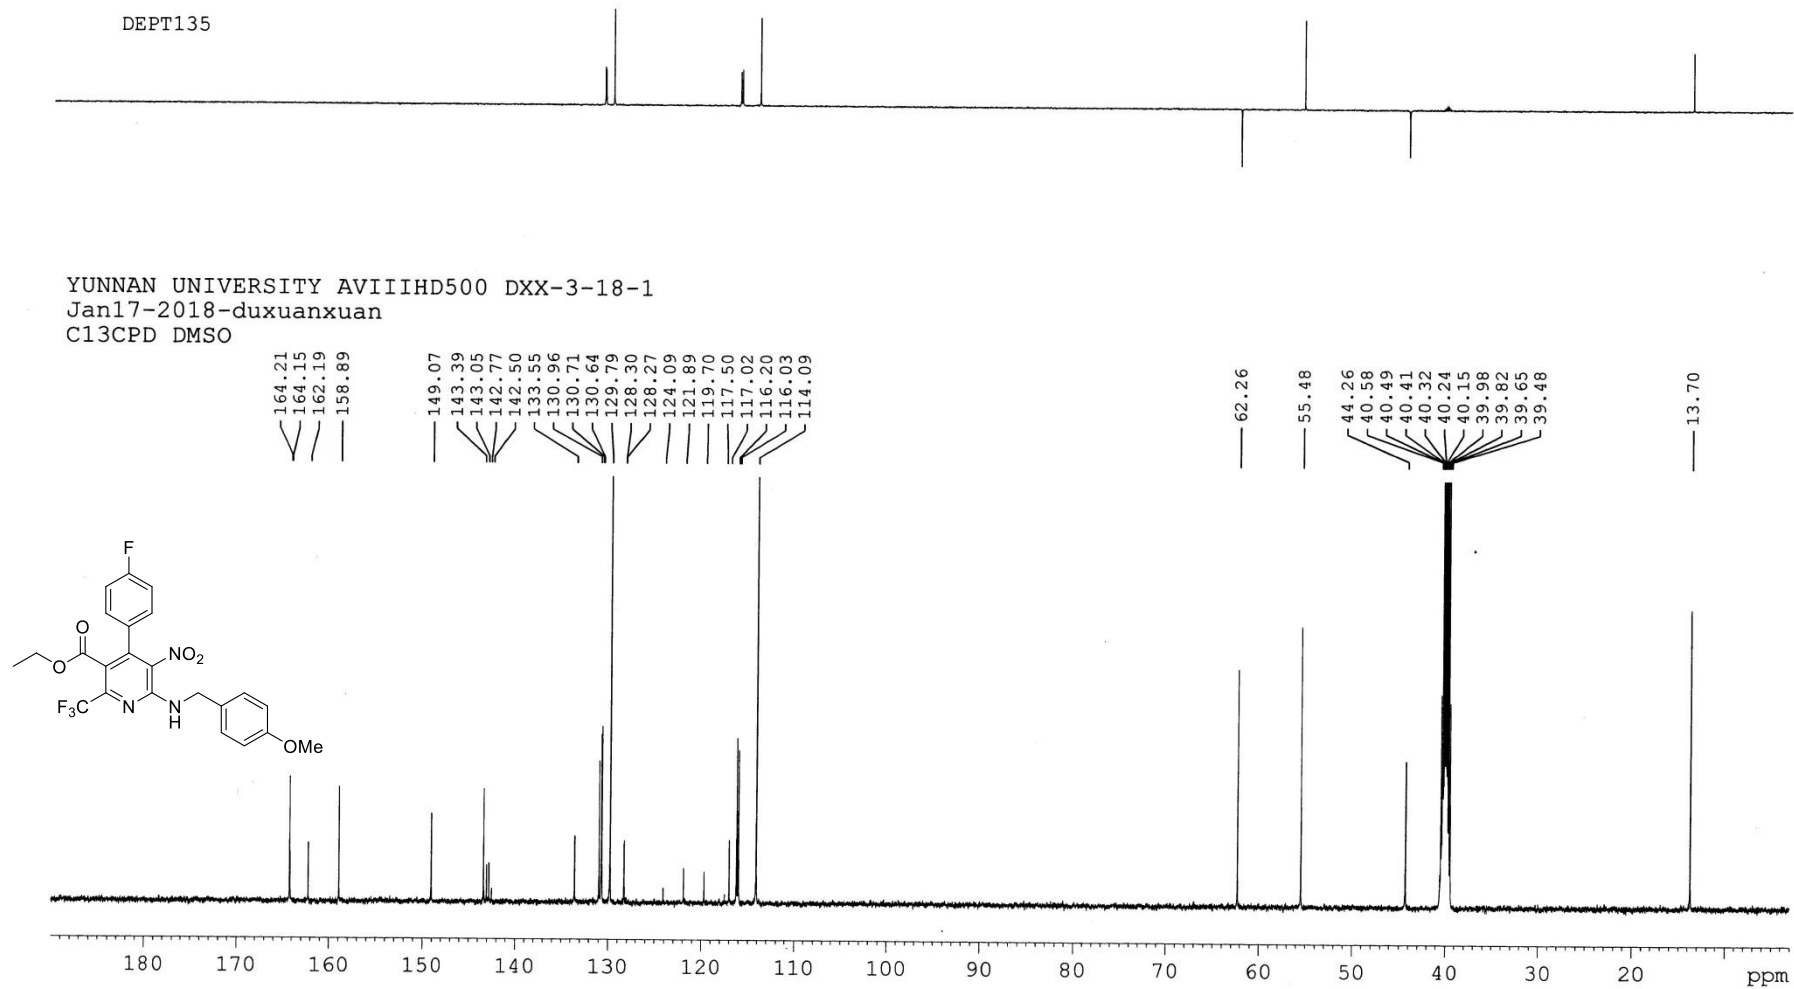

Figure S13.  $^{13}\text{C}$  NMR (125 MHz,  $\text{DMSO-}d_6$ ) spectra of compound 4e



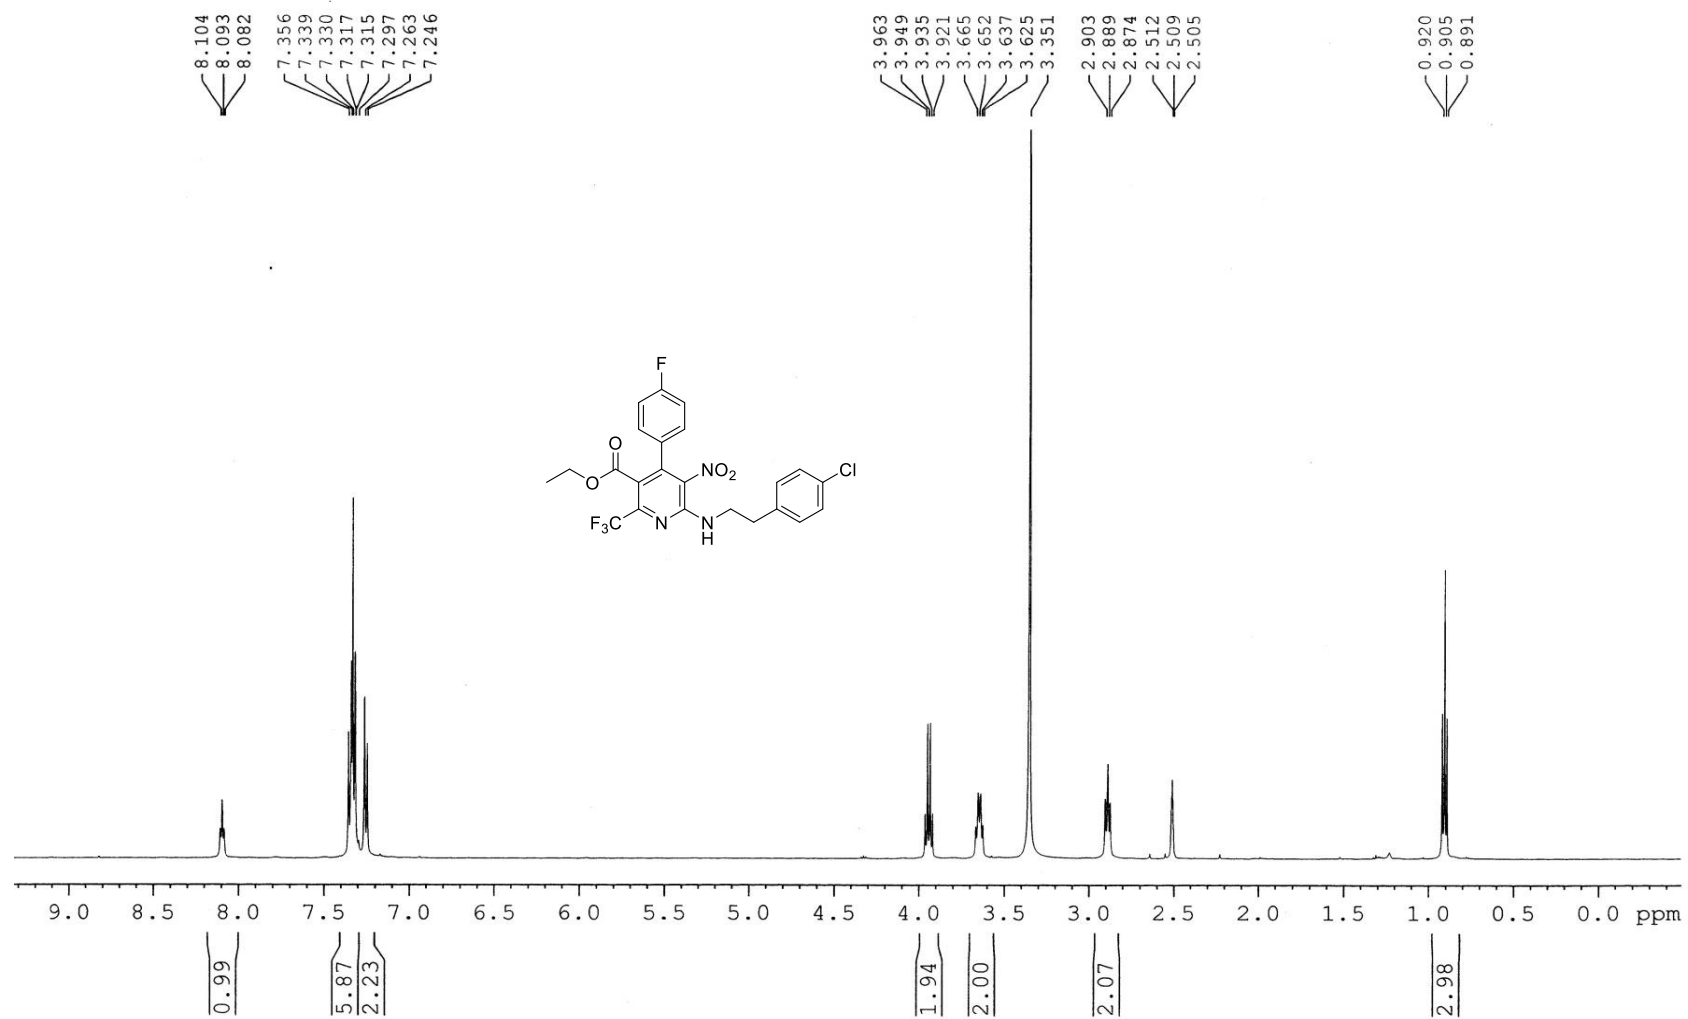

**Figure S14.**  $^1\text{H}$  NMR (500 MHz,  $\text{DMSO-}d_6$ ) spectra of compound **4f**

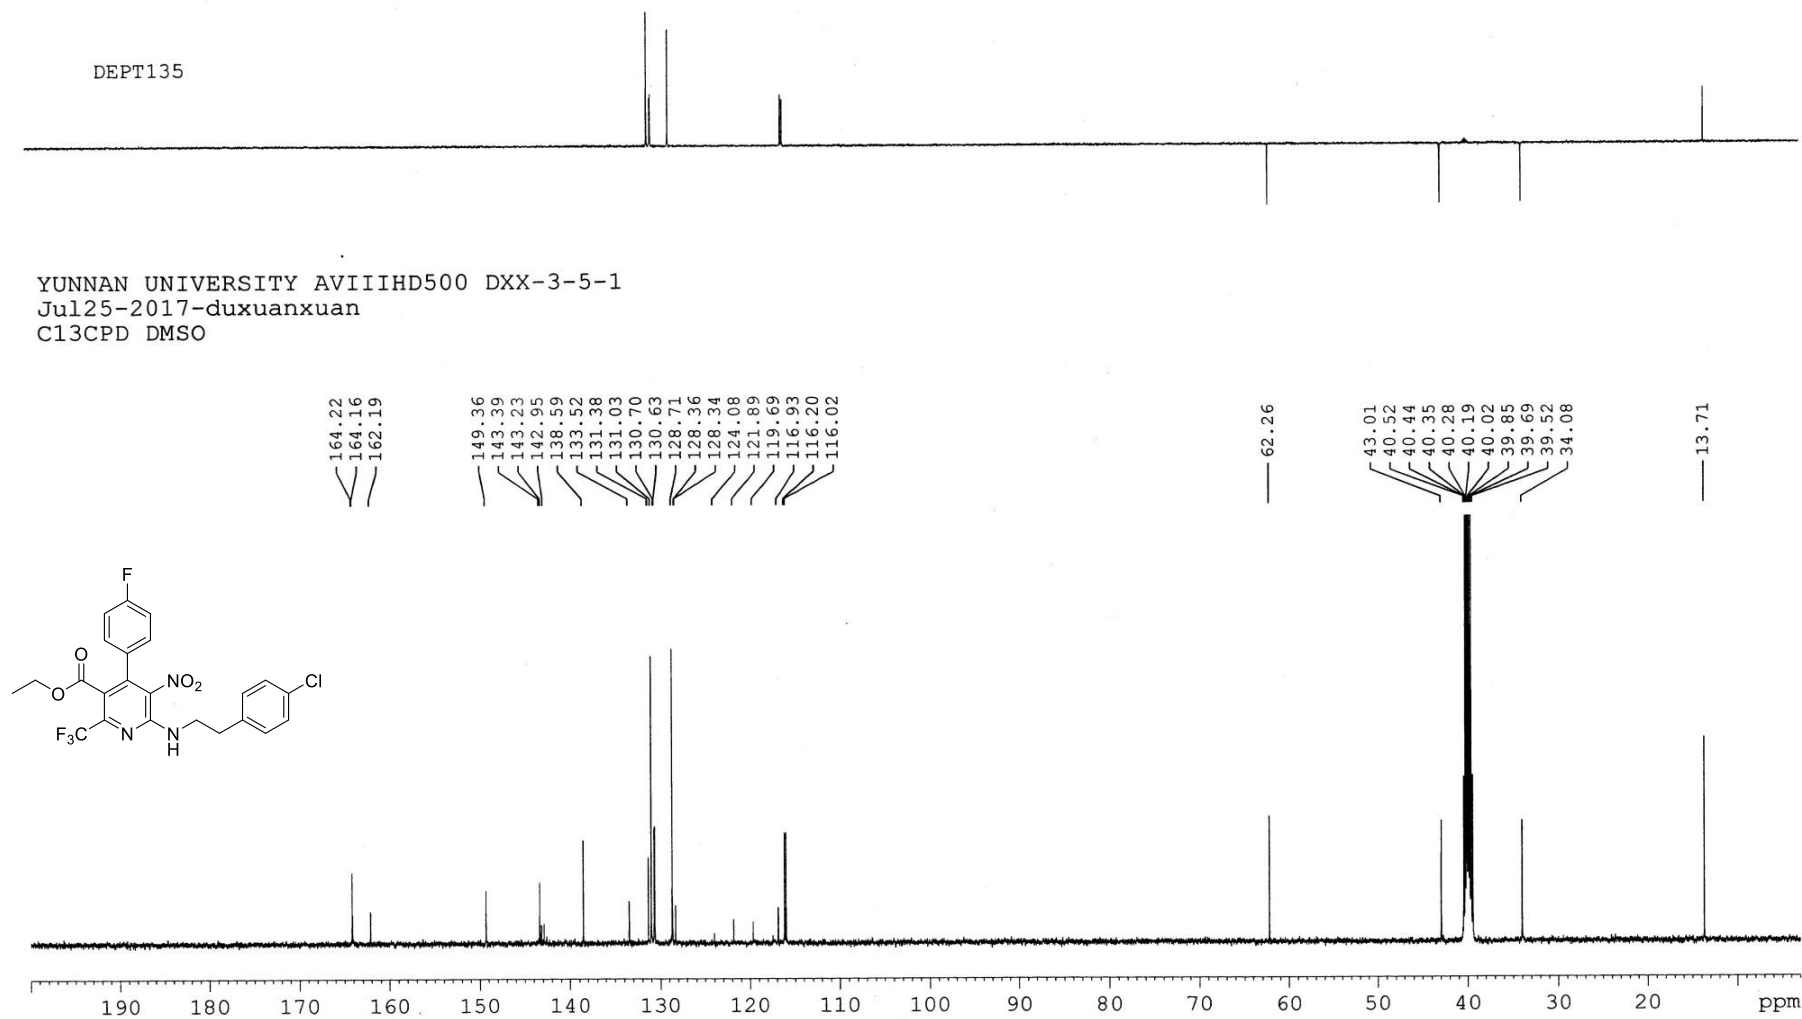

Figure S15. <sup>13</sup>C NMR (125 MHz, DMSO-*d*<sub>6</sub>) spectra of compound **4f**

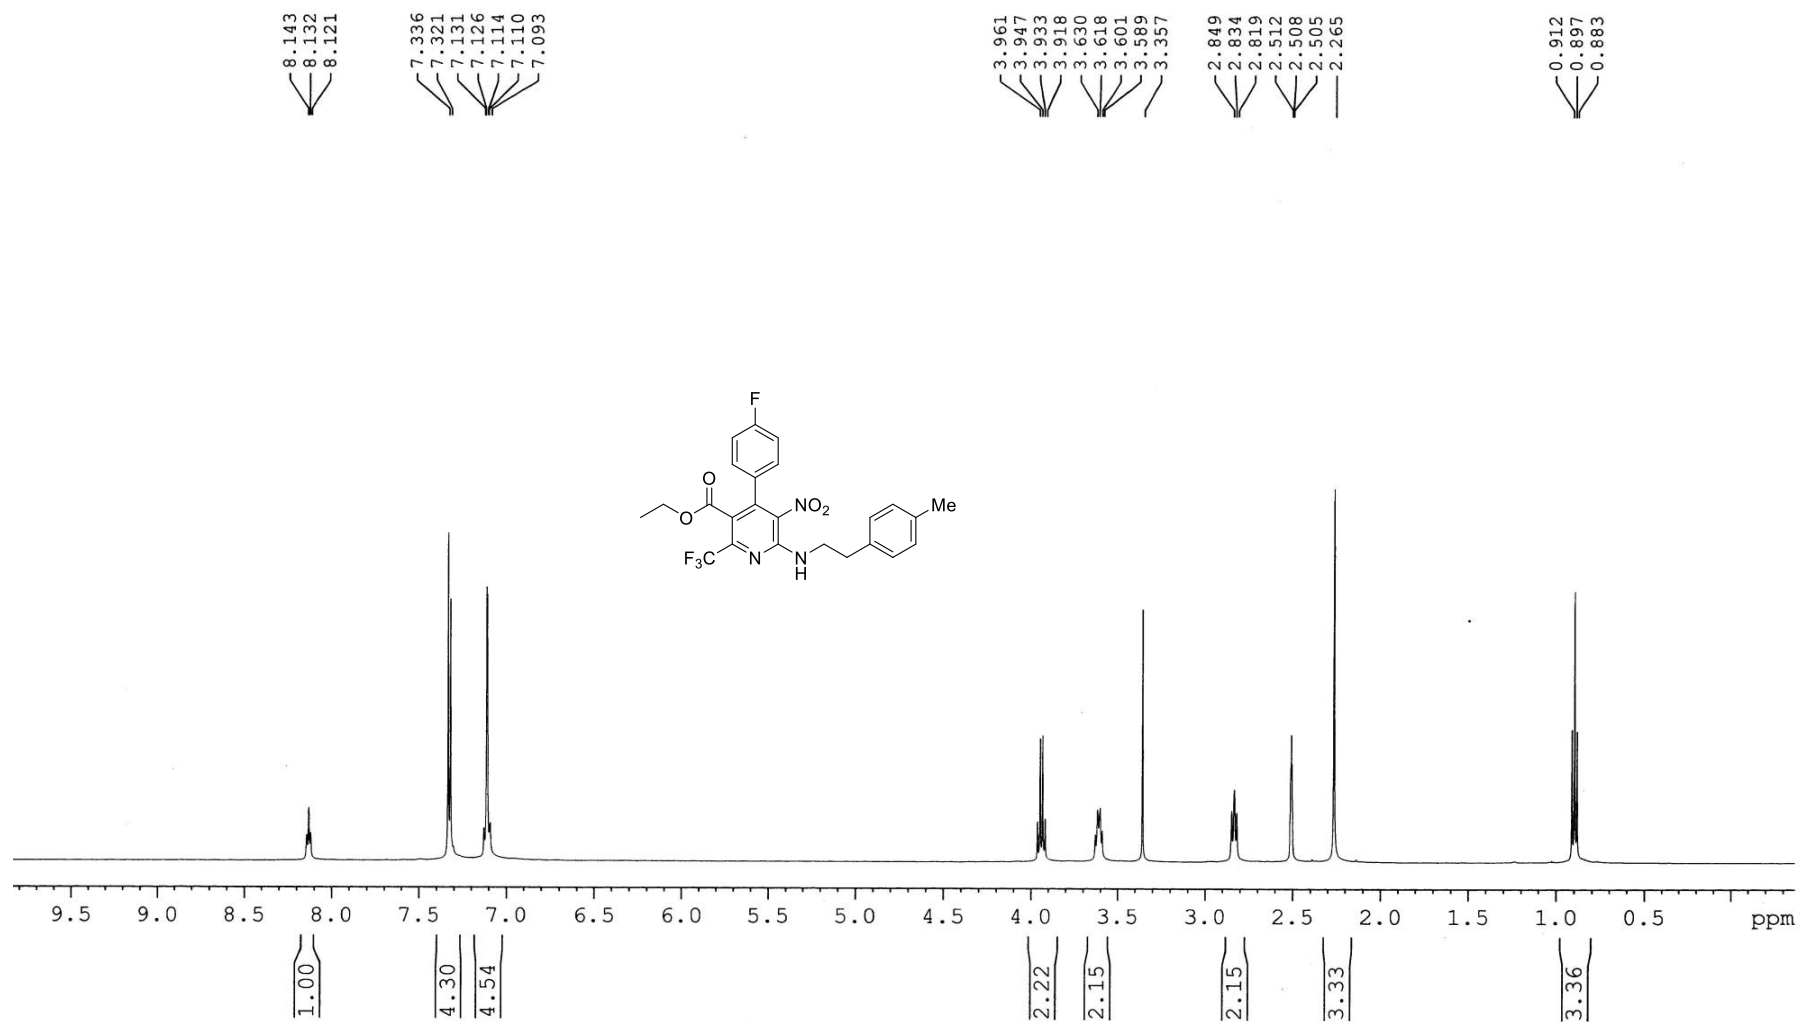

**Figure S16.**  $^1\text{H}$  NMR (500 MHz,  $\text{DMSO-}d_6$ ) spectra of compound **4g**

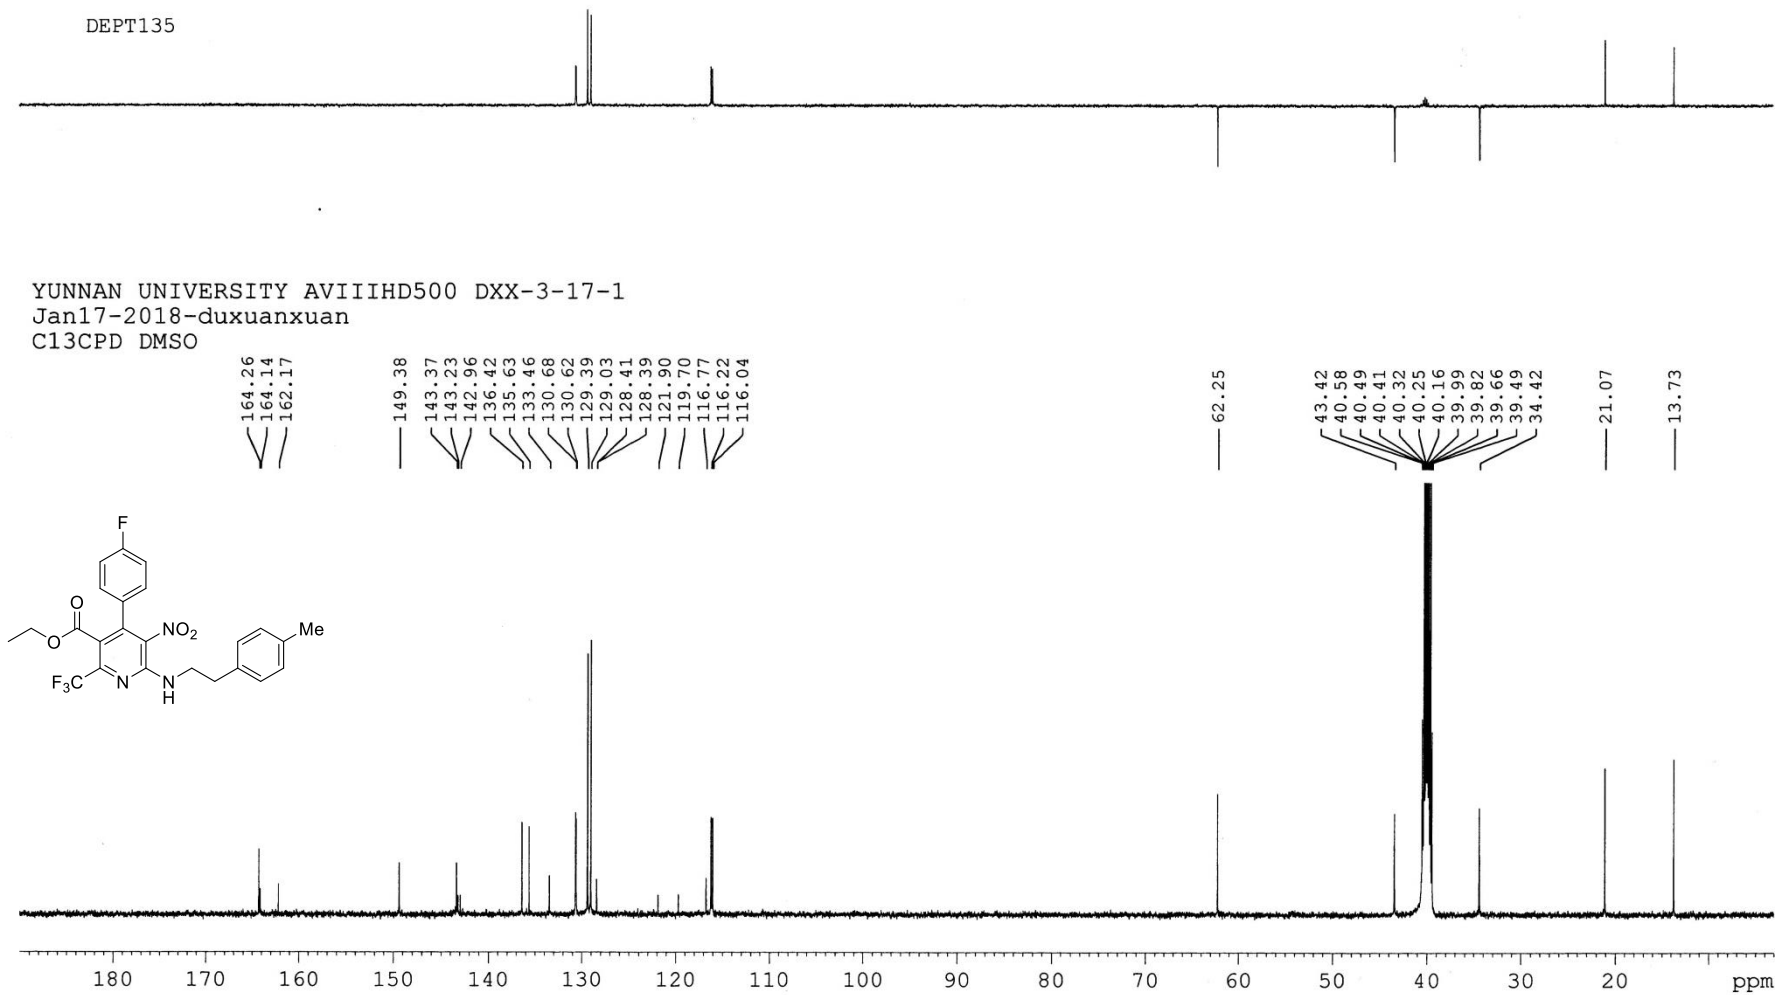

Figure S17.  $^{13}\text{C}$  NMR (125 MHz,  $\text{DMSO-}d_6$ ) spectra of compound 4g

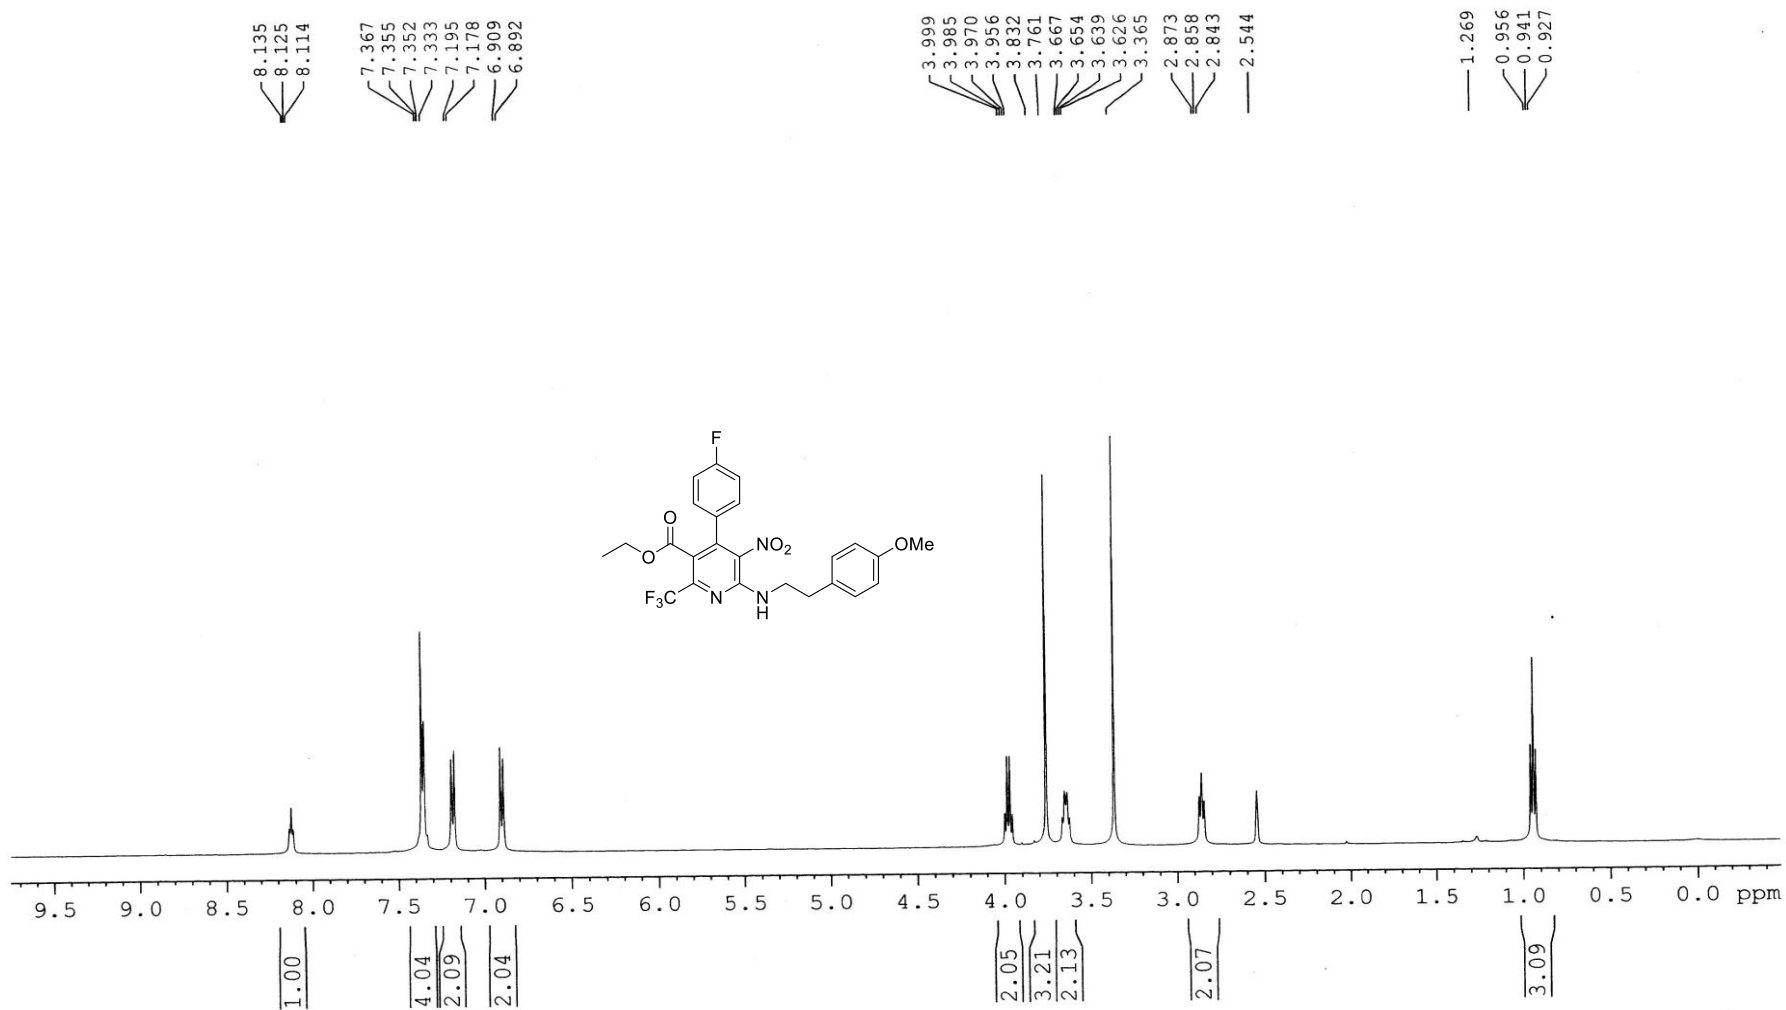

**Figure S18.** <sup>1</sup>H NMR (500 MHz, DMSO-*d*<sub>6</sub>) spectra of compound **4h**

DEPT135

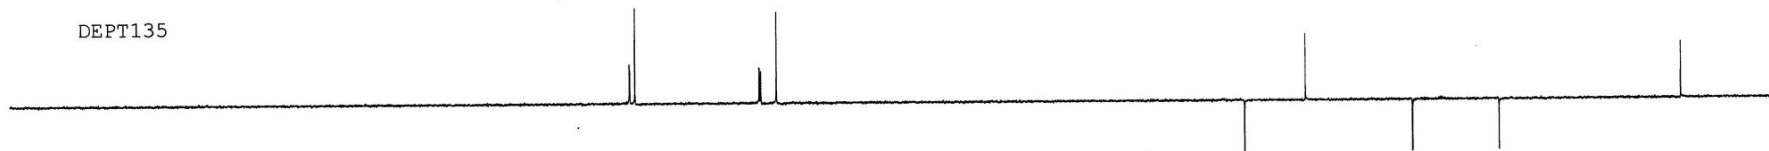

YUNNAN UNIVERSITY AVIIIHD500 DXX-3-12-1  
Jun23-2017-duxuanxuan  
C13CPD DMSO

164.25  
164.15  
162.18  
158.29  
149.42  
143.55  
143.42  
143.27  
143.00  
133.45  
131.40  
130.70  
130.63  
130.10  
128.43  
128.41  
124.10  
121.91  
119.71  
116.81  
116.18  
116.01  
114.30  
62.24  
55.46  
43.54  
40.54  
40.38  
40.21  
40.04  
39.88  
39.71  
39.54  
33.98  
13.71

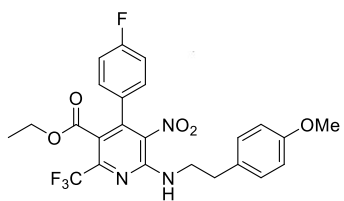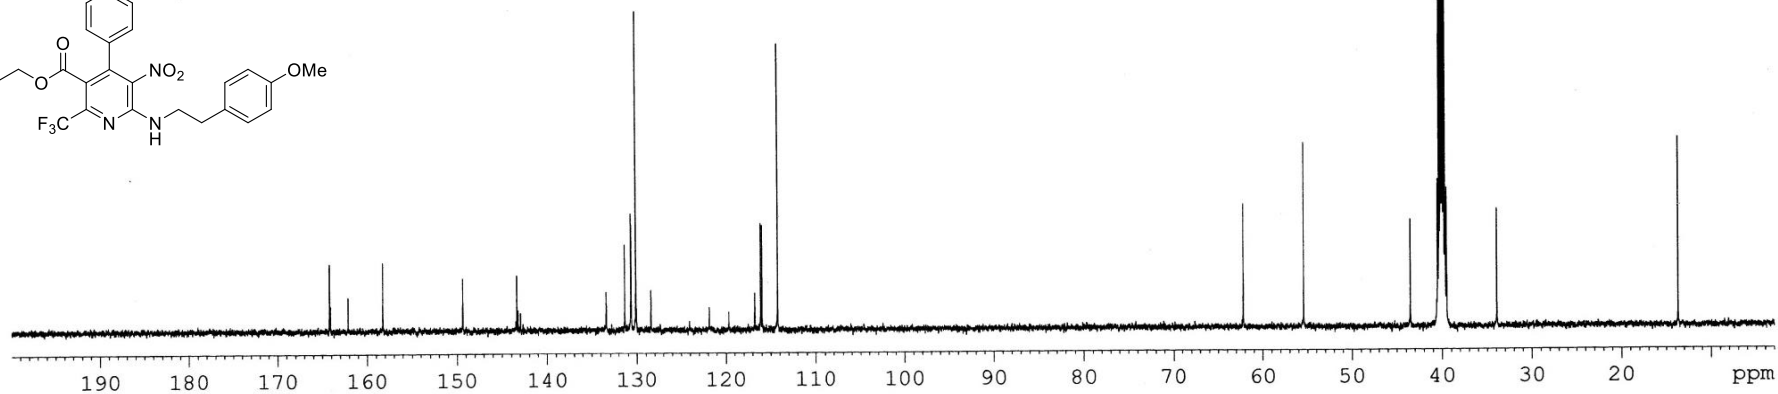

Figure S19. <sup>13</sup>C NMR (125 MHz, DMSO-*d*<sub>6</sub>) spectra of compound 4h

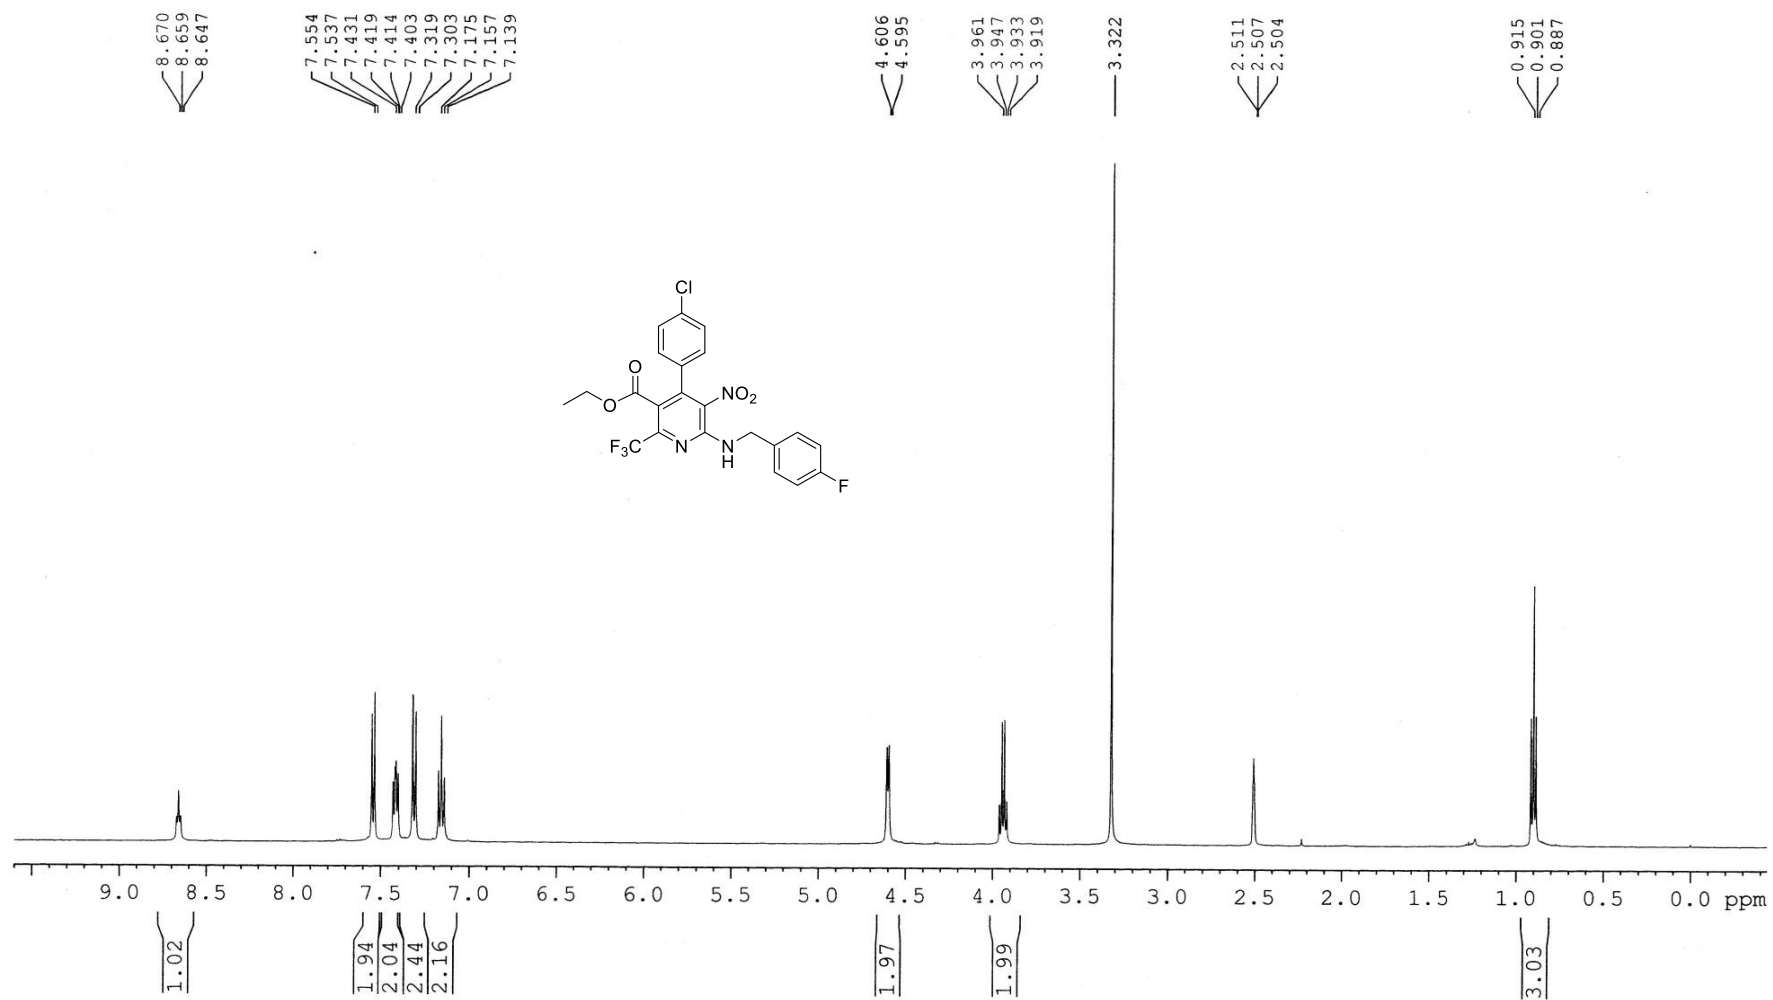

**Figure S20.** <sup>1</sup>H NMR (500 MHz, DMSO-*d*<sub>6</sub>) spectra of compound **4i**

DEPT135

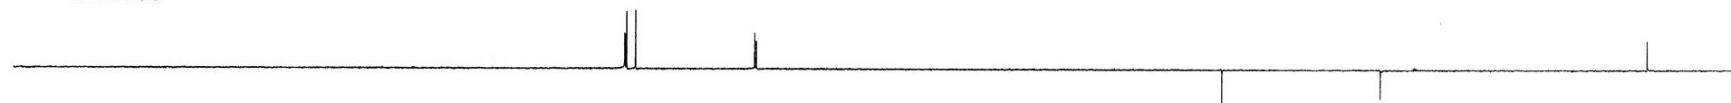

YUNNAN UNIVERSITY AVIIHD500 DXX-3-23-1  
Sep30-2017-duxuanxuan  
C13CPD DMSO

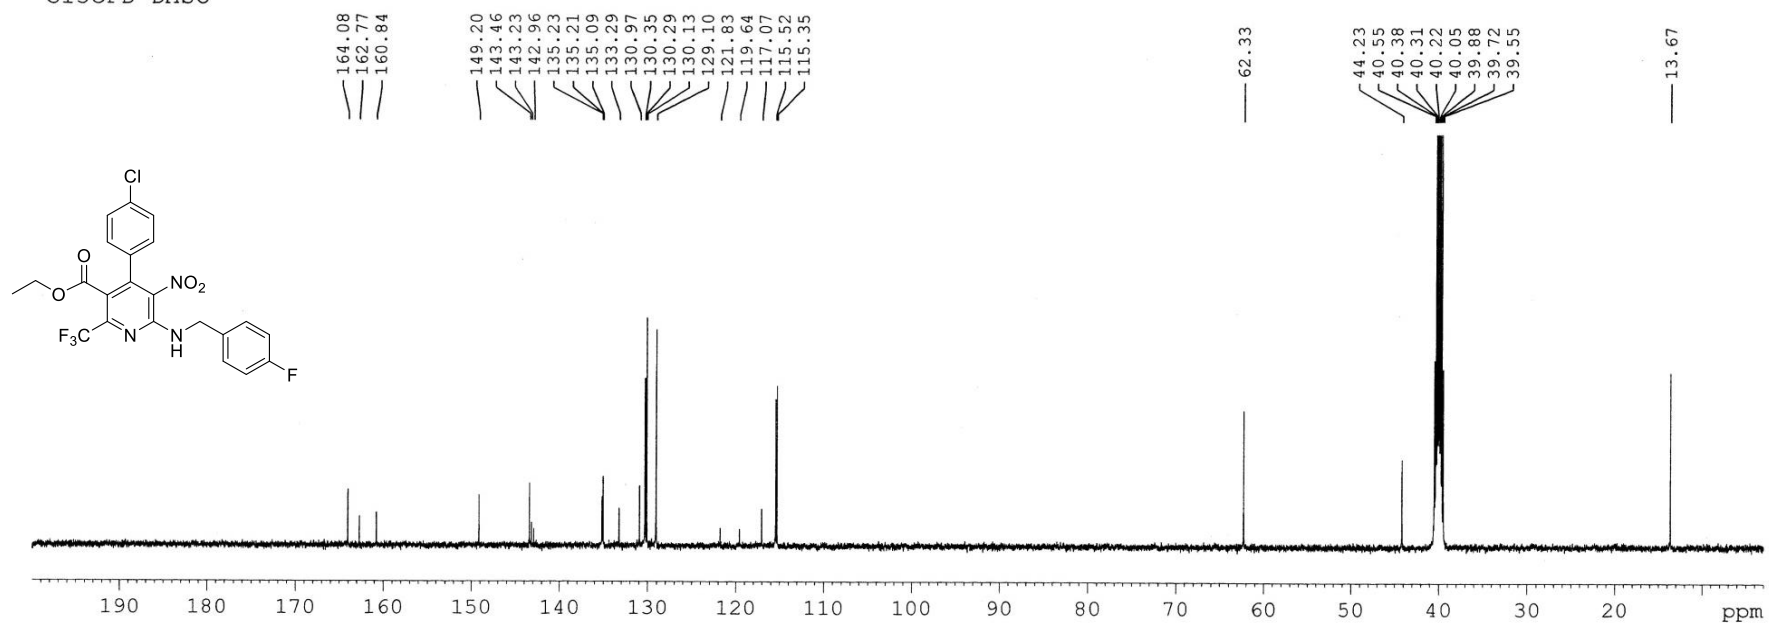

Figure S21.  $^{13}\text{C}$  NMR (125 MHz,  $\text{DMSO-}d_6$ ) spectra of compound 4i



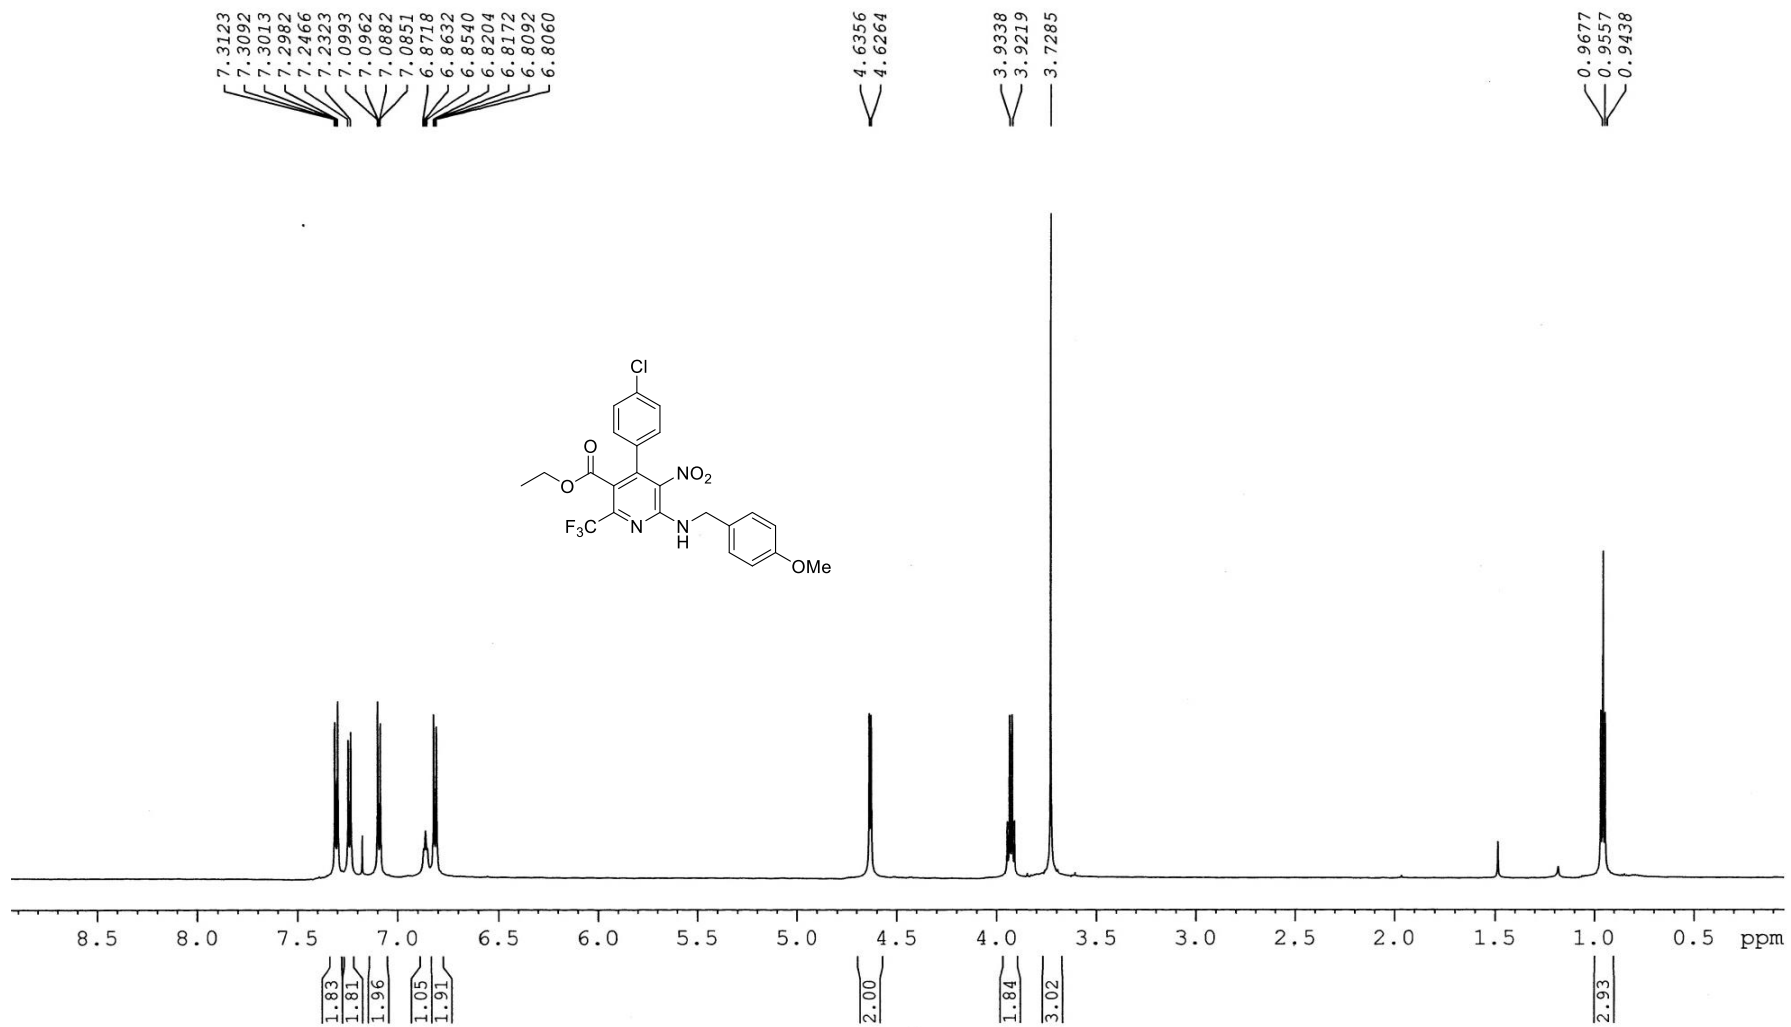

**Figure S22.**  $^1\text{H}$  NMR (600 MHz,  $\text{CDCl}_3$ ) spectra of compound **4j**

DEPT135

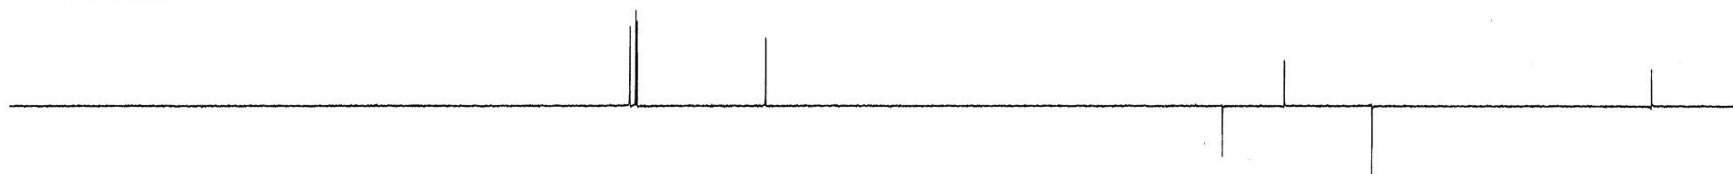

YUNNAN UNIVERSITY ASCEND AVIIIHD600 DXX-3-33-1  
Sep06-2017-duxuanxuan  
C13CPD CDC13

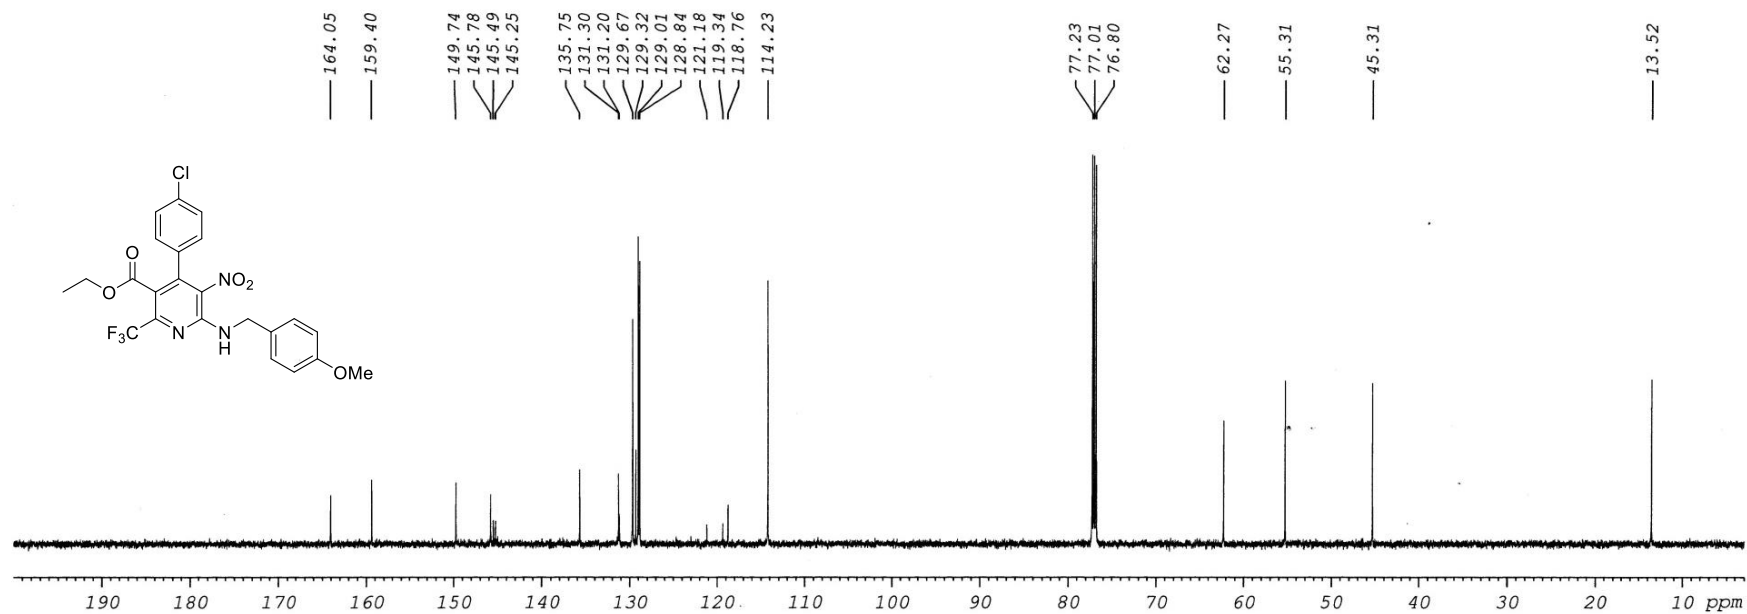

Figure S23.  $^{13}\text{C}$  NMR (150 MHz,  $\text{CDCl}_3$ ) spectra of compound 4j

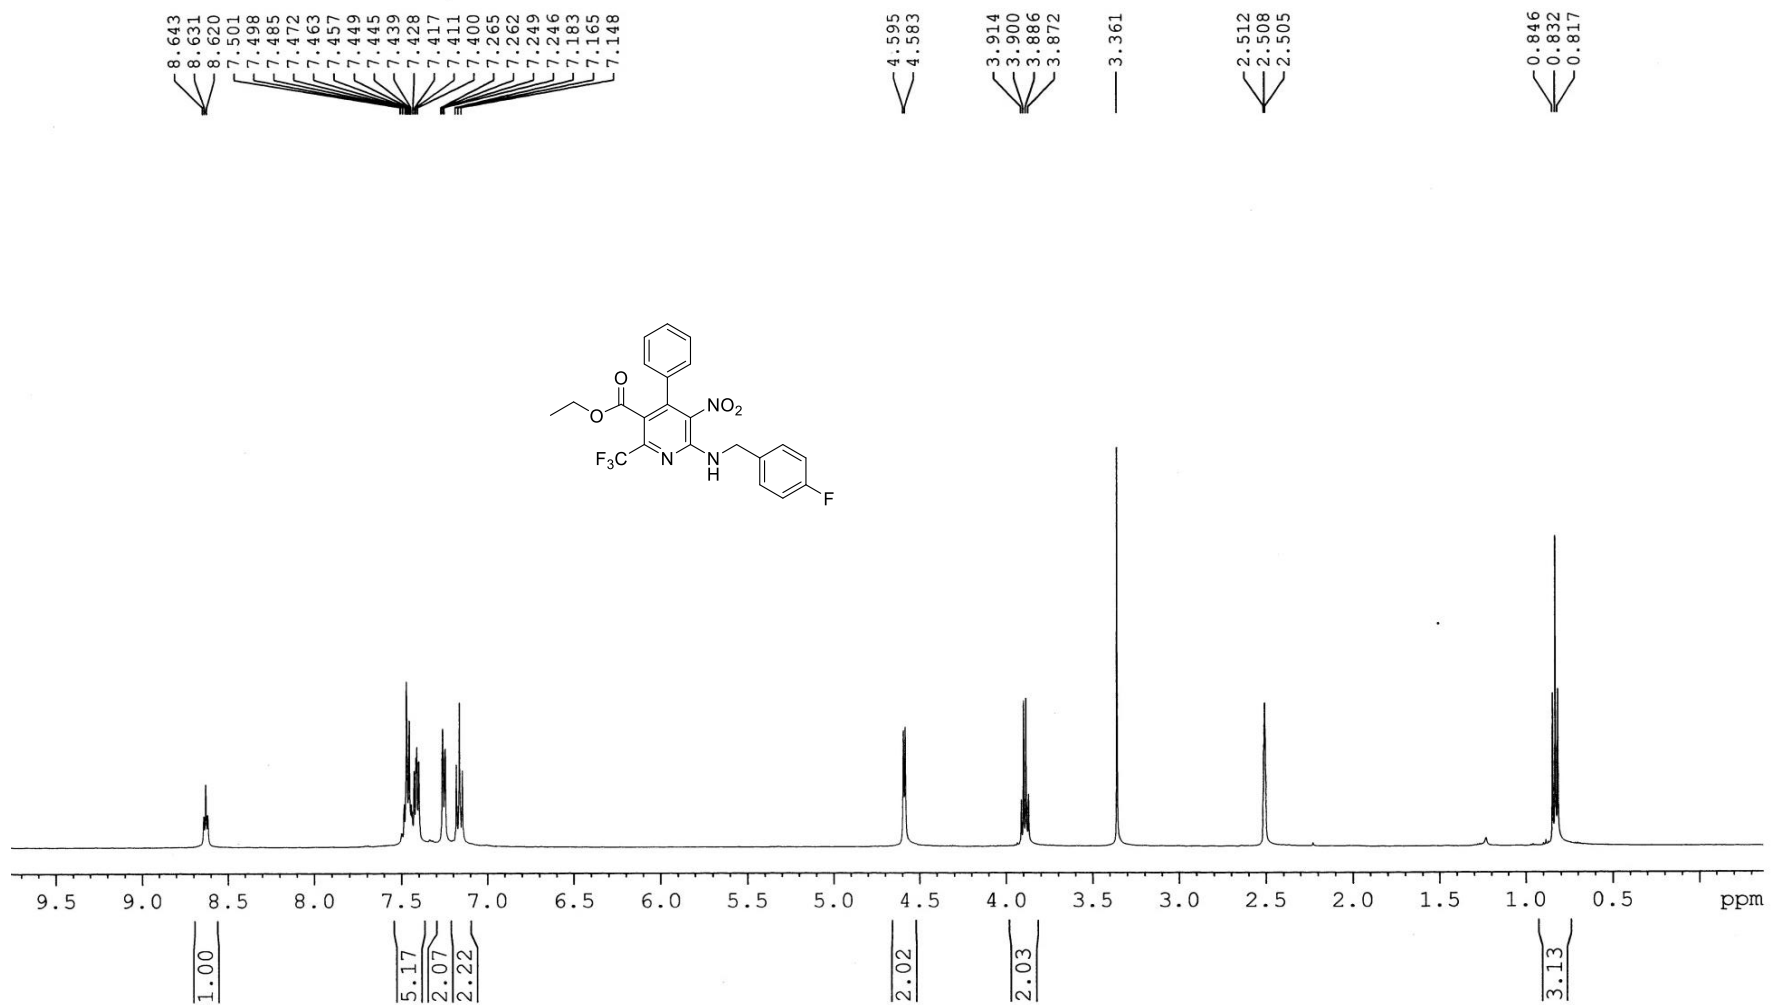

**Figure S24.**  $^1\text{H}$  NMR (500 MHz,  $\text{DMSO-}d_6$ ) spectra of compound **4k**

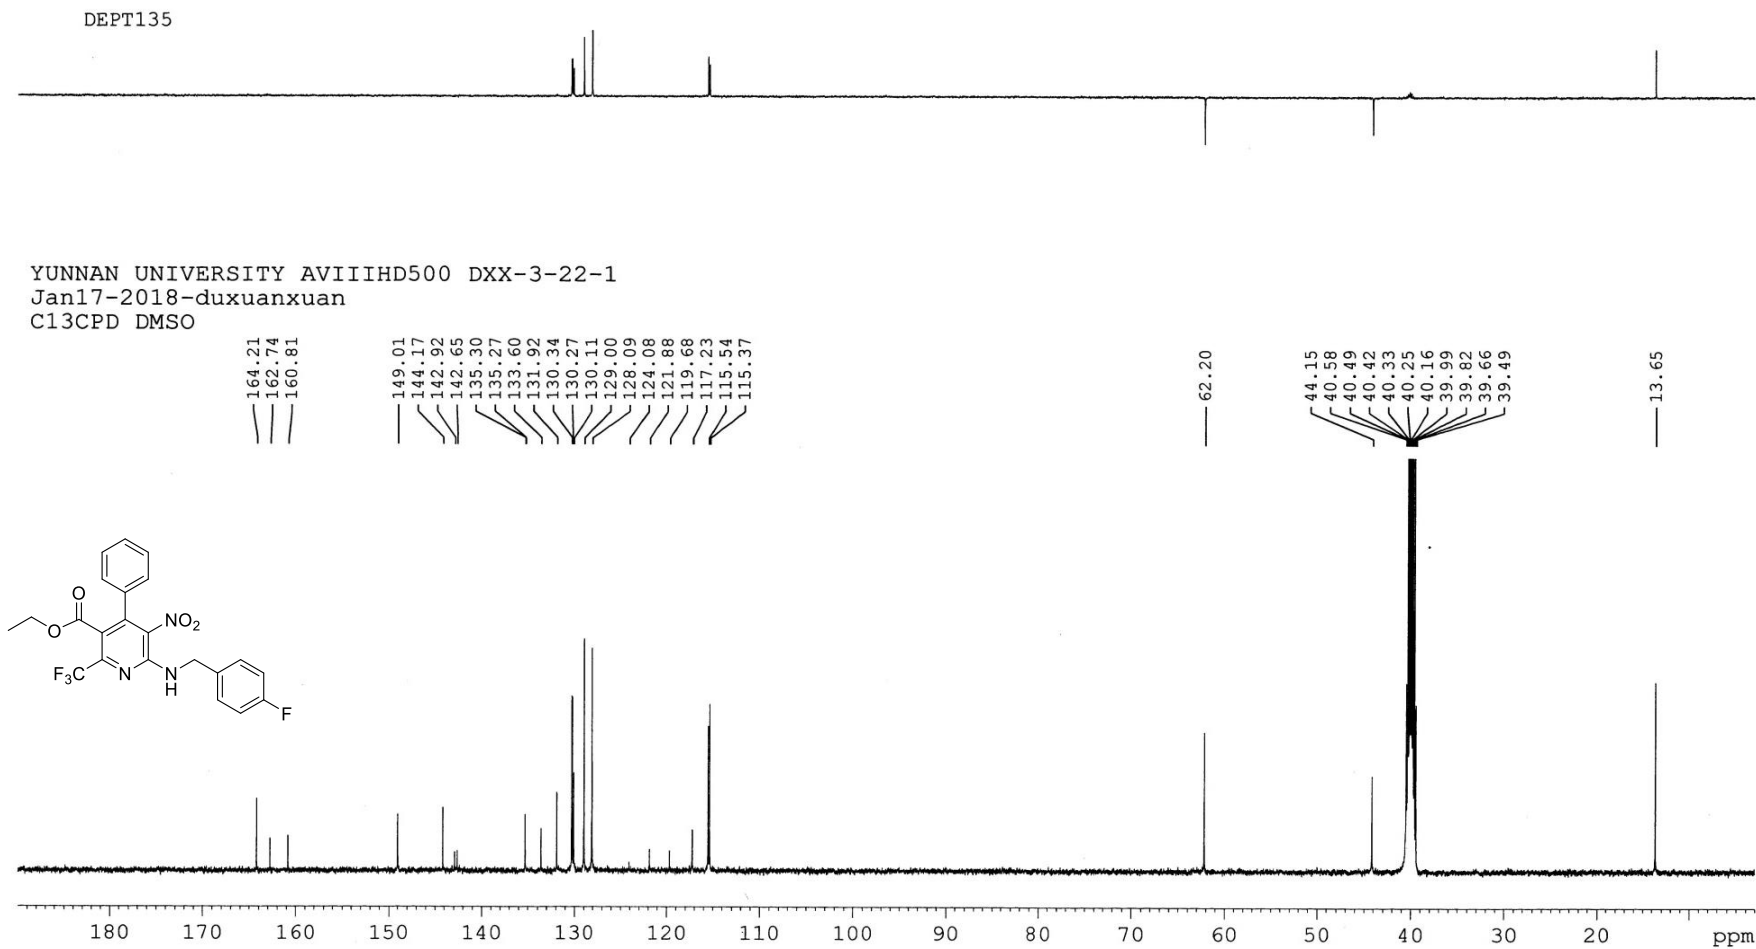

**Figure S25.**  $^{13}\text{C}$  NMR (125 MHz,  $\text{DMSO-}d_6$ ) spectra of compound **4k**

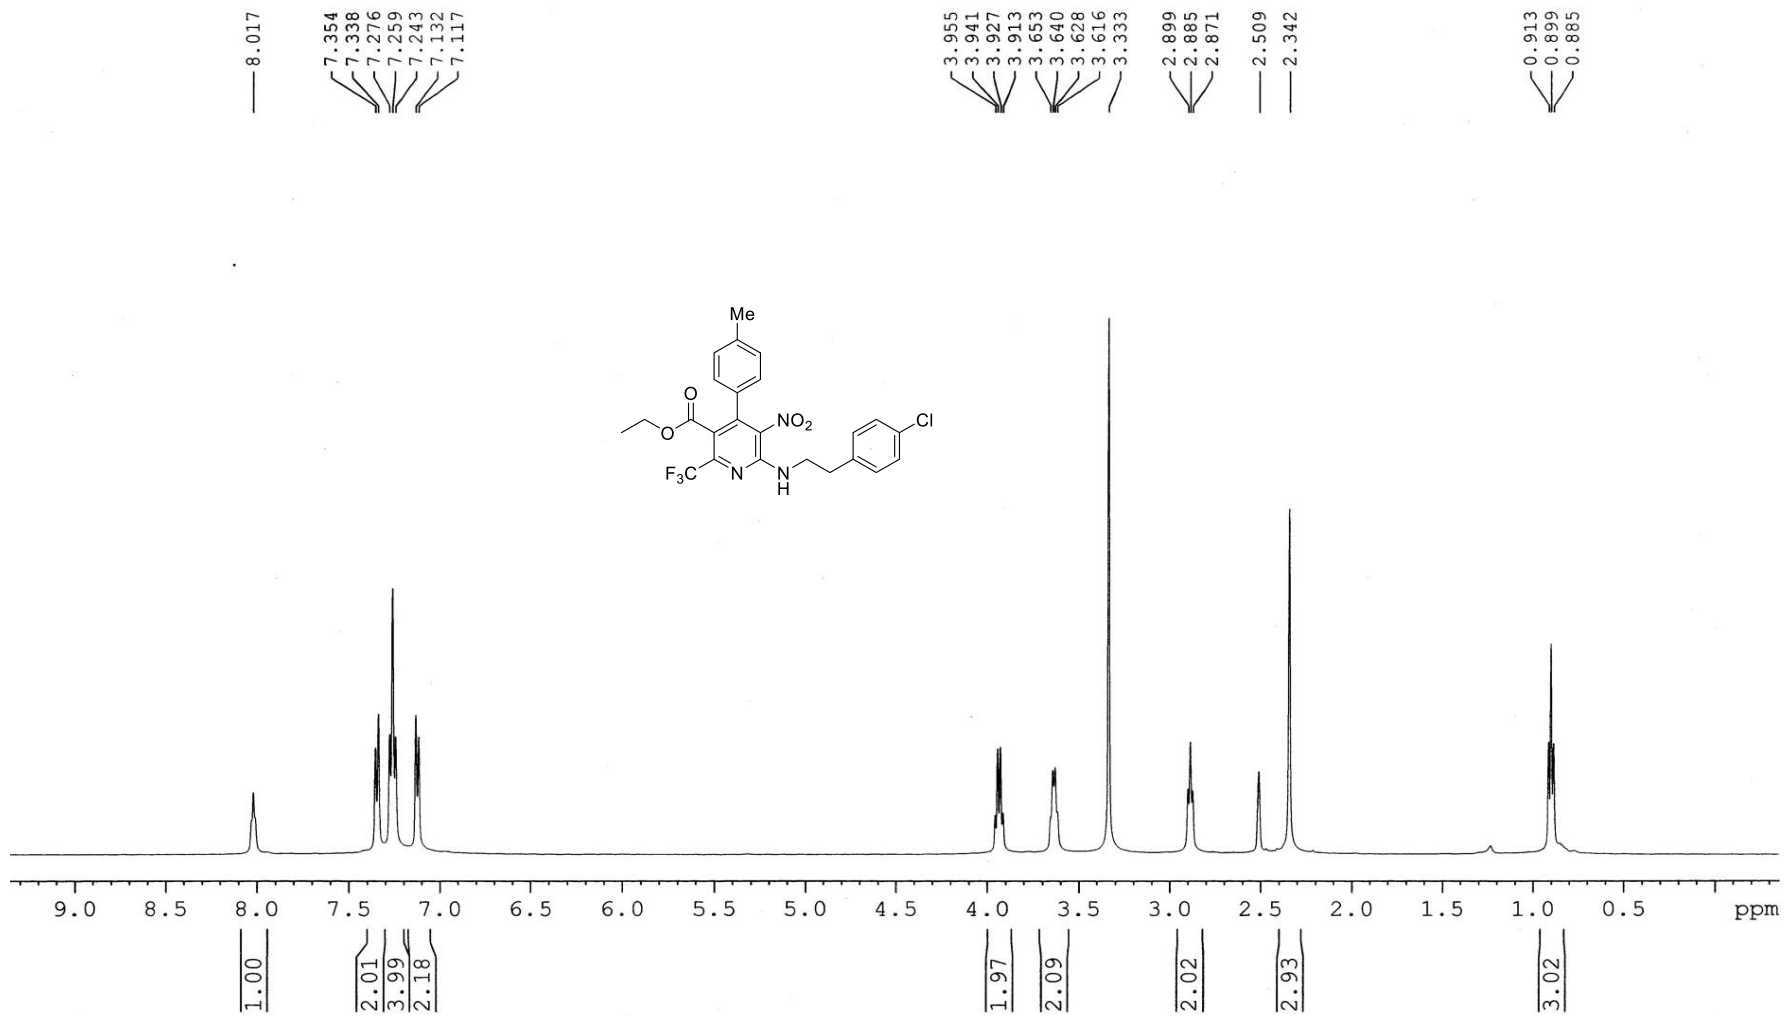

**Figure S26.**  $^1\text{H}$  NMR (500 MHz,  $\text{DMSO-}d_6$ ) spectra of compound **4I**

DEPT135

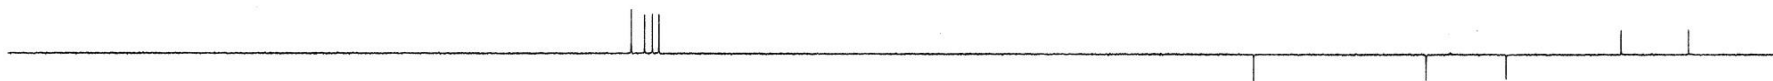

YUNNAN UNIVERSITY AVIIHD500 DXX-3-7-1  
Jun27-2017-duxuanxuan  
C13CPD DMSO

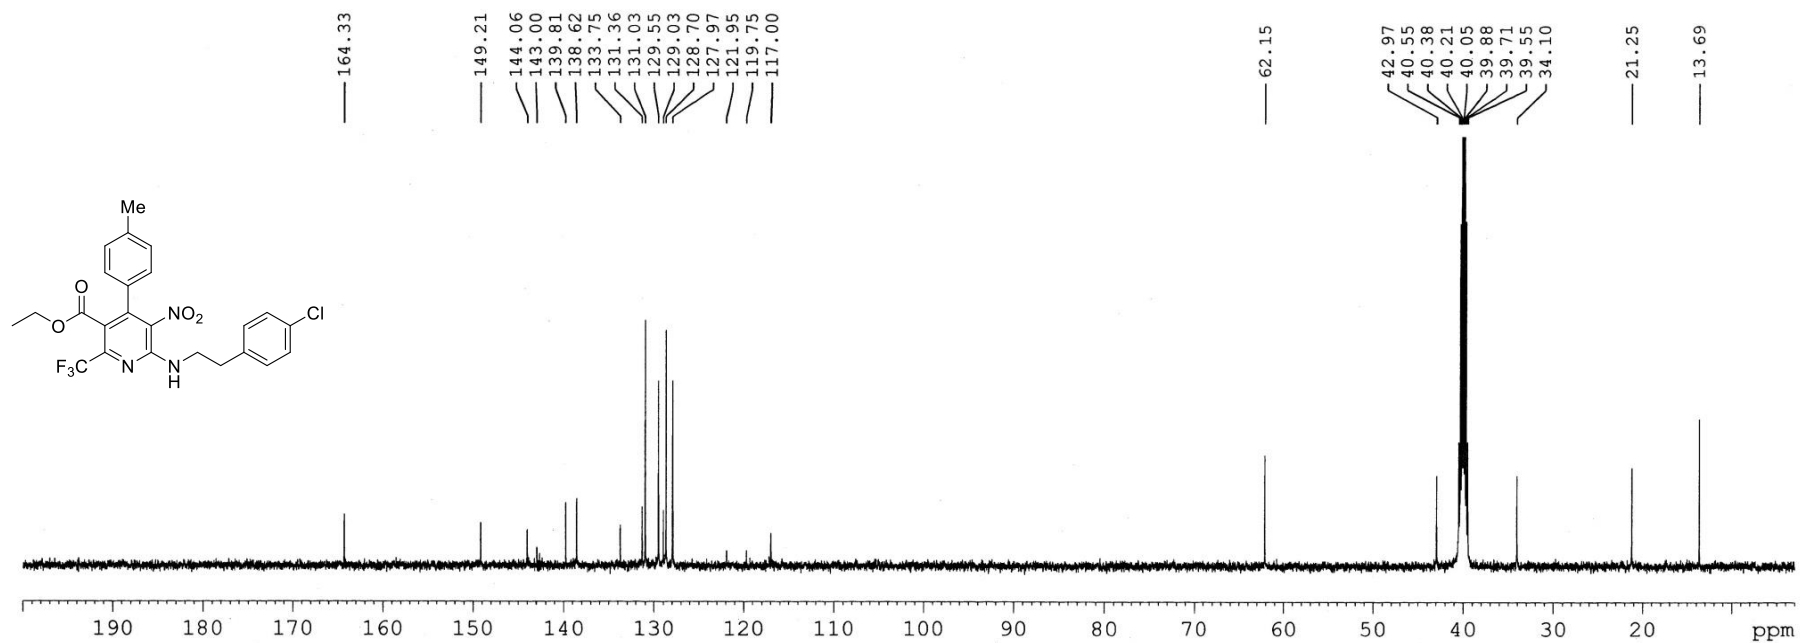

Figure S27.  $^{13}\text{C}$  NMR (125 MHz,  $\text{DMSO-}d_6$ ) spectra of compound 4I

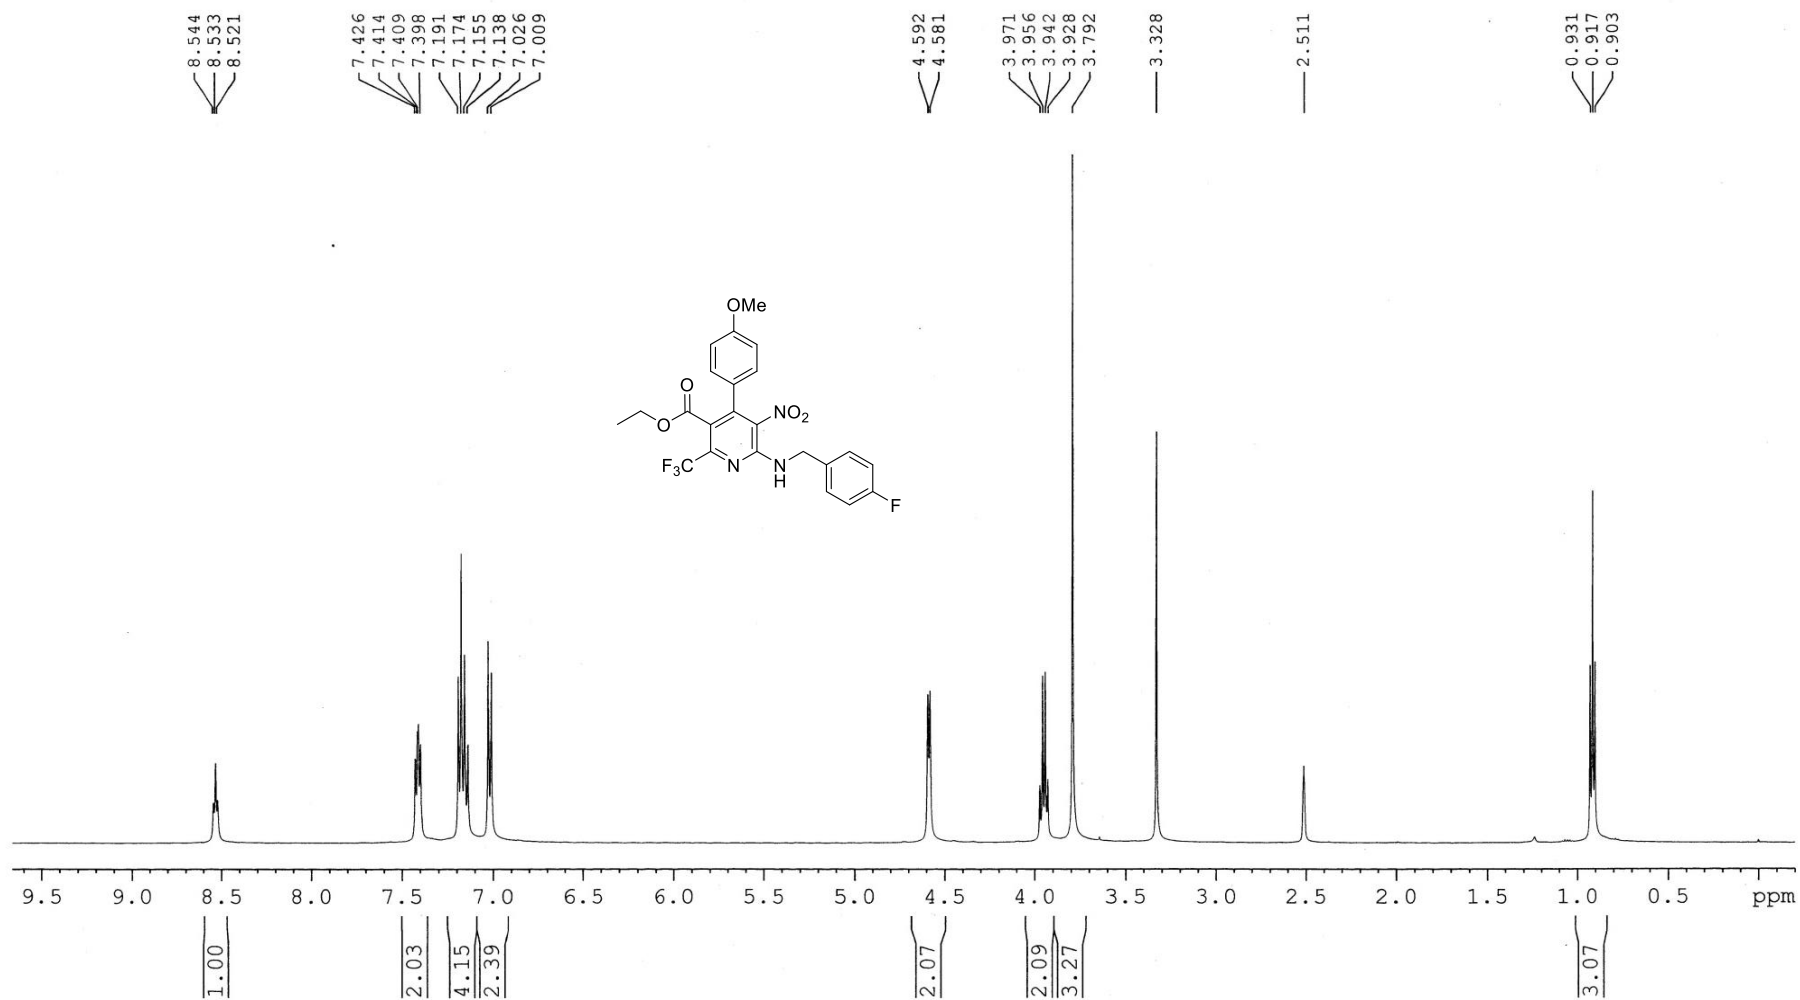

**Figure S28.** <sup>1</sup>H NMR (500 MHz, DMSO-*d*<sub>6</sub>) spectra of compound **4m**

DEPT135

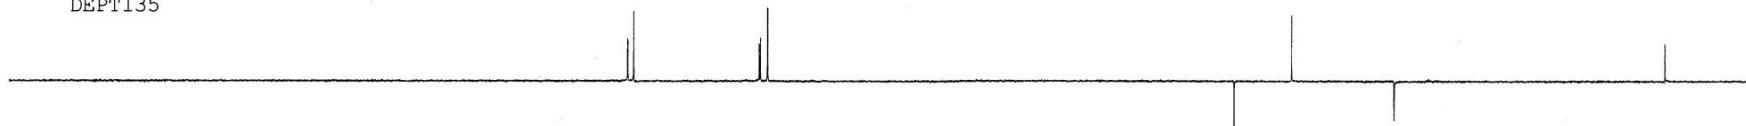

YUNNAN UNIVERSITY AVIIIHD500 DXX-3-25-1  
Sep23-2017-duxuanxuan  
C13CPD DMSO

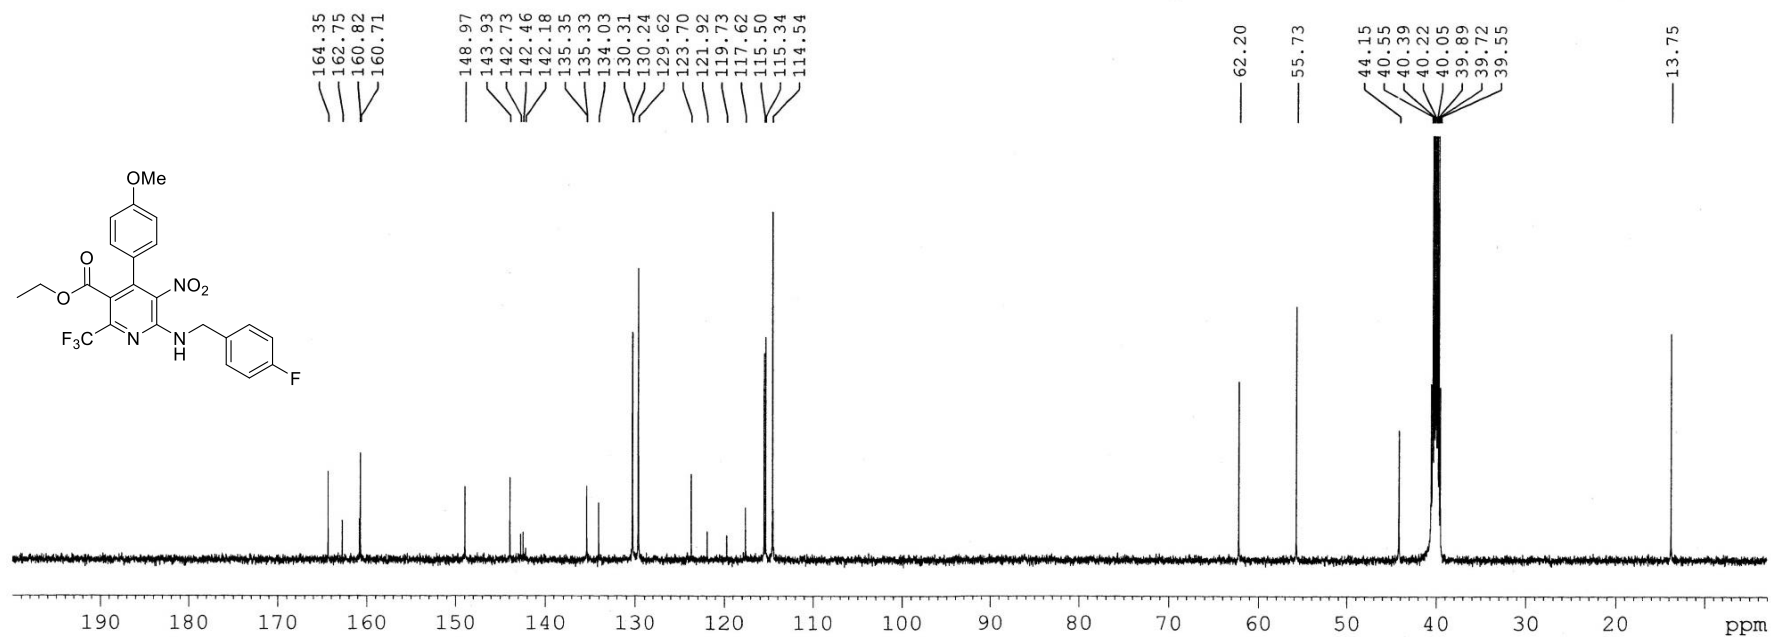

Figure S29.  $^{13}\text{C}$  NMR (125 MHz,  $\text{DMSO-}d_6$ ) spectra of compound 4m



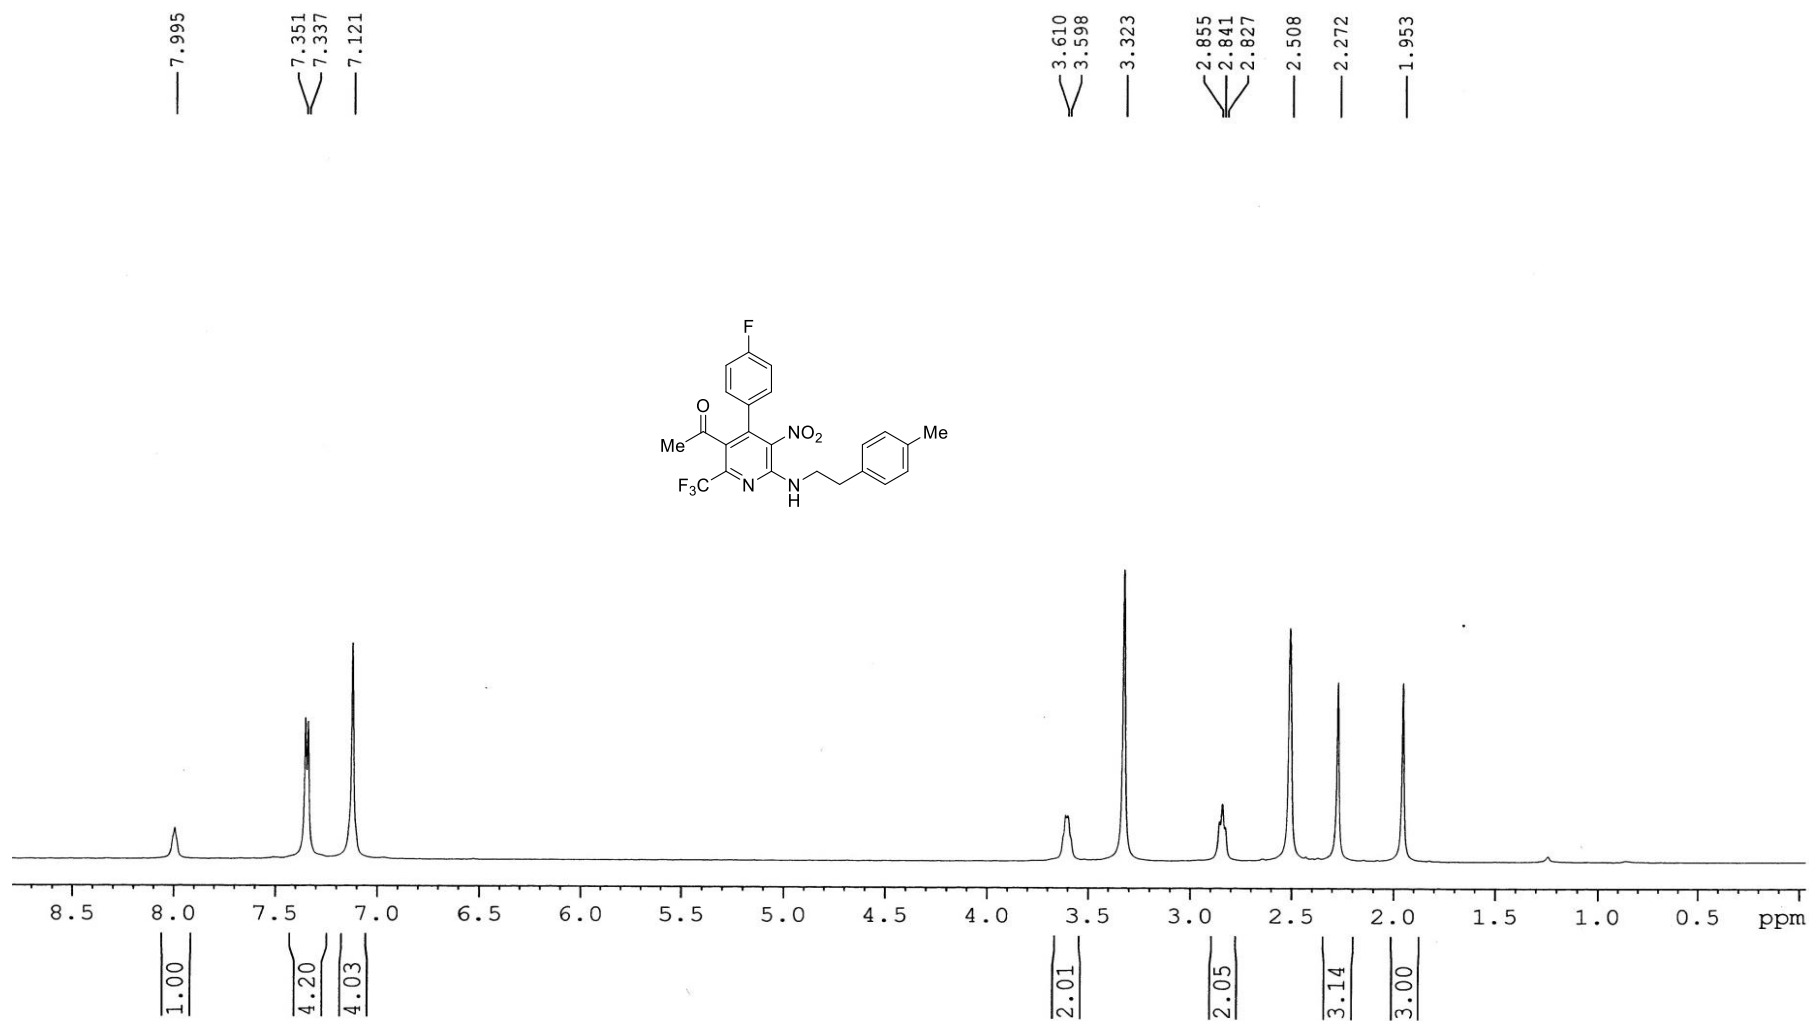

**Figure S30.**  $^1\text{H}$  NMR (500 MHz,  $\text{DMSO-}d_6$ ) spectra of compound **4n**

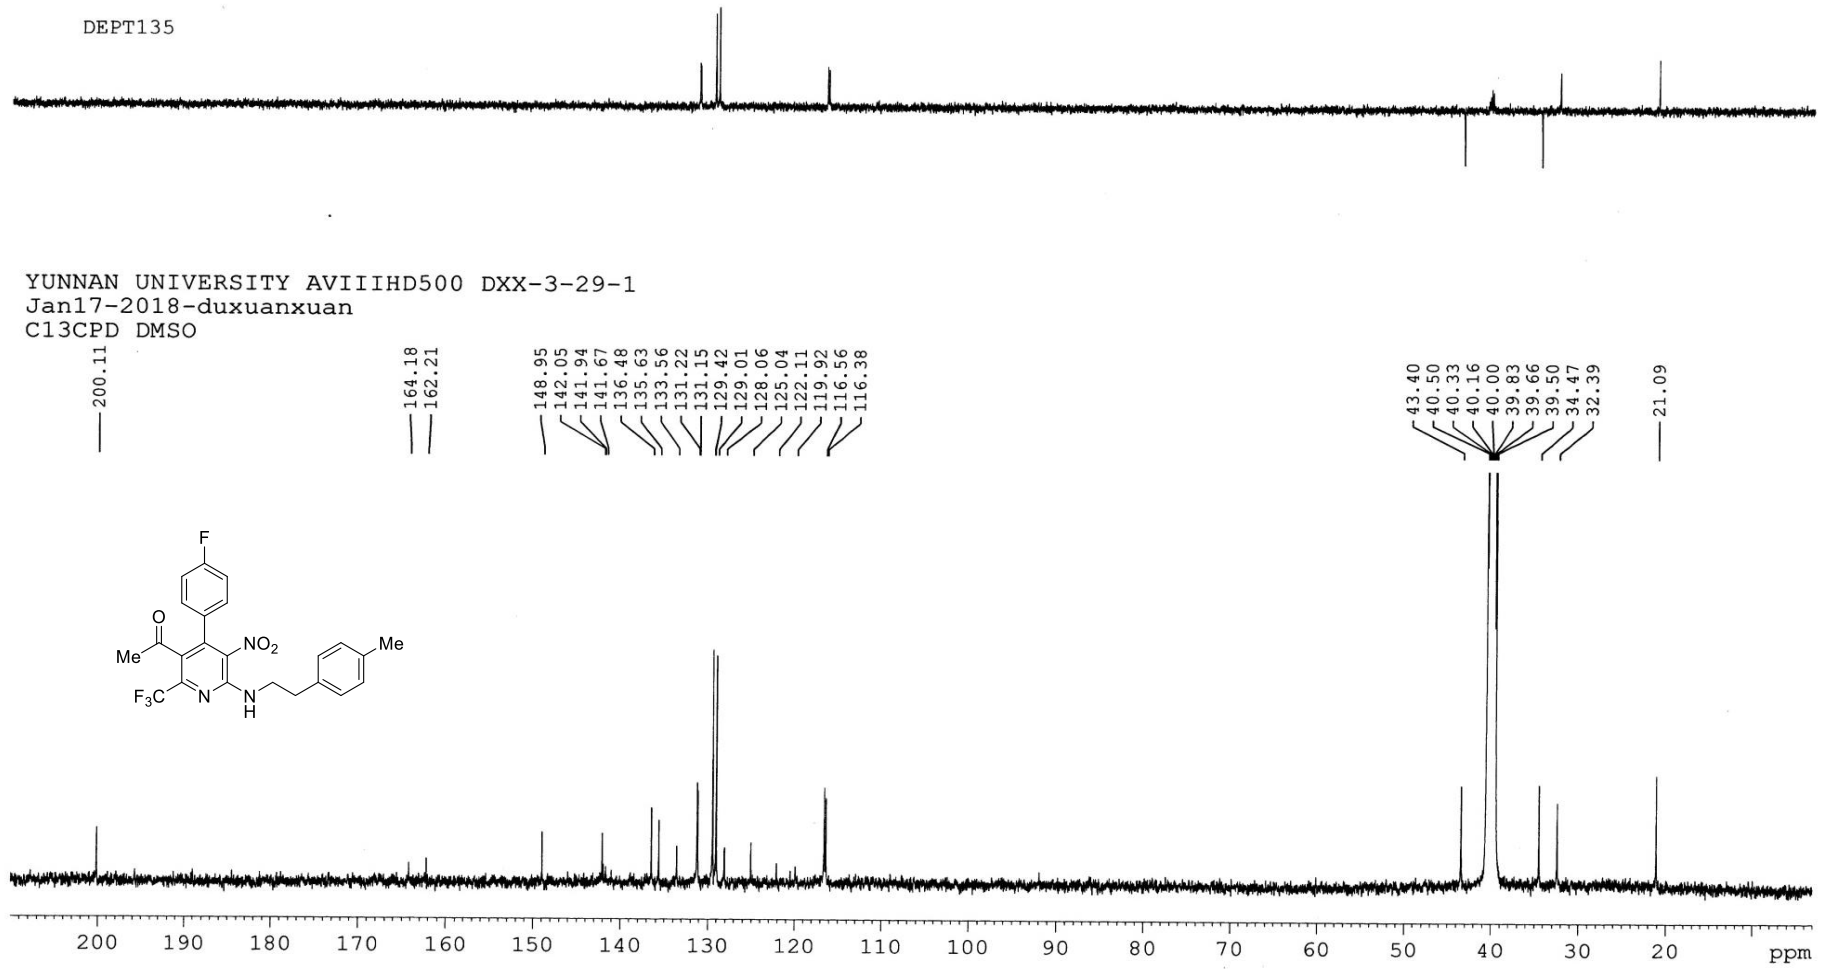

Figure S31. <sup>13</sup>C NMR (125 MHz, DMSO-*d*<sub>6</sub>) spectra of compound 4n

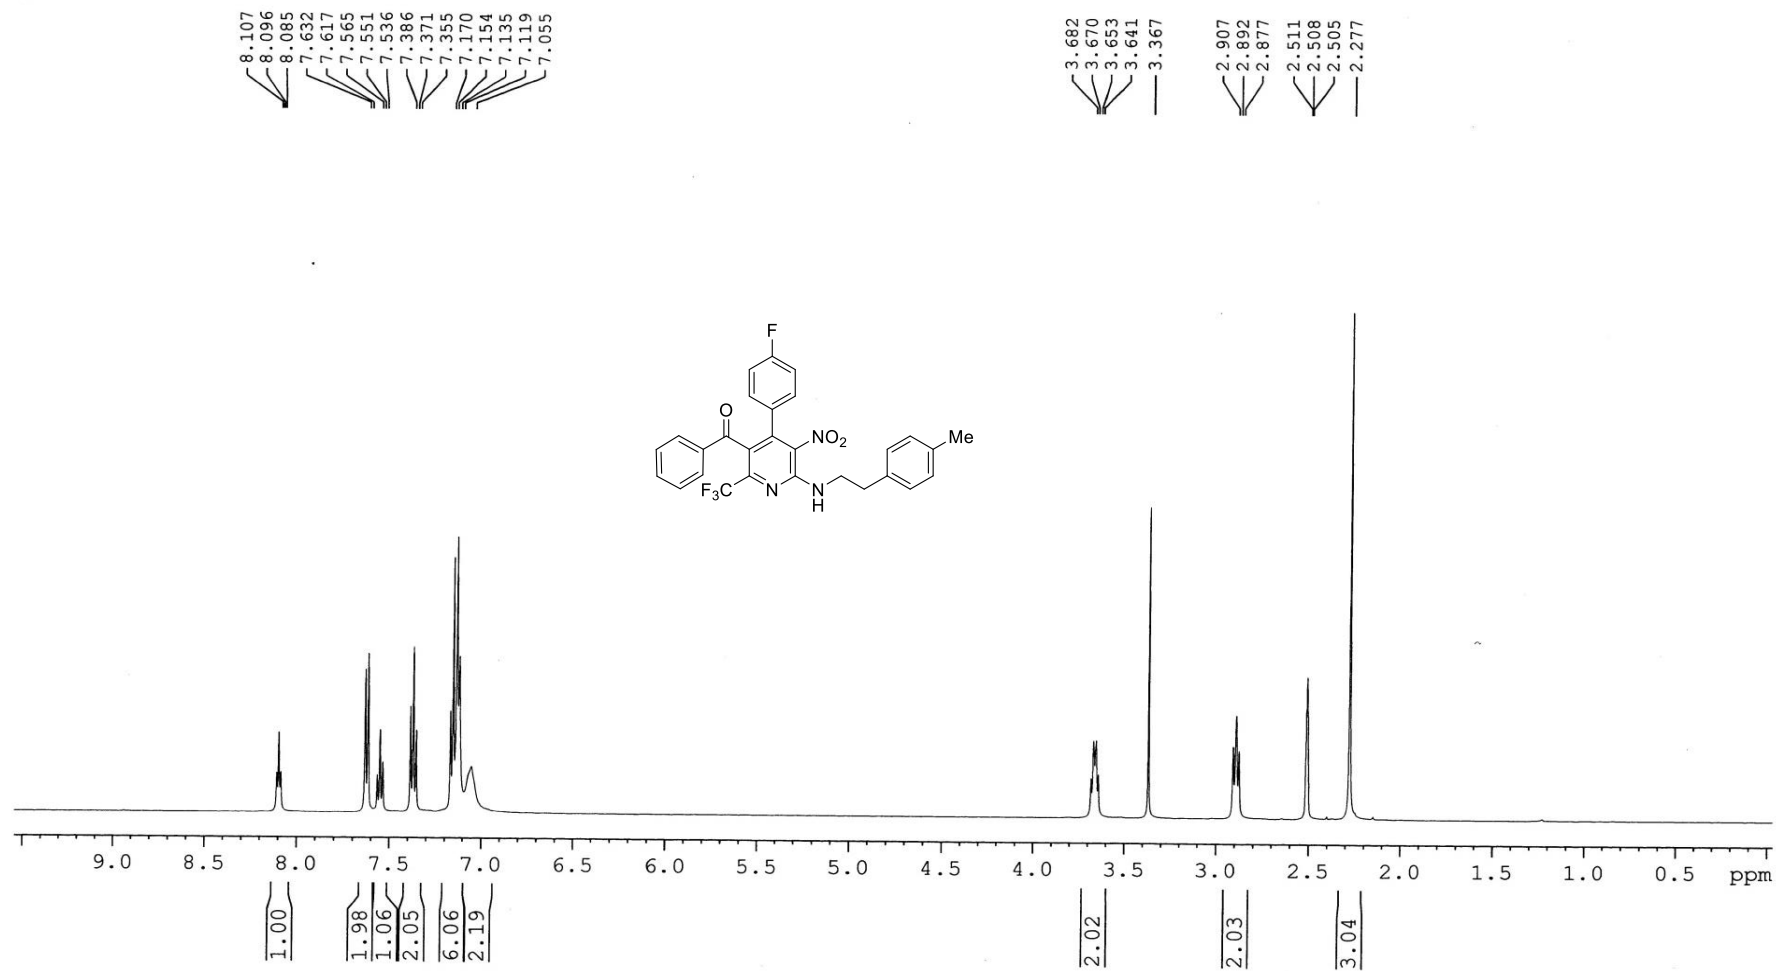

**Figure S32.** <sup>1</sup>H NMR (500 MHz, DMSO-*d*<sub>6</sub>) spectra of compound **4o**

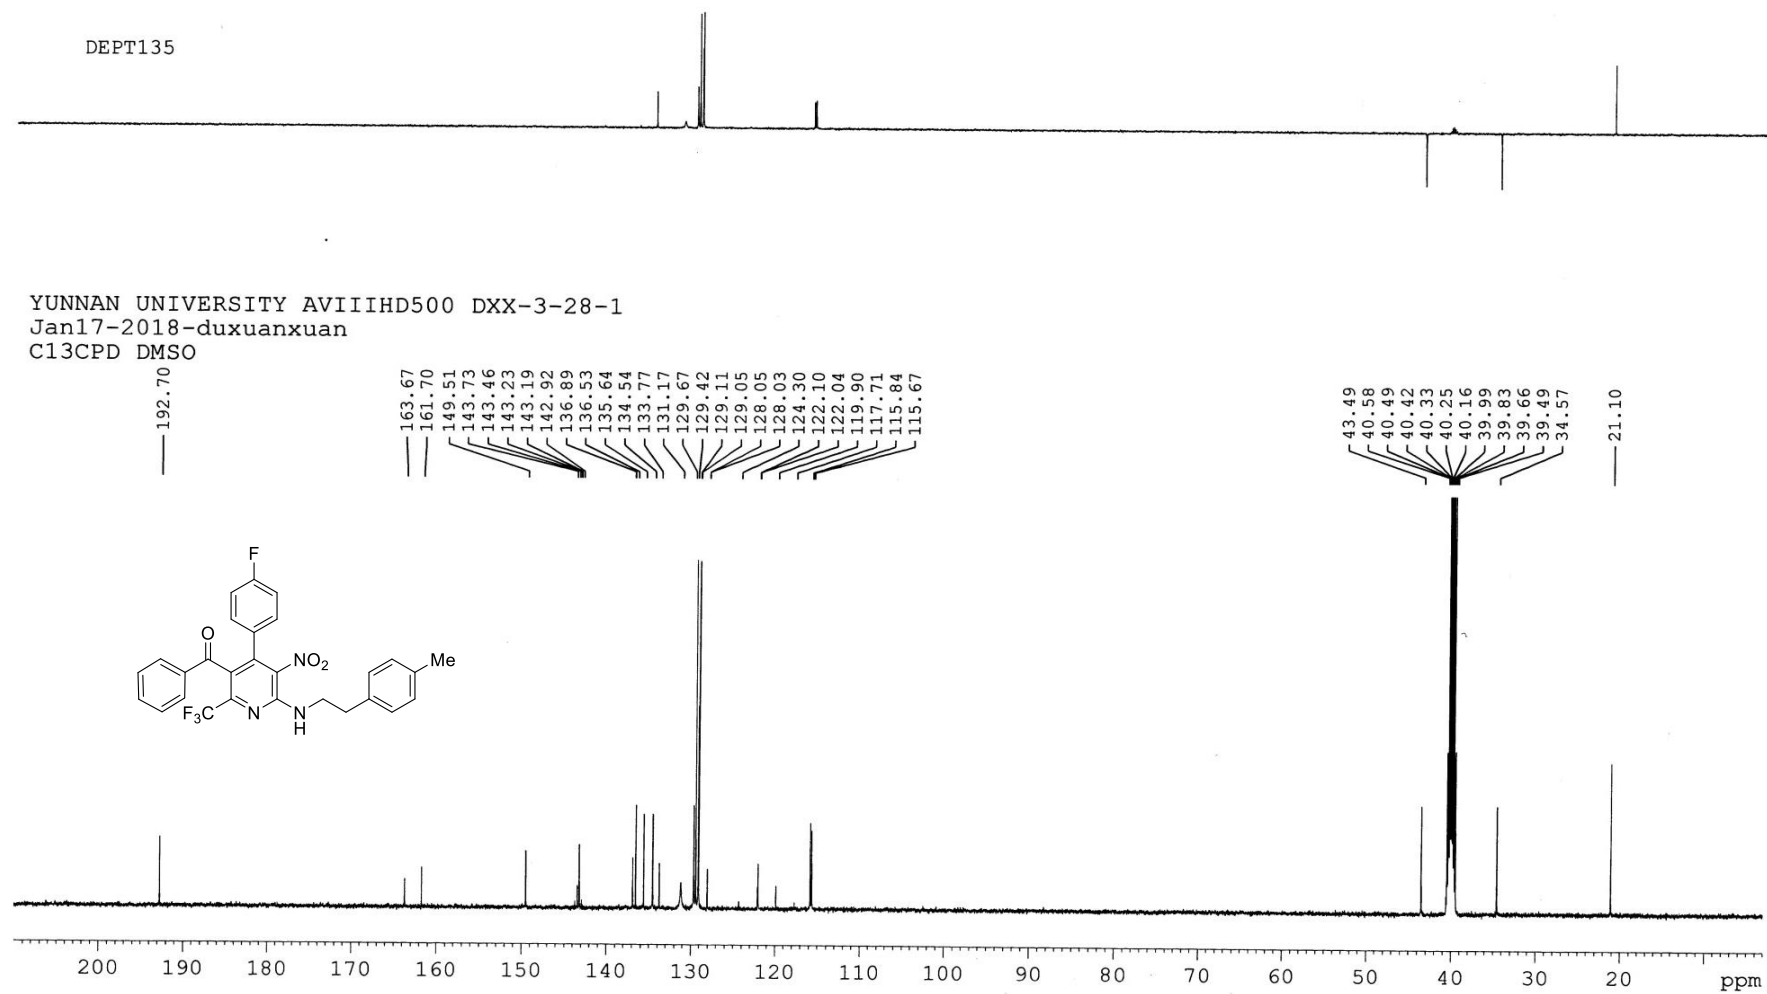

**Figure S33.**  $^{13}\text{C}$  NMR (125 MHz,  $\text{DMSO-}d_6$ ) spectra of compound **4o**

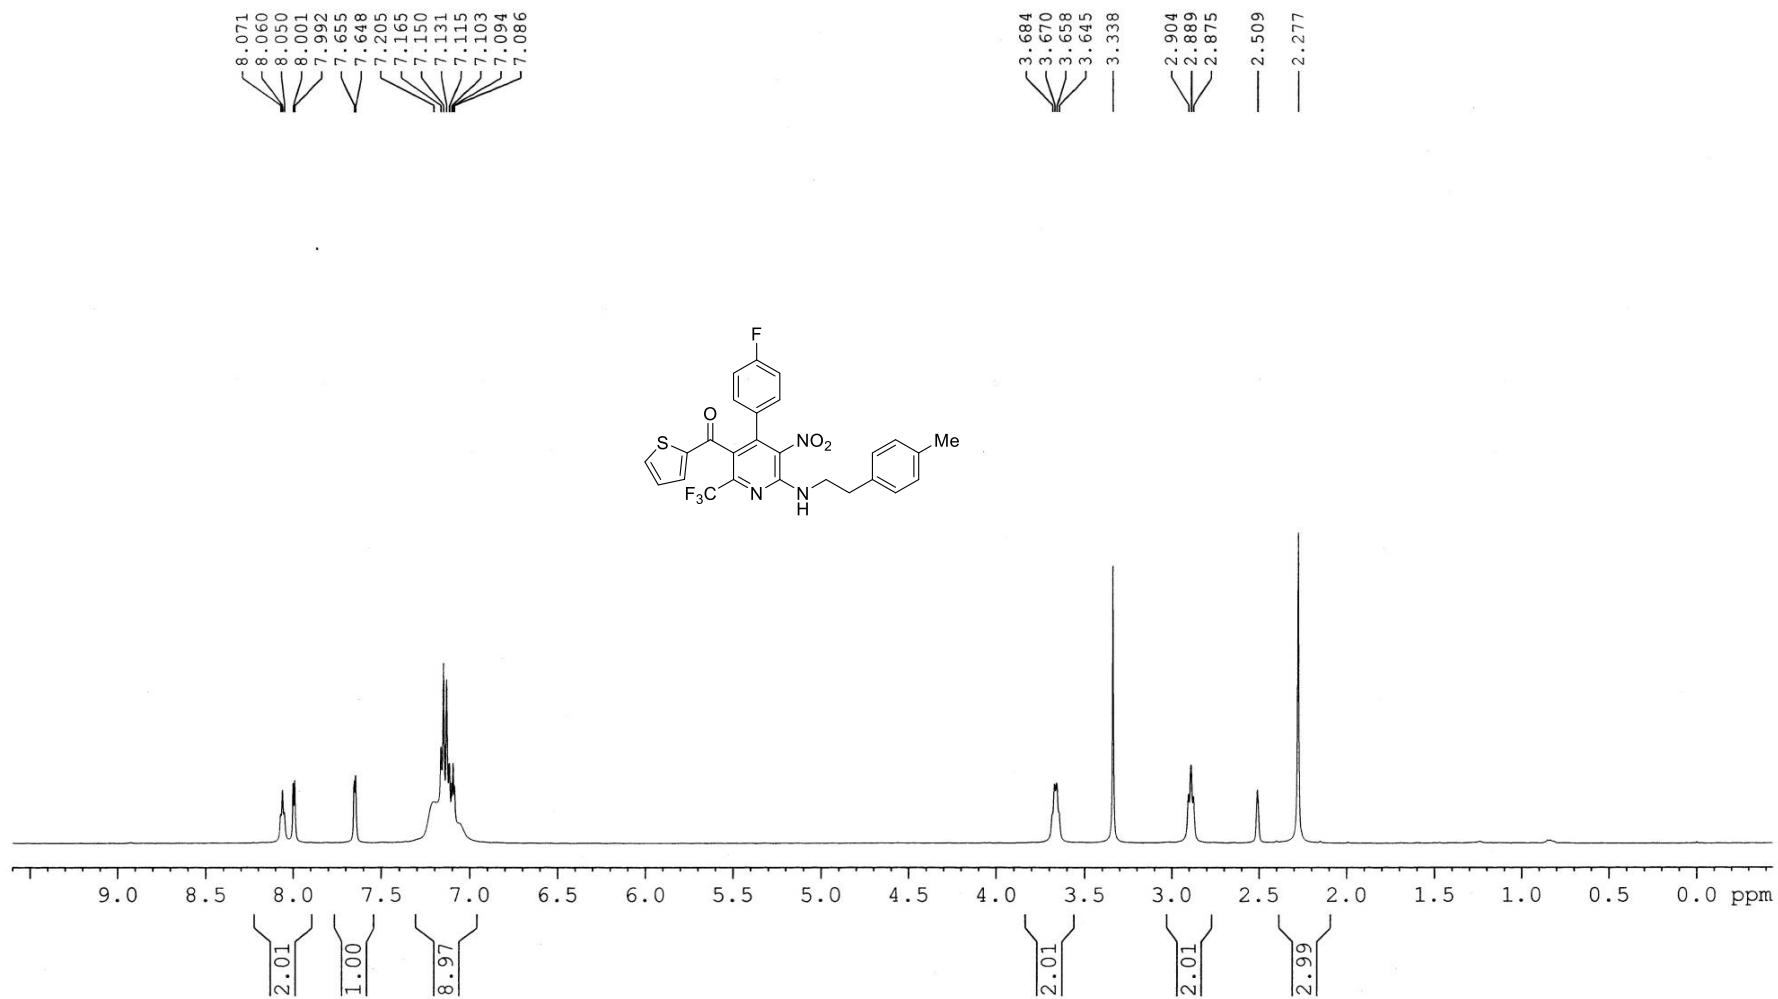

**Figure S34.** <sup>1</sup>H NMR (500 MHz, DMSO-*d*<sub>6</sub>) spectra of compound **4p**

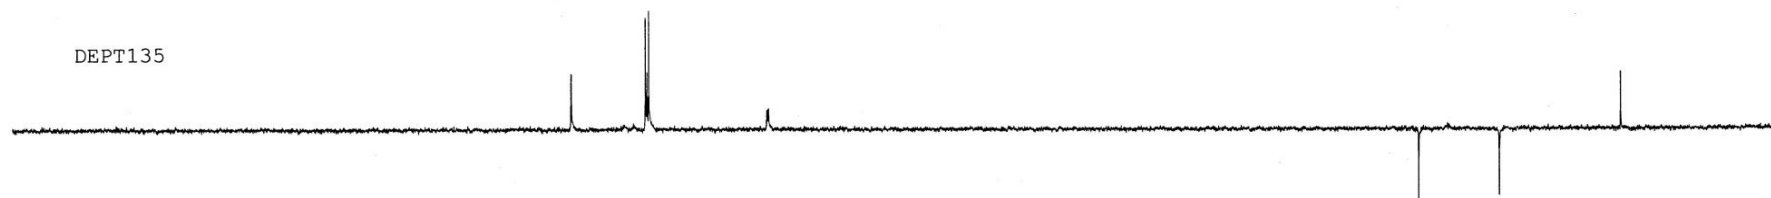

YUNNAN UNIVERSITY AVIIIHD500 DXX-3-27-1  
Sep23-2017-duxuanxuan  
C13CPD DMSO

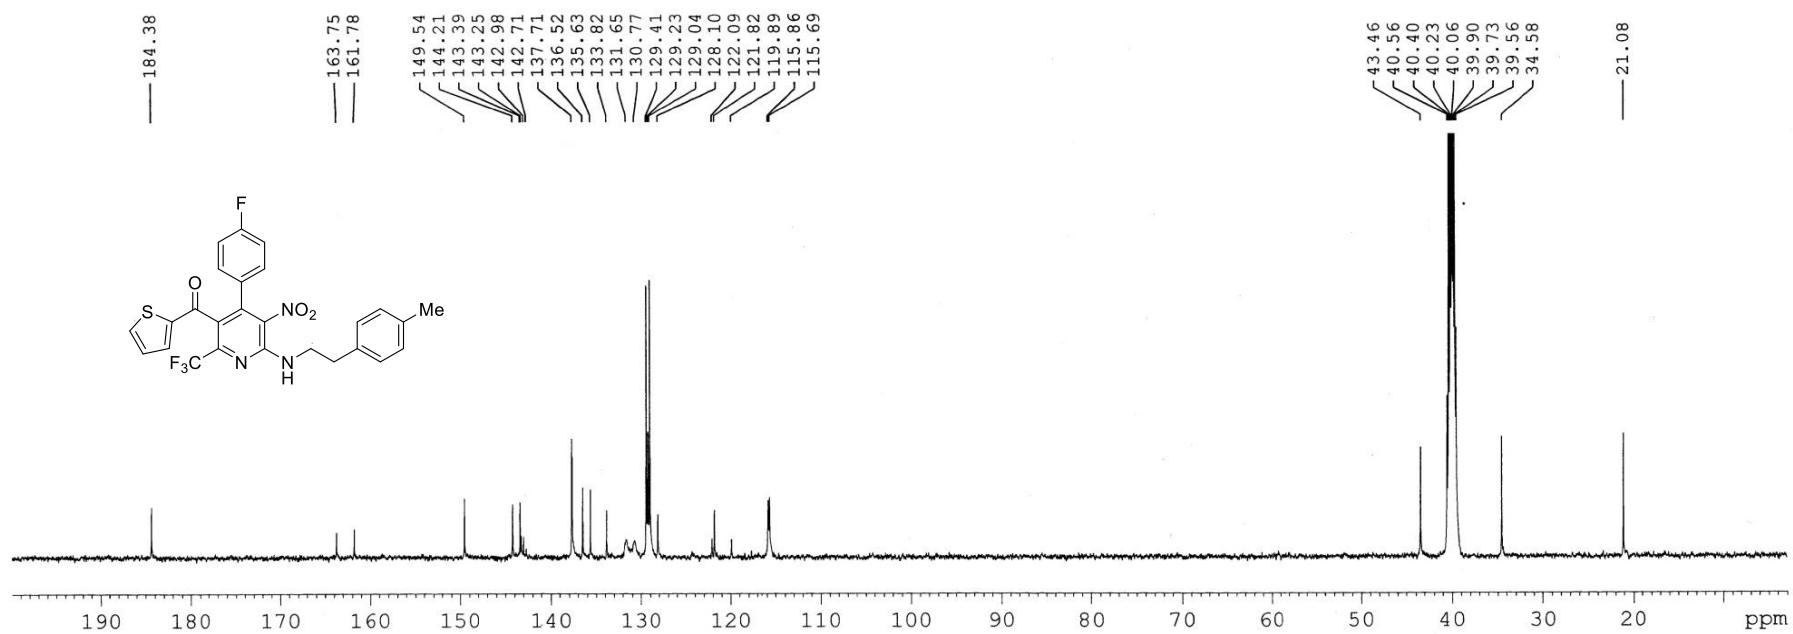

Figure S35.  $^{13}\text{C}$  NMR (125 MHz,  $\text{DMSO-}d_6$ ) spectra of compound **4p**

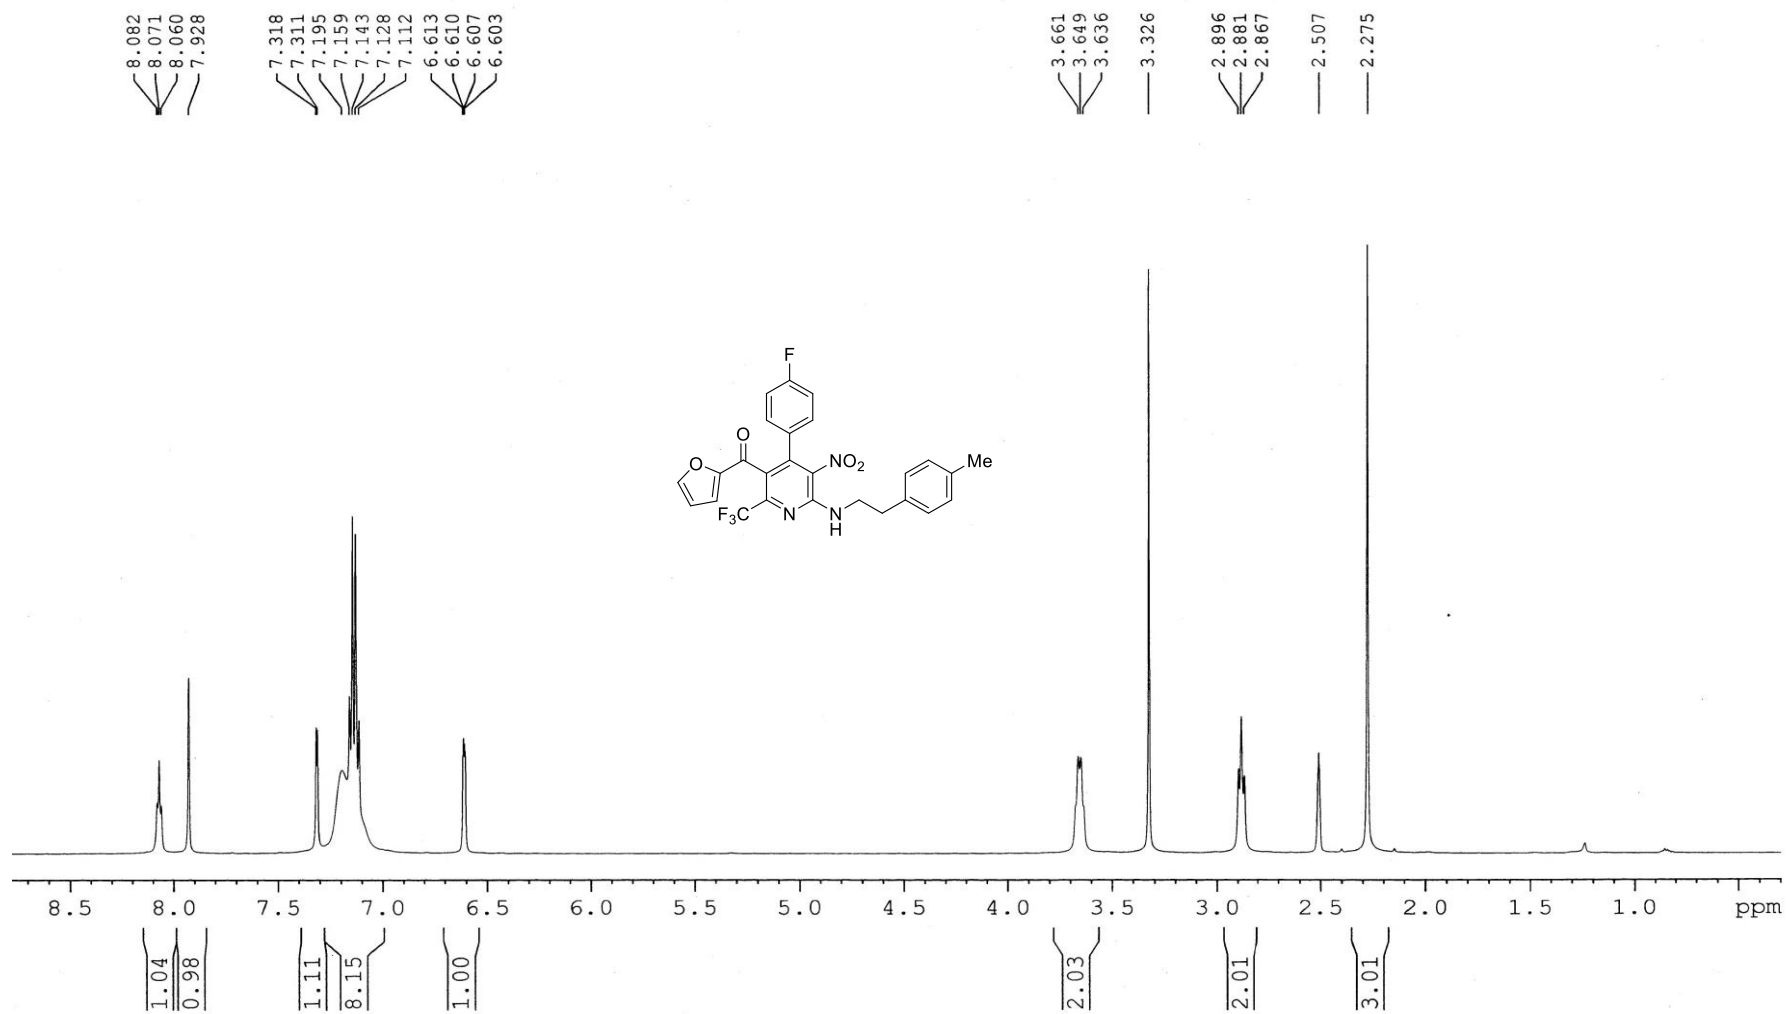

**Figure S36.** <sup>1</sup>H NMR (500 MHz, DMSO-*d*<sub>6</sub>) spectra of compound 4q

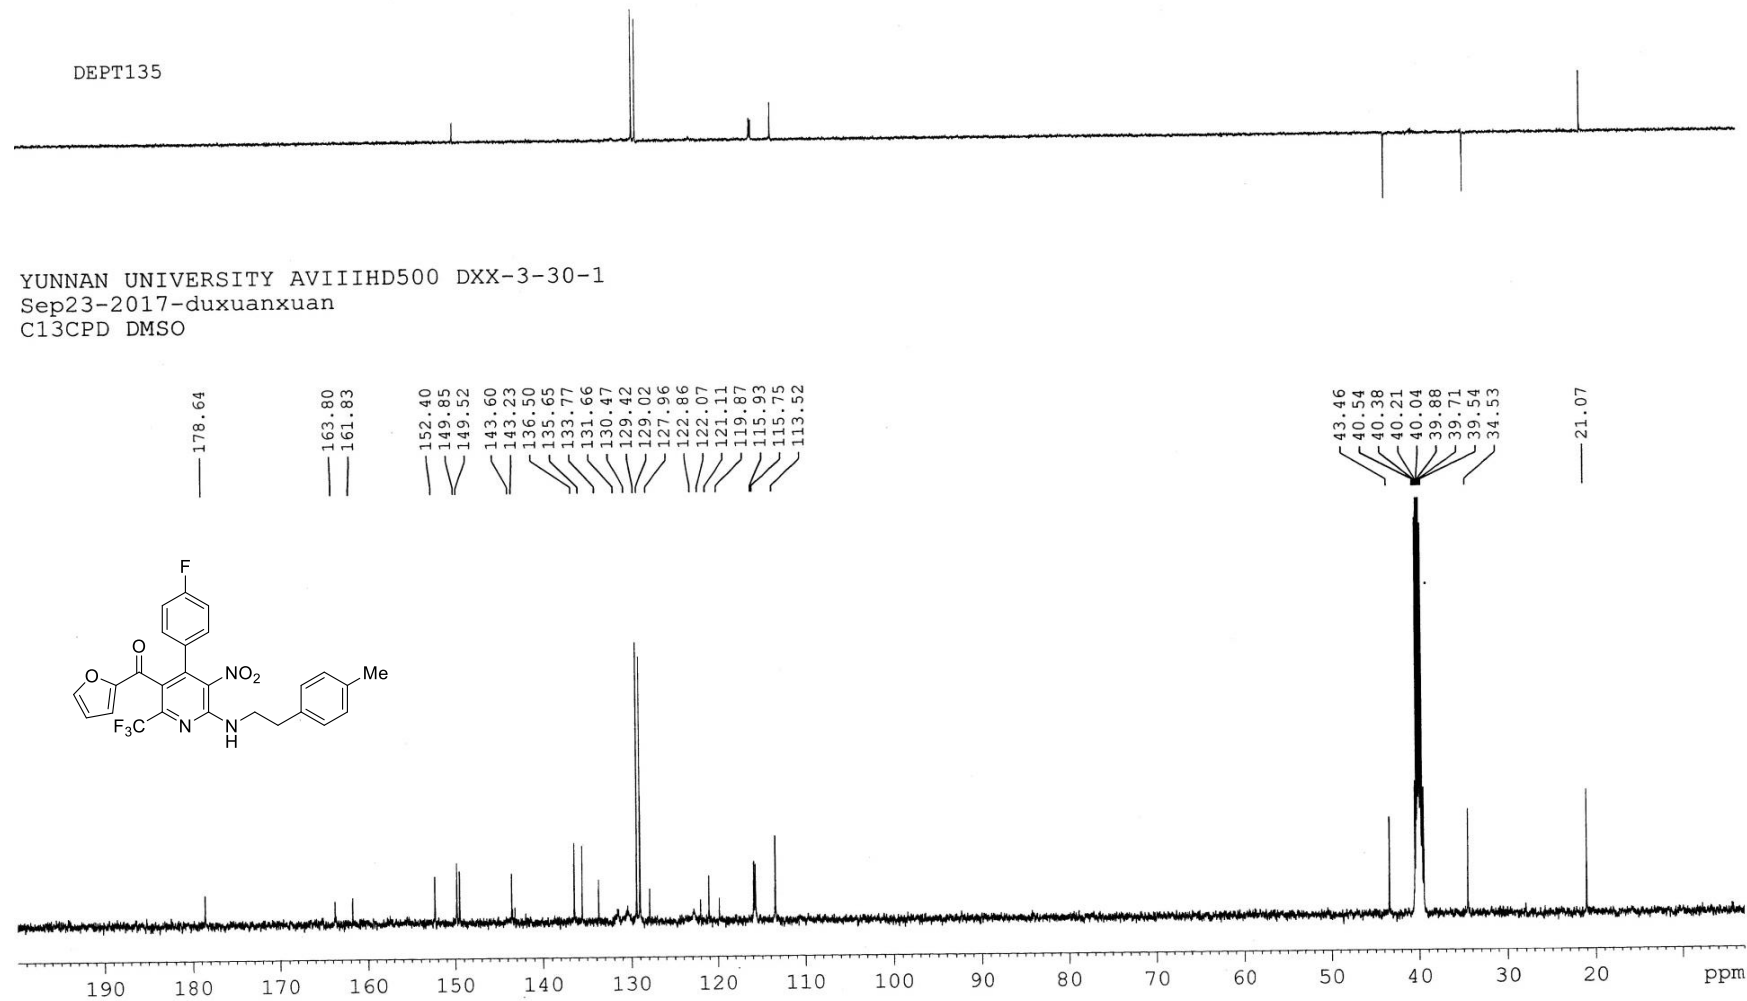

Figure S37. <sup>13</sup>C NMR (125 MHz, DMSO-*d*<sub>6</sub>) spectra of compound 4q



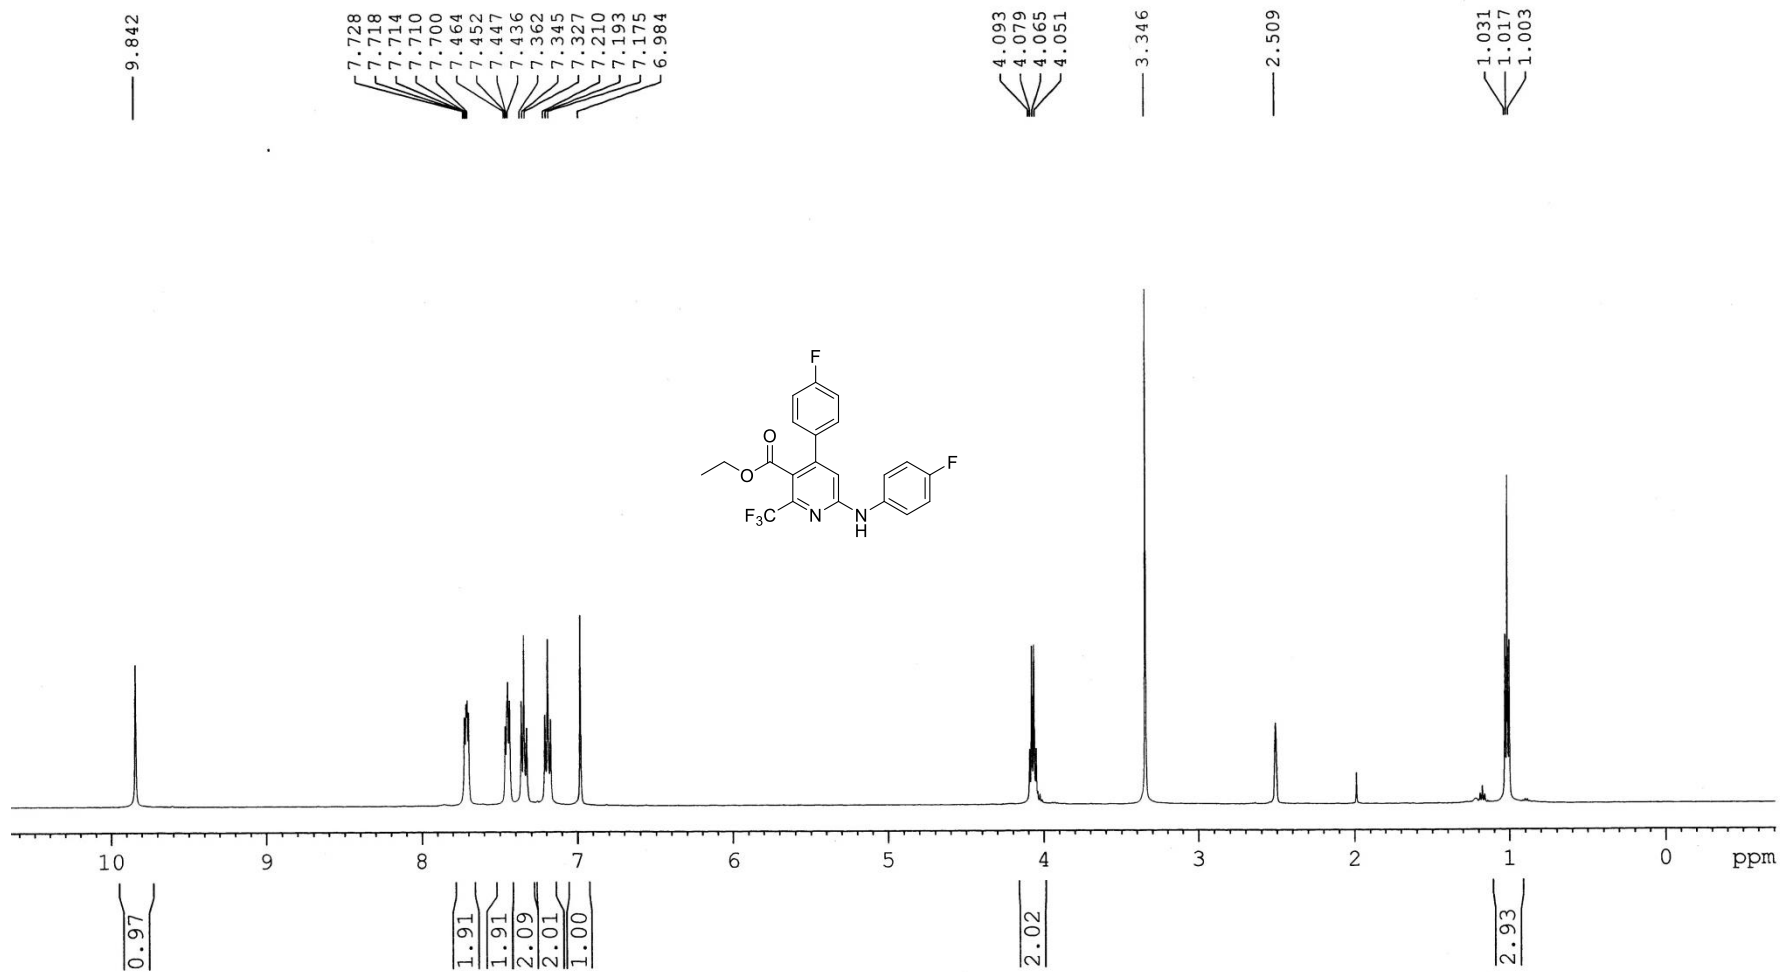

**Figure S38.** <sup>1</sup>H NMR (500 MHz, DMSO-*d*<sub>6</sub>) spectra of compound **5a**

DEPT135

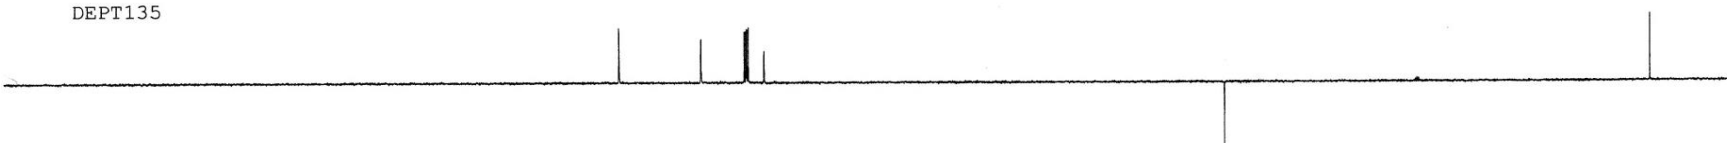

YUNNAN UNIVERSITY AVIIIHD500 DXX-3-6-2  
Jun23-2017-duxuanxuan  
C13CPD DMSO

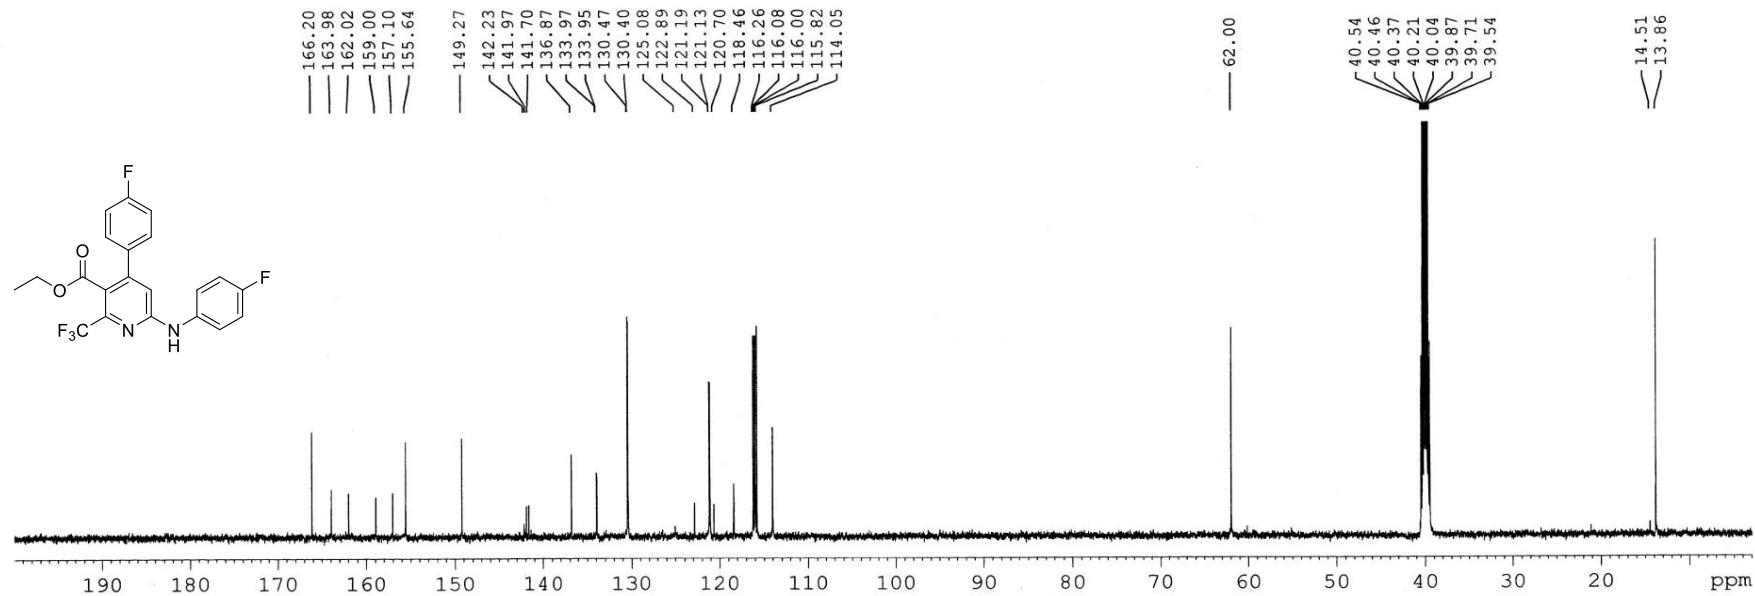

Figure S39. <sup>13</sup>C NMR (125 MHz, DMSO-*d*<sub>6</sub>) spectra of compound 5a

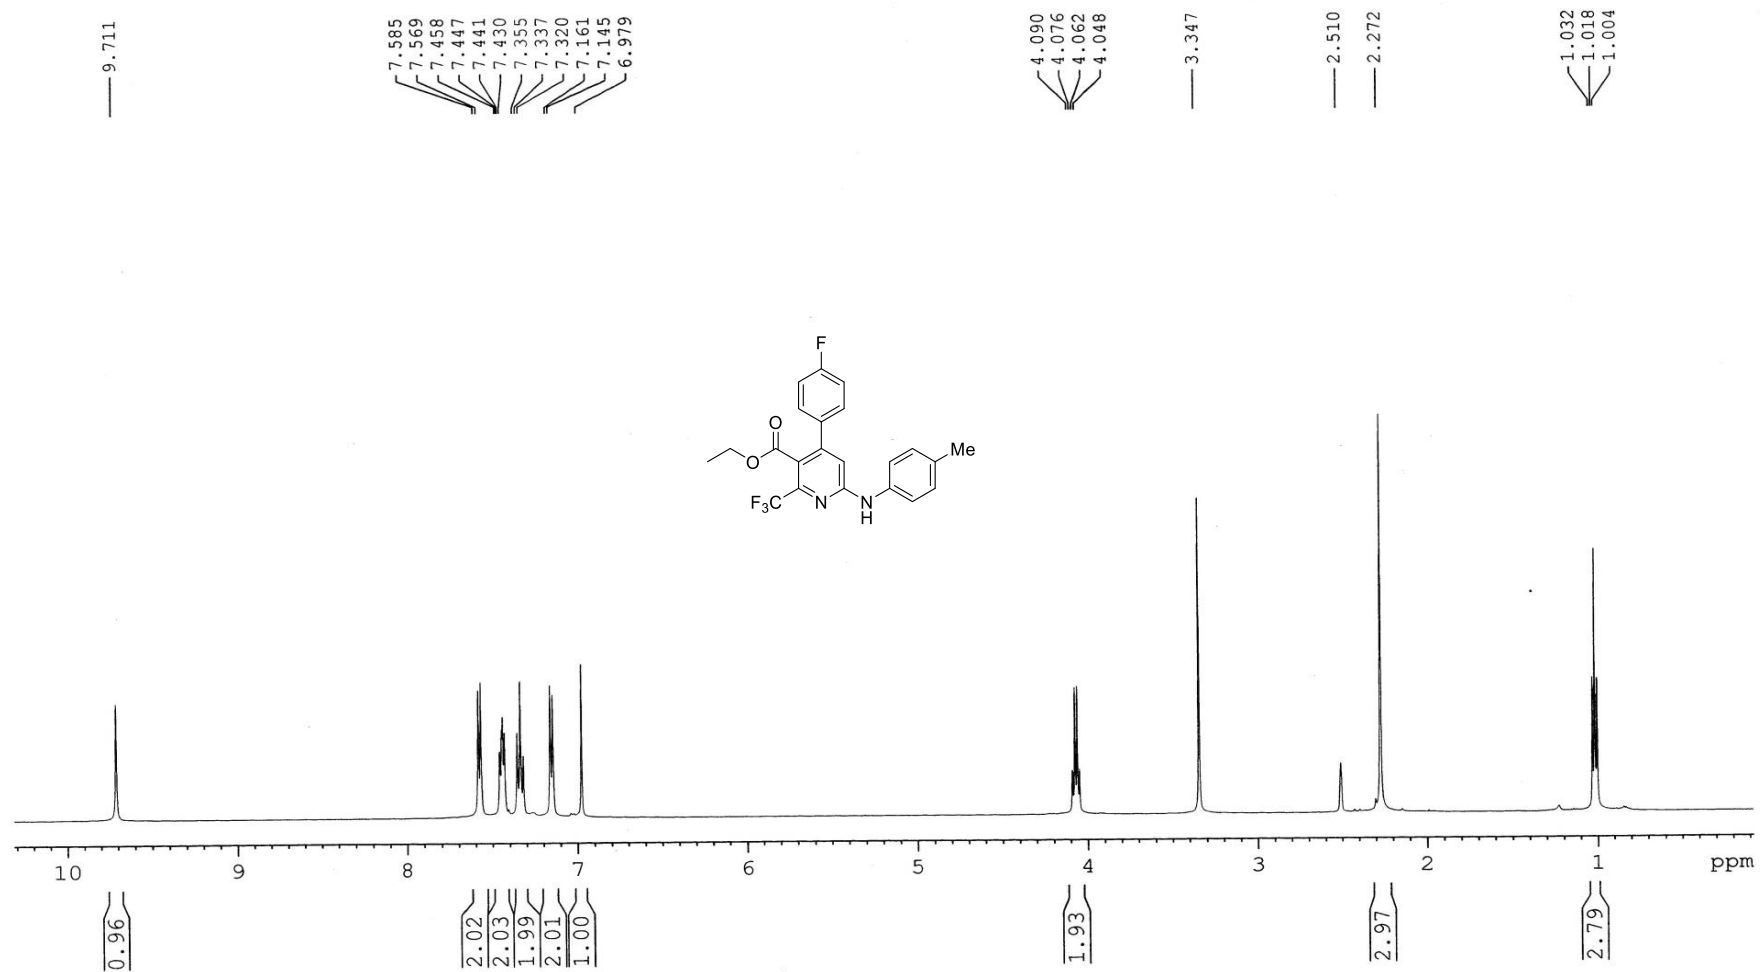

**Figure S40.**  $^1\text{H}$  NMR (500 MHz,  $\text{DMSO-}d_6$ ) spectra of compound **5b**

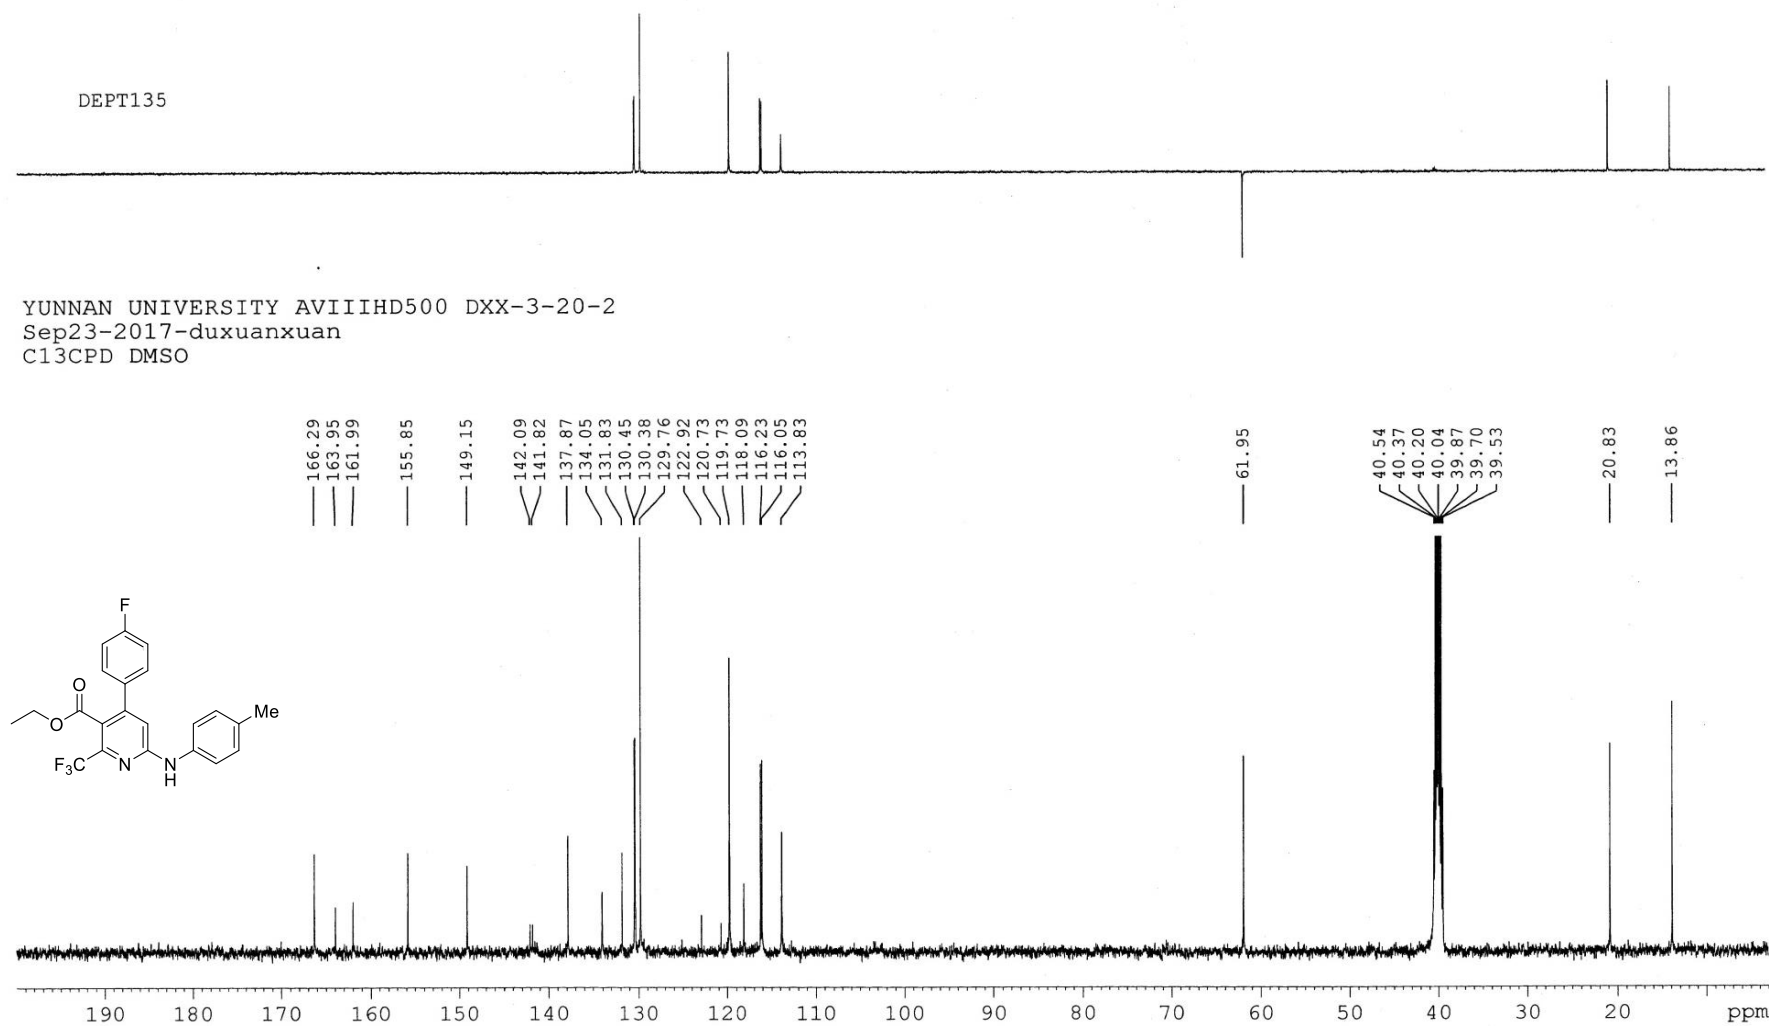

Figure S41.  $^{13}\text{C}$  NMR (125 MHz,  $\text{DMSO-}d_6$ ) spectra of compound **5b**

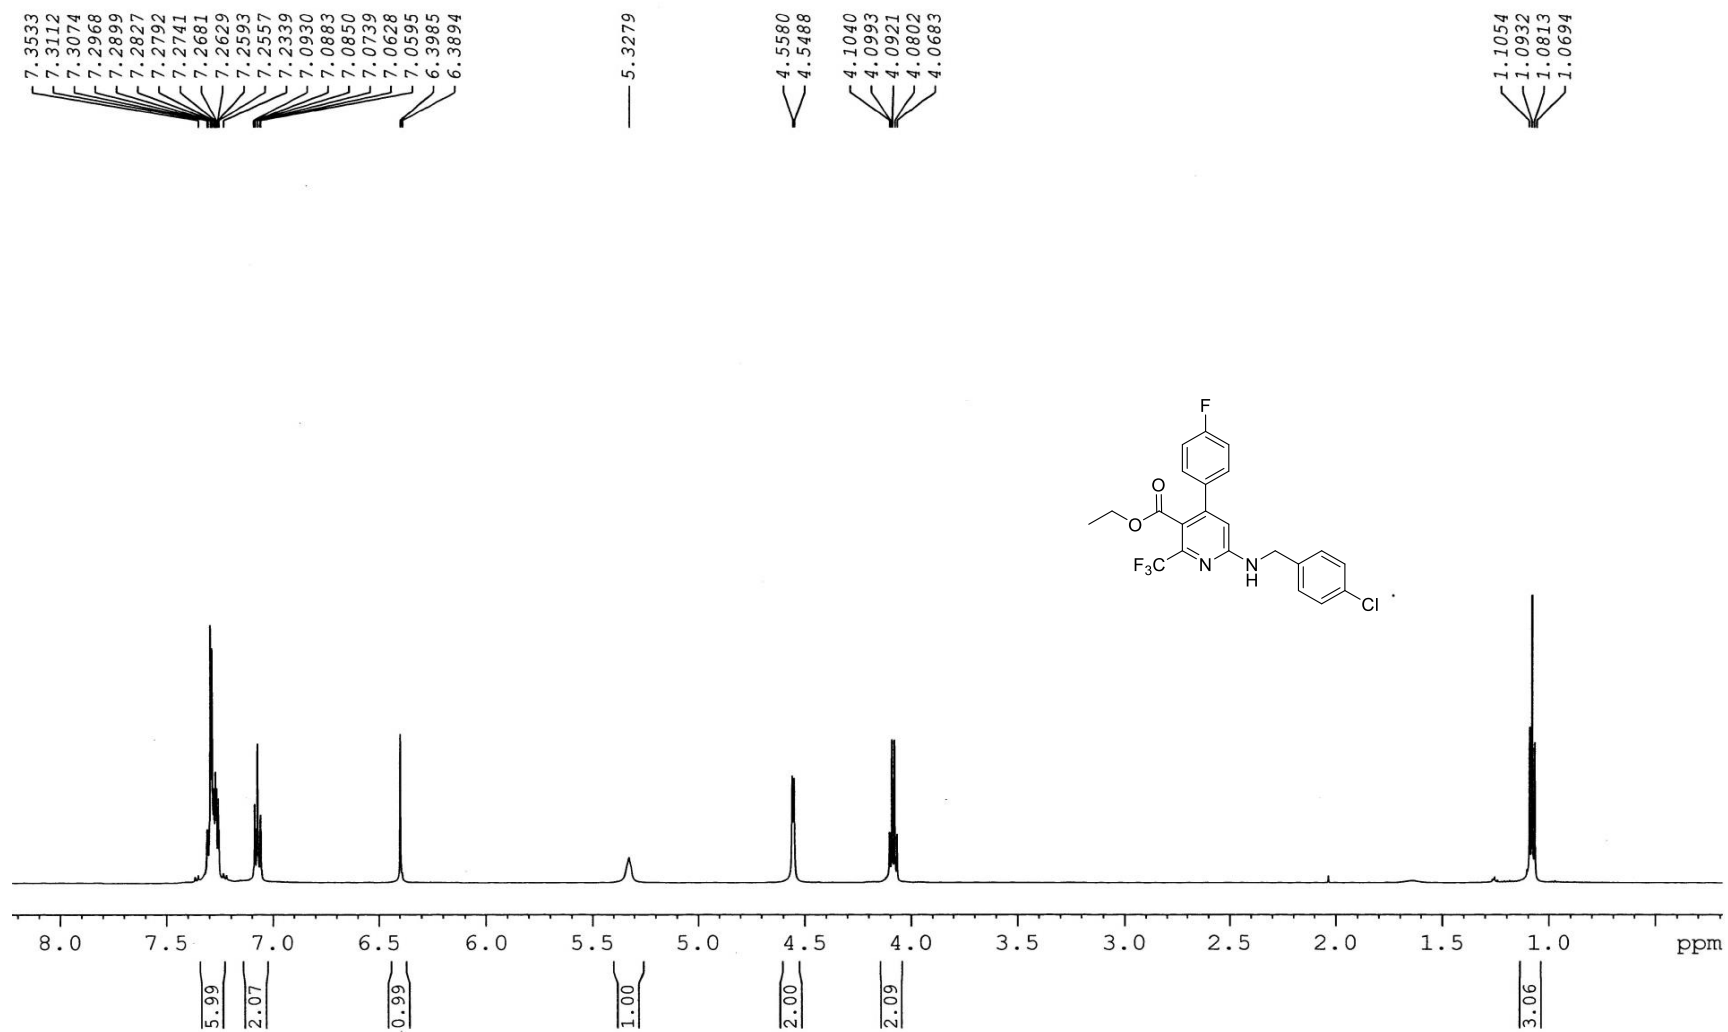

Figure S42. <sup>1</sup>H NMR (600 MHz, CDCl<sub>3</sub>) spectra of compound 5c

DEPT135

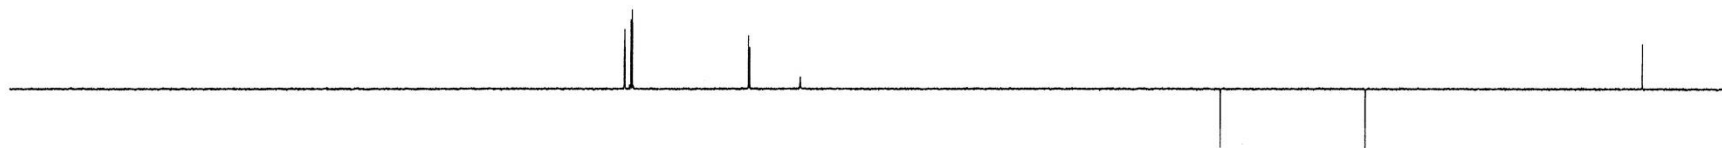

YUNNAN UNIVERSITY ASCEND AVIIIHD600 DXX-3-8-2  
Sep06-2017-duxuanxuan  
C13CPD CDC13

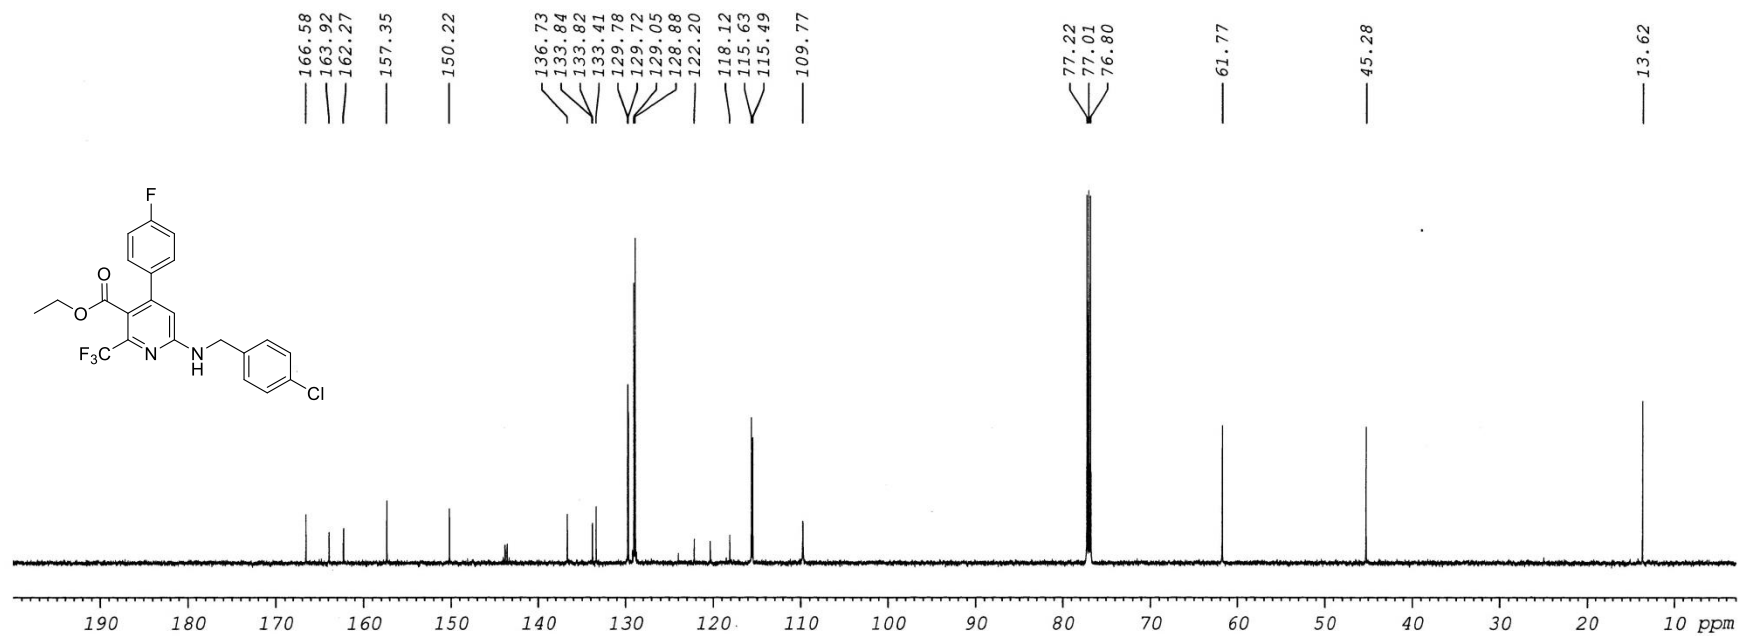

Figure S43.  $^{13}\text{C}$  NMR (150 MHz,  $\text{CDCl}_3$ ) spectra of compound 5c

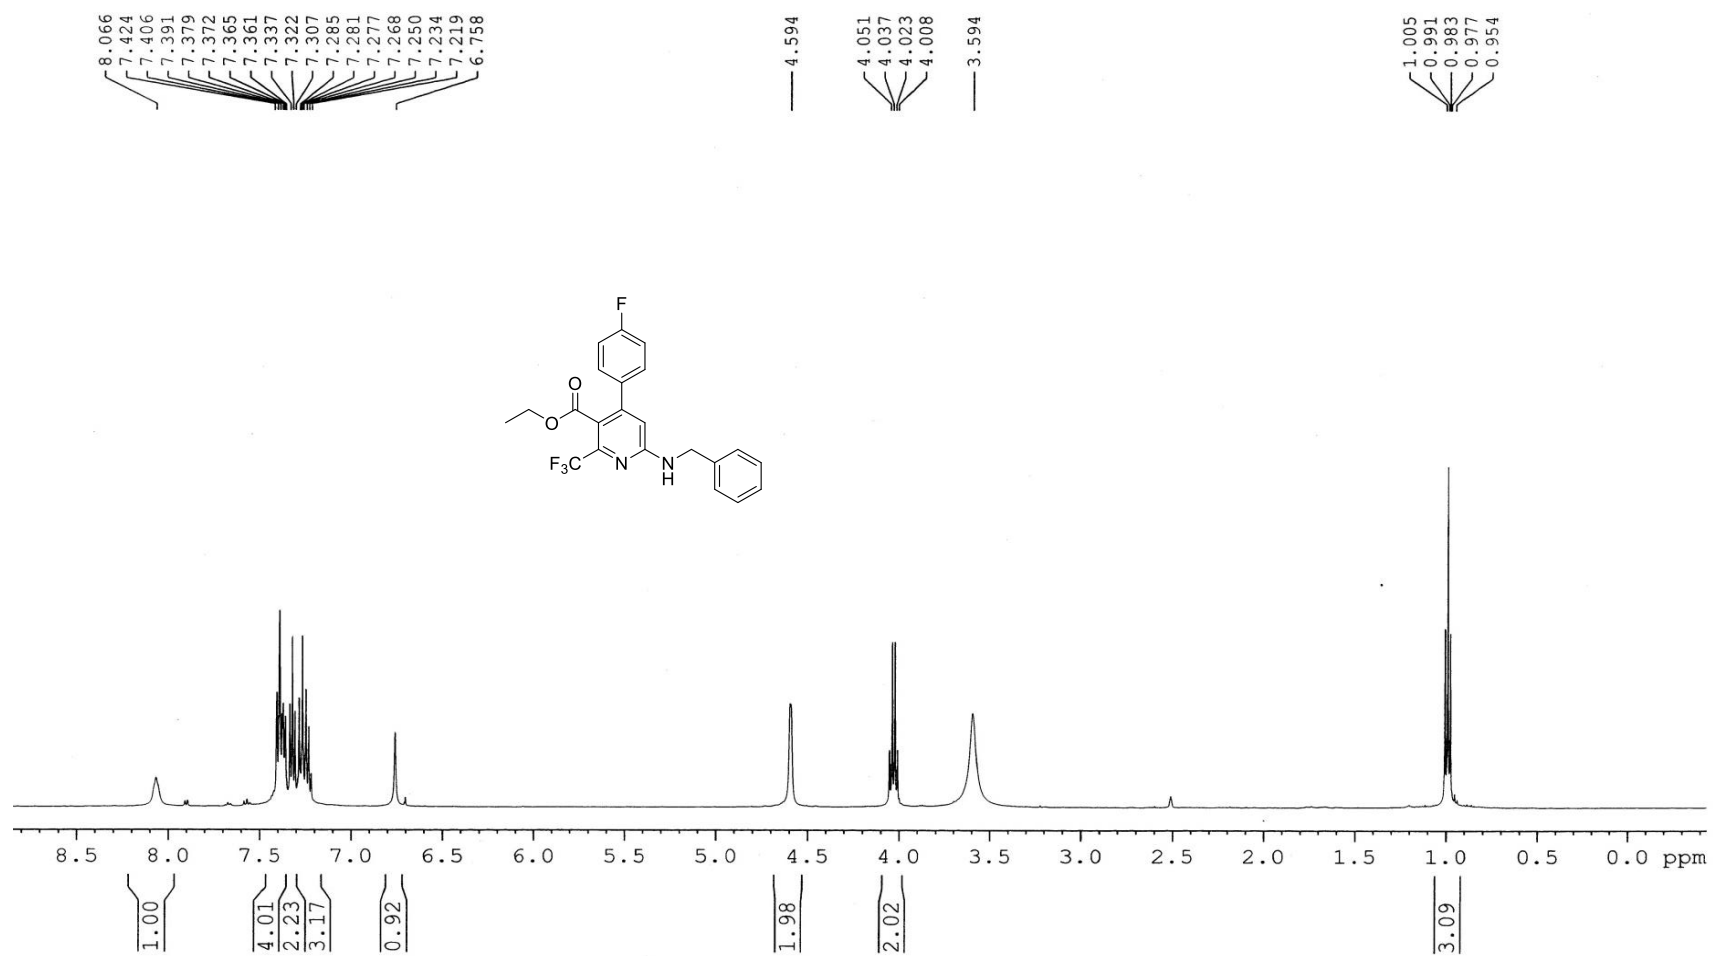

**Figure S44.** <sup>1</sup>H NMR (500 MHz, DMSO-*d*<sub>6</sub>) spectra of compound **5d**

DEPT135

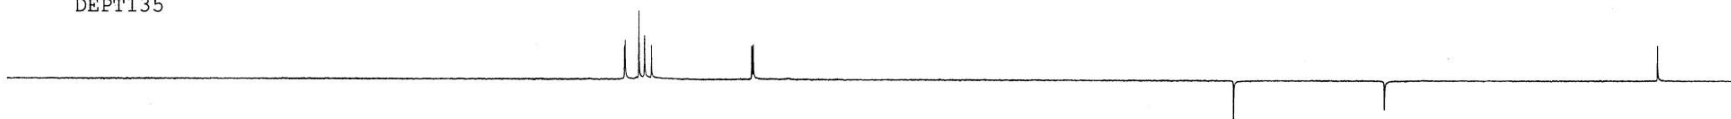

YUNNAN UNIVERSITY AVIIIHD500 DXX-3-11-2  
Jun27-2017-duxuanxuan  
C13CPD DMSO

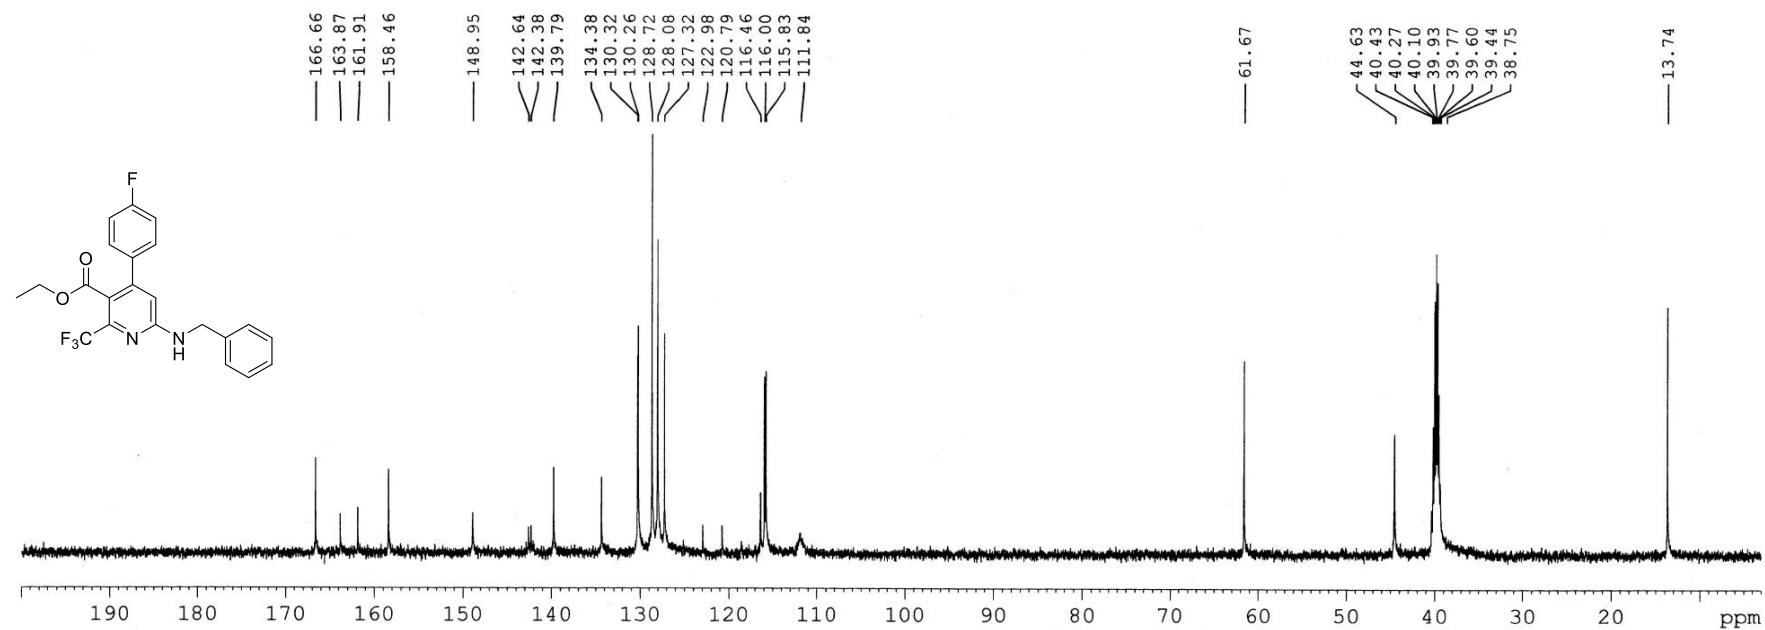

Figure S45. <sup>13</sup>C NMR (125MHz, DMSO-*d*<sub>6</sub>) spectra of compound 5d



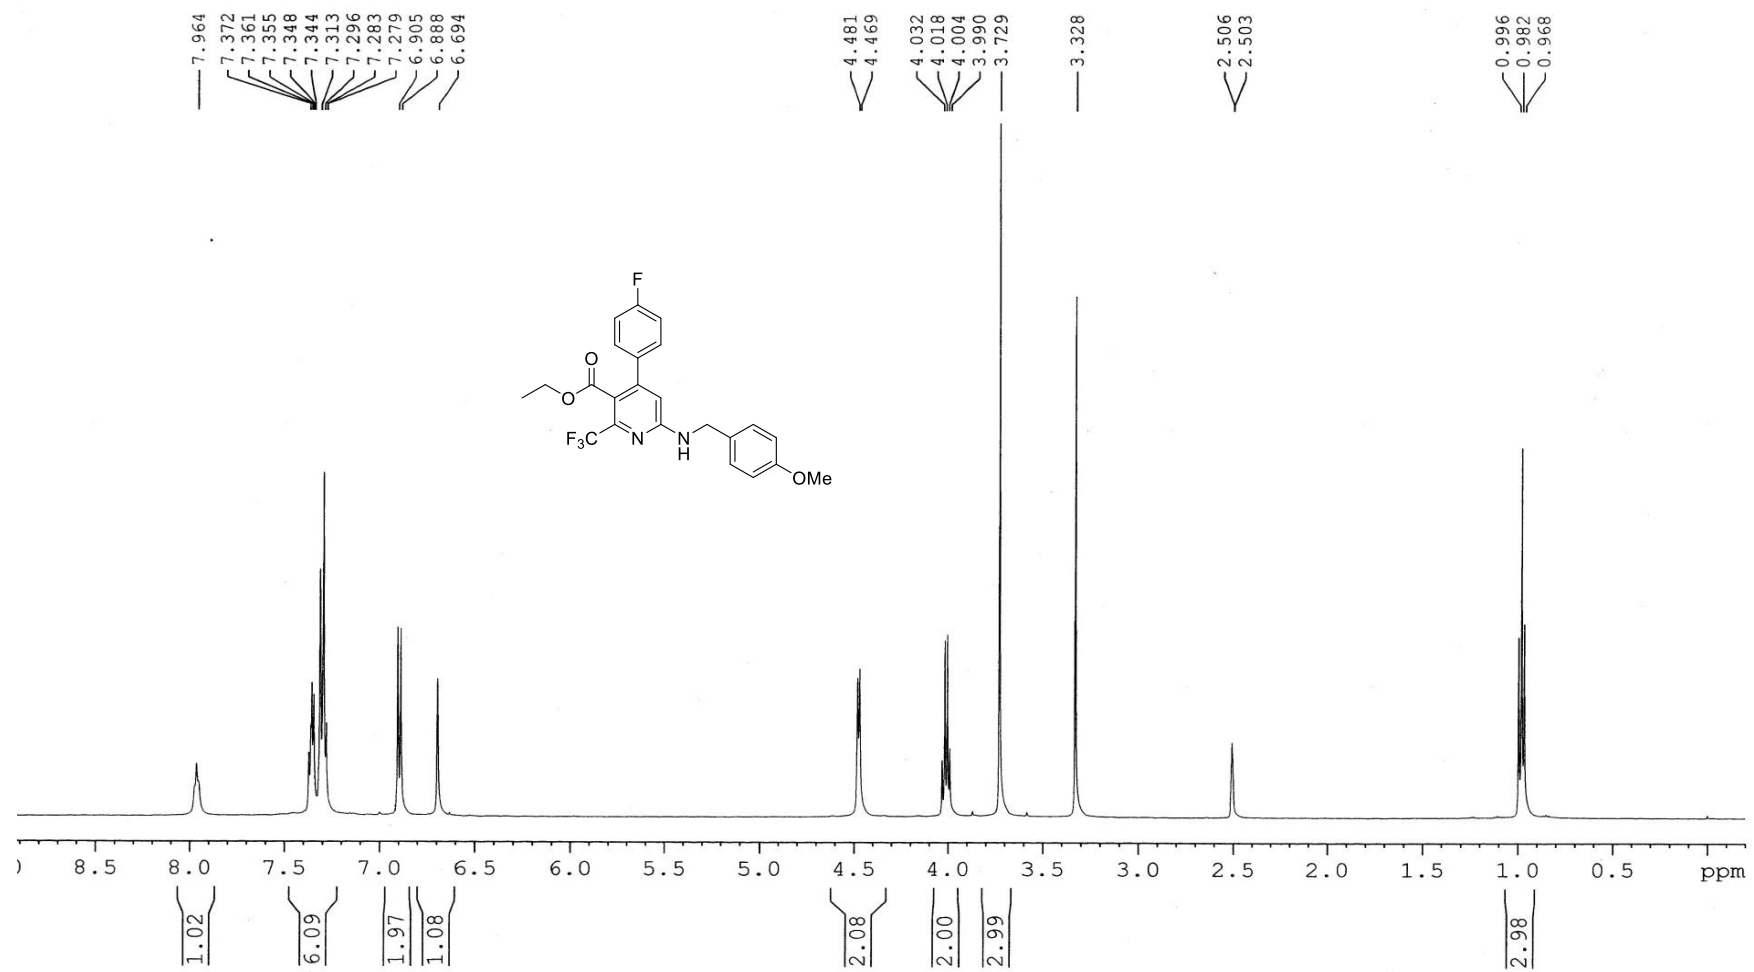

**Figure S46.** <sup>1</sup>H NMR (500 MHz, DMSO-*d*<sub>6</sub>) spectra of compound **5e**

DEPT135

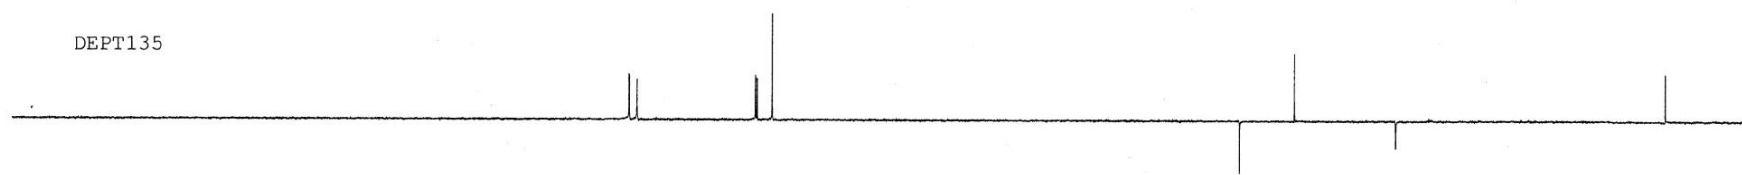

YUNNAN UNIVERSITY AVIIHD500 DXX-3-18-2  
Sep23-2017-duxuanxuan  
C13CPD DMSO

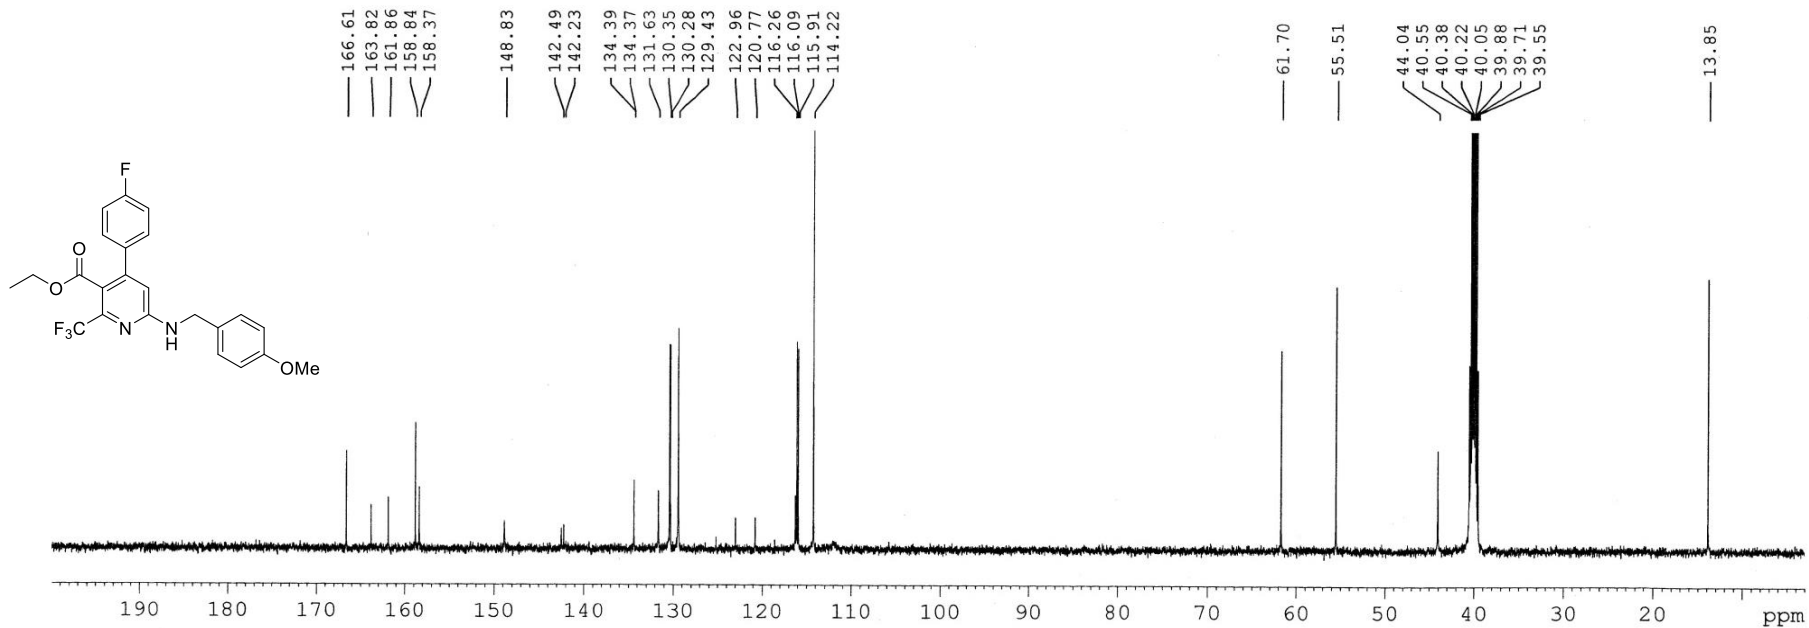

Figure S47. <sup>13</sup>C NMR (125 MHz, DMSO-*d*<sub>6</sub>) spectra of compound 5e

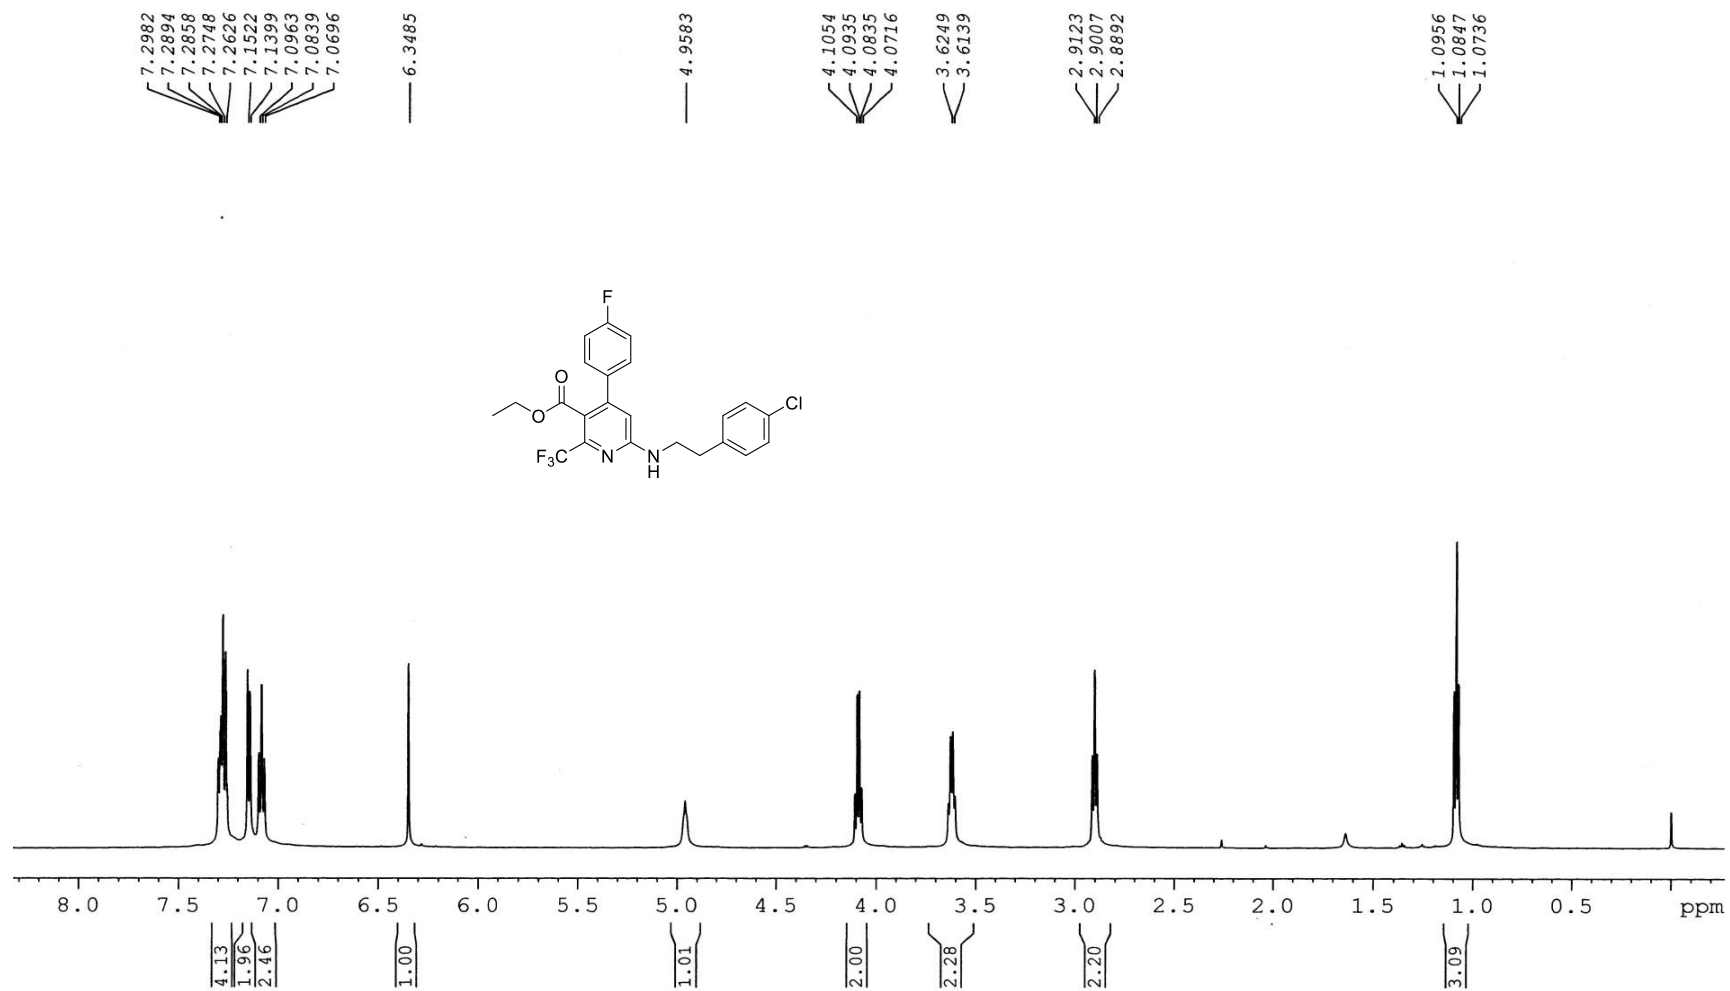

**Figure S48.** <sup>1</sup>H NMR (600 MHz, CDCl<sub>3</sub>) spectra of compound **5f**

DEPT135

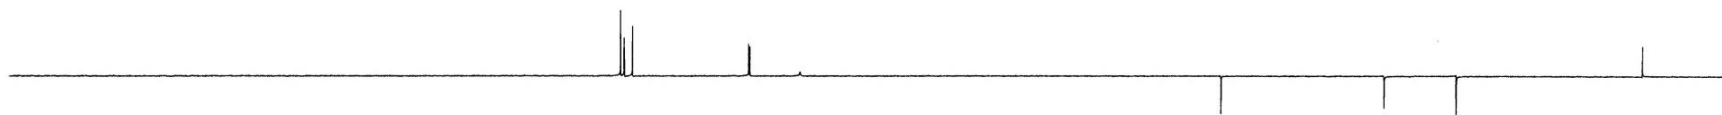

YUNNAN UNIVERSITY ASCEND AVIIIHD600 DXX -3-5-2  
Sep07-2017-duxuanxuan  
C13CPD CDCl3

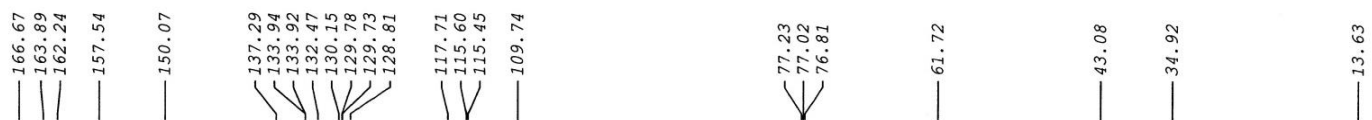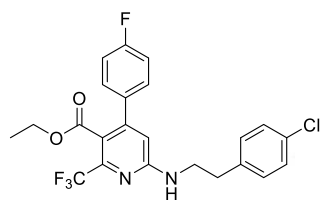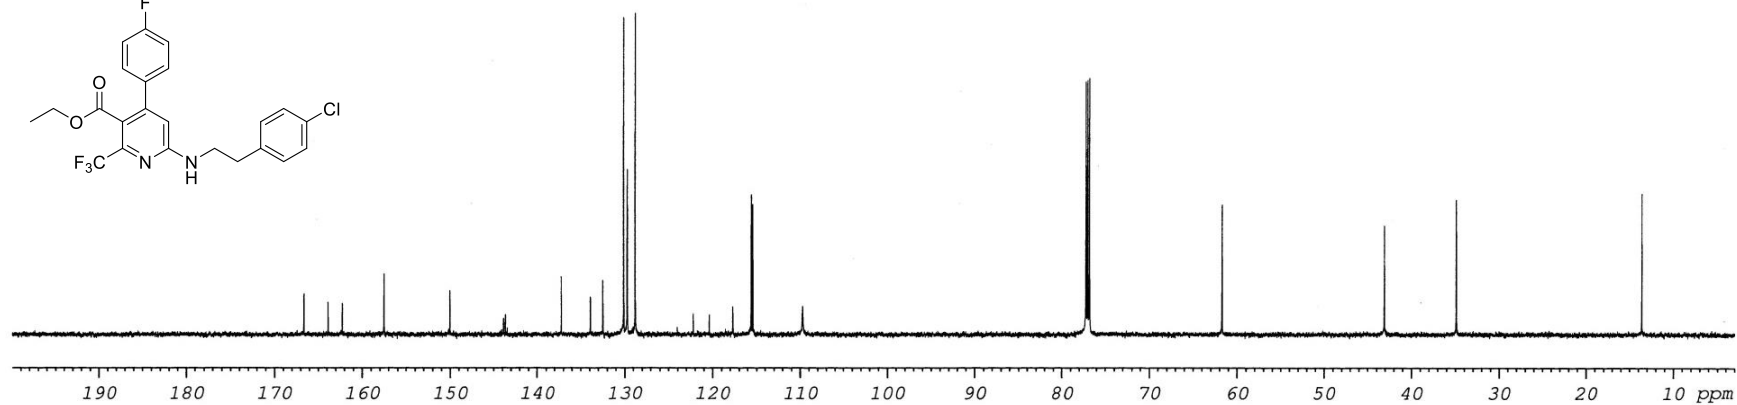

Figure S49.  $^{13}\text{C}$  NMR (150 MHz,  $\text{CDCl}_3$ ) spectra of compound **5f**

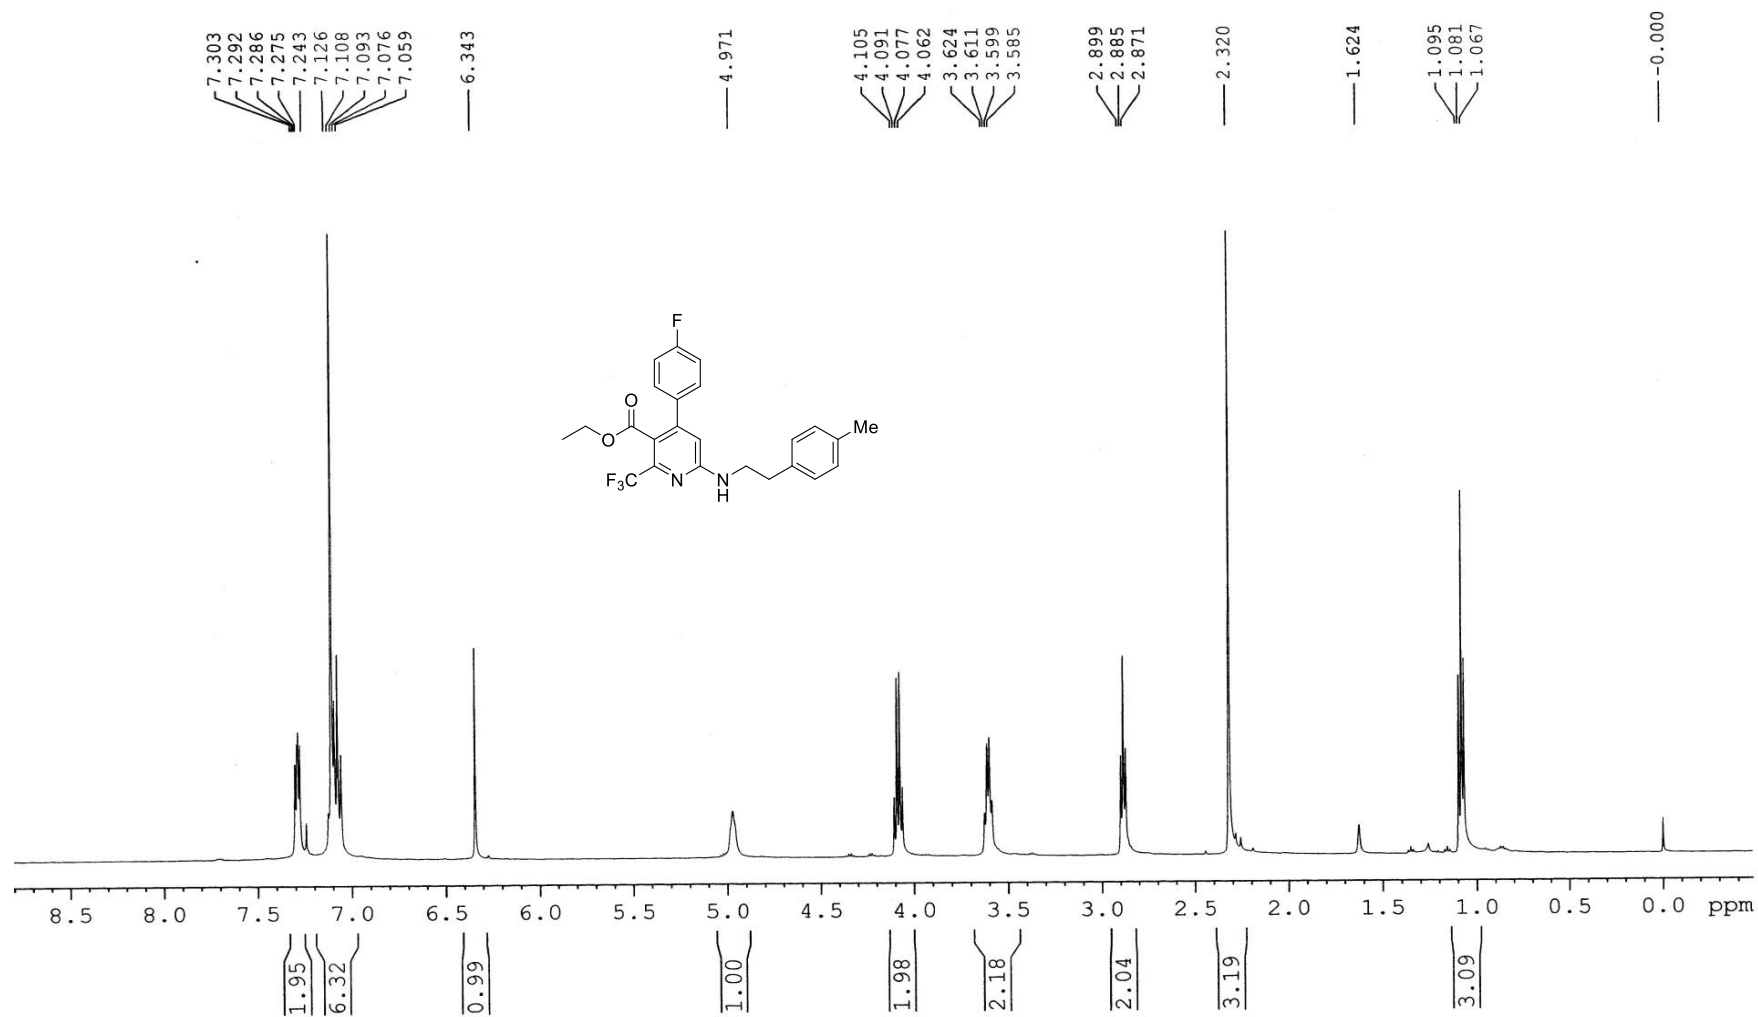

**Figure S50.**  $^1\text{H}$  NMR (500 MHz,  $\text{CDCl}_3$ ) spectra of compound **5g**

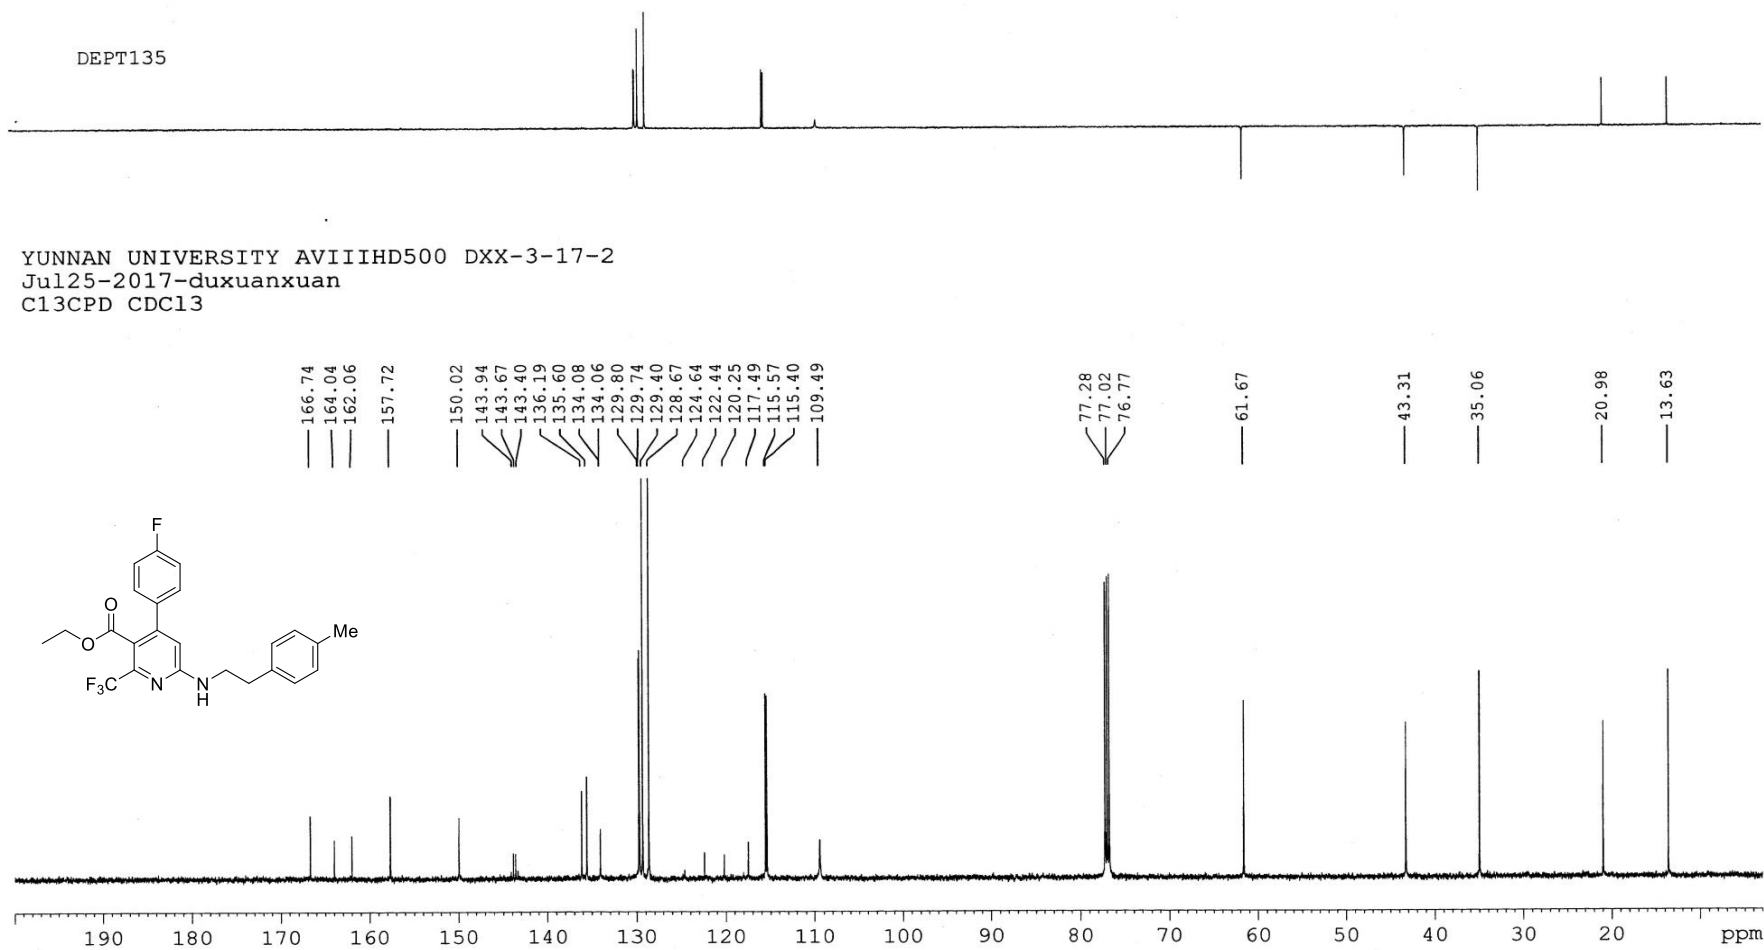

Figure S51.  $^{13}\text{C}$  NMR (125 MHz,  $\text{CDCl}_3$ ) spectra of compound **5g**

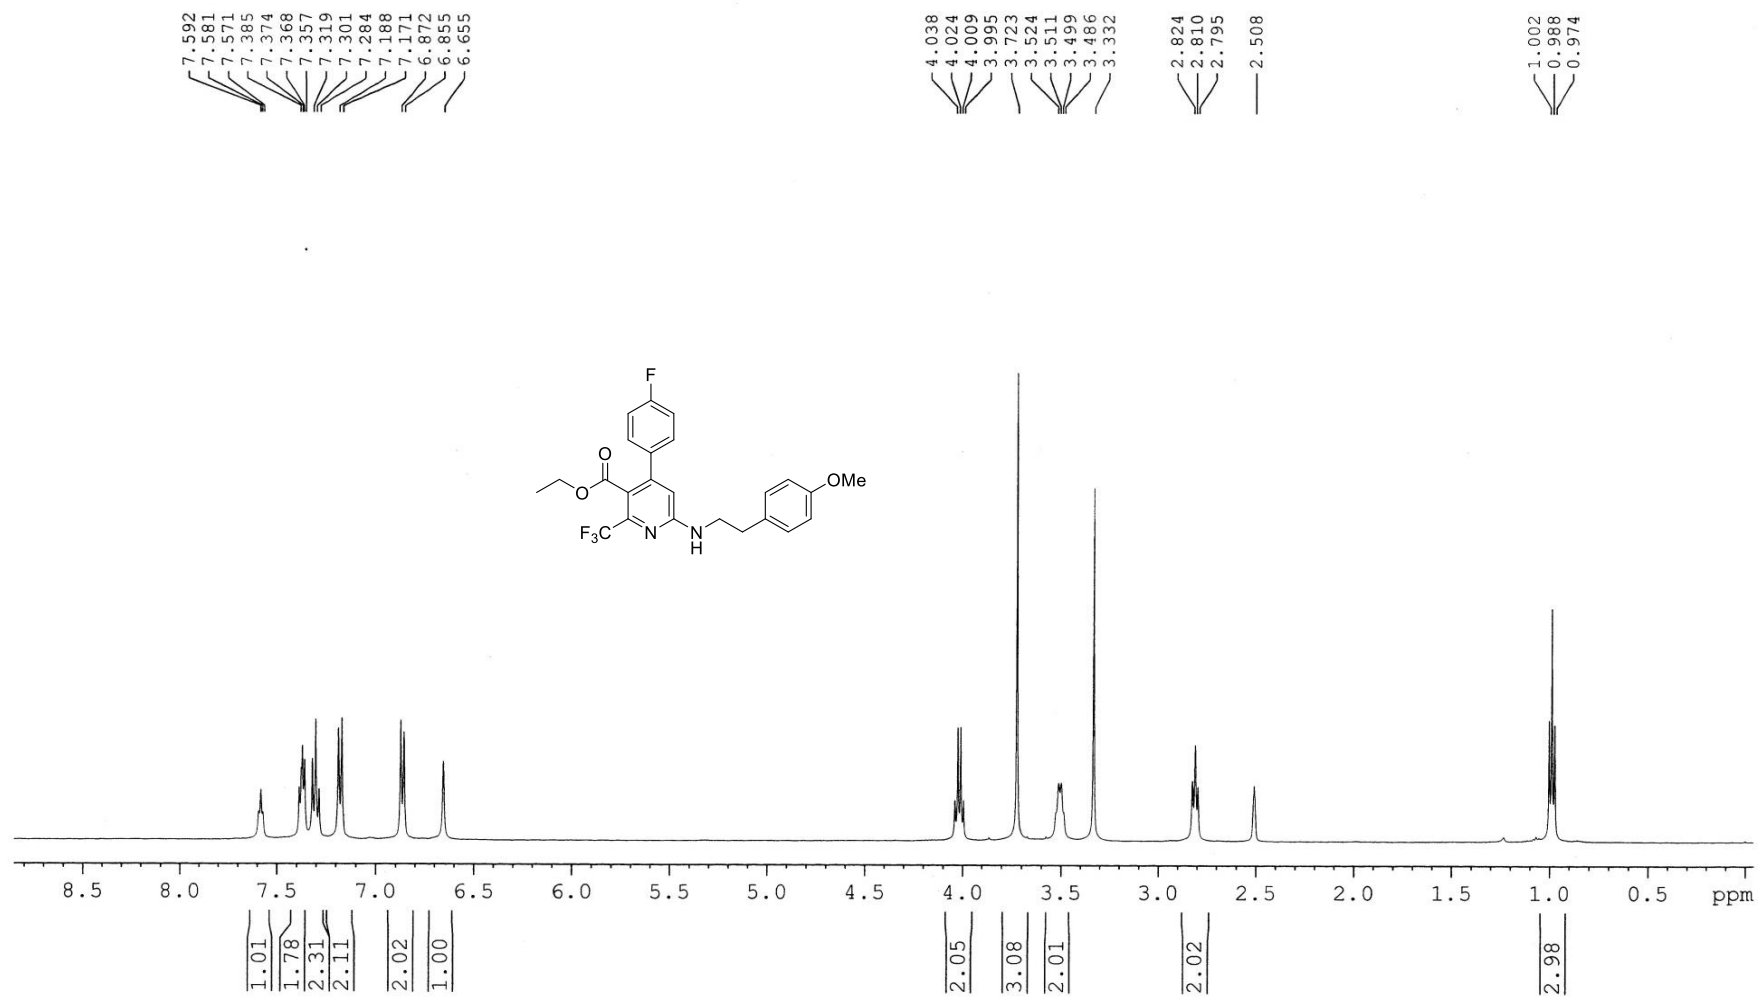

**Figure S52.** <sup>1</sup>H NMR (500 MHz, DMSO-*d*<sub>6</sub>) spectra of compound **5h**

DEPT135

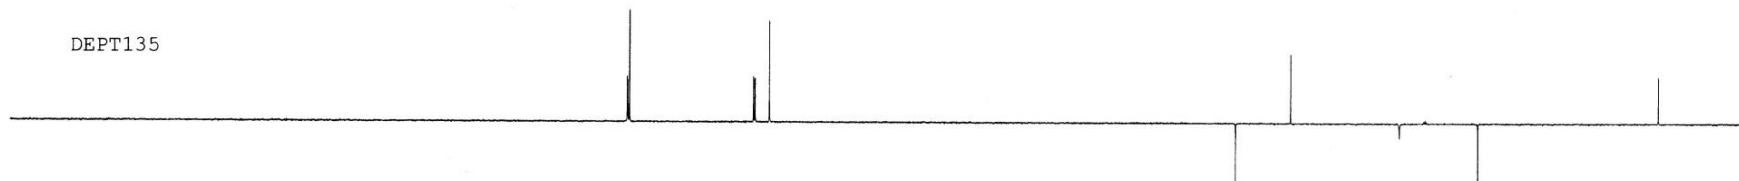

YUNNAN UNIVERSITY AVIIIHD500 DXX-3-12-2  
Sep30-2017-duxuanxuan  
C13CPD DMSO

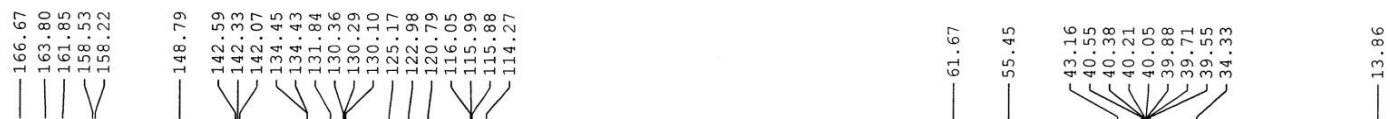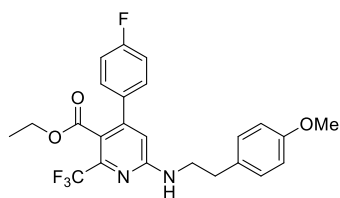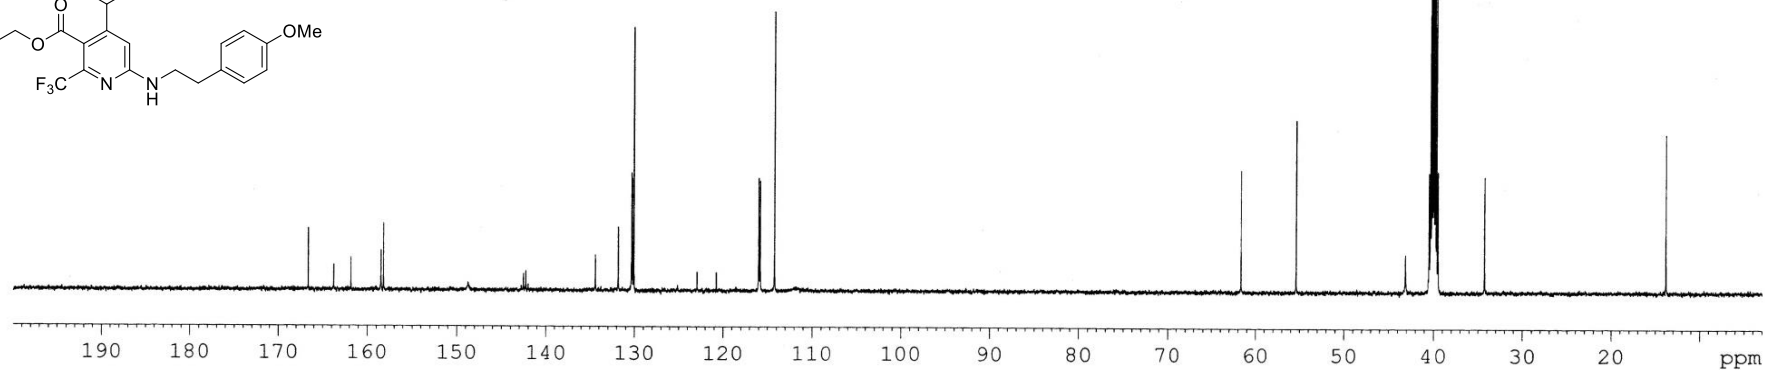

Figure S53. <sup>13</sup>C NMR (125 MHz, DMSO-*d*<sub>6</sub>) spectra of compound 5h



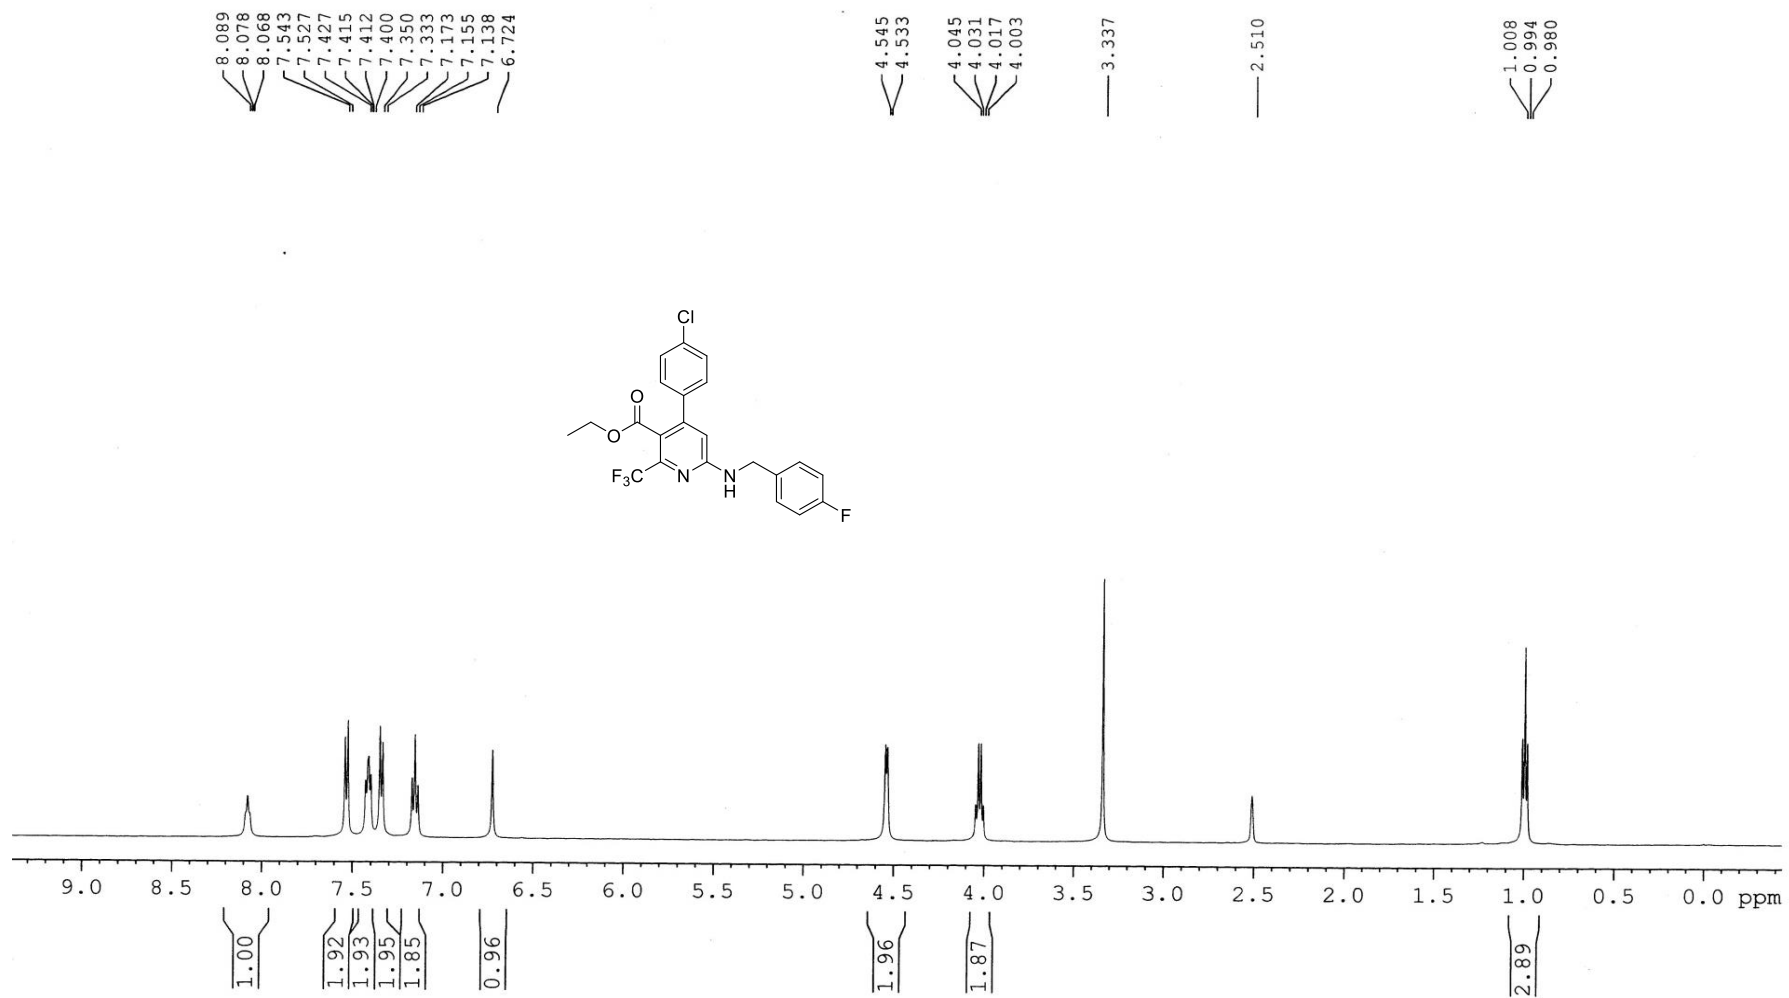

**Figure S54.** <sup>1</sup>H NMR (500 MHz, DMSO-*d*<sub>6</sub>) spectra of compound **5i**

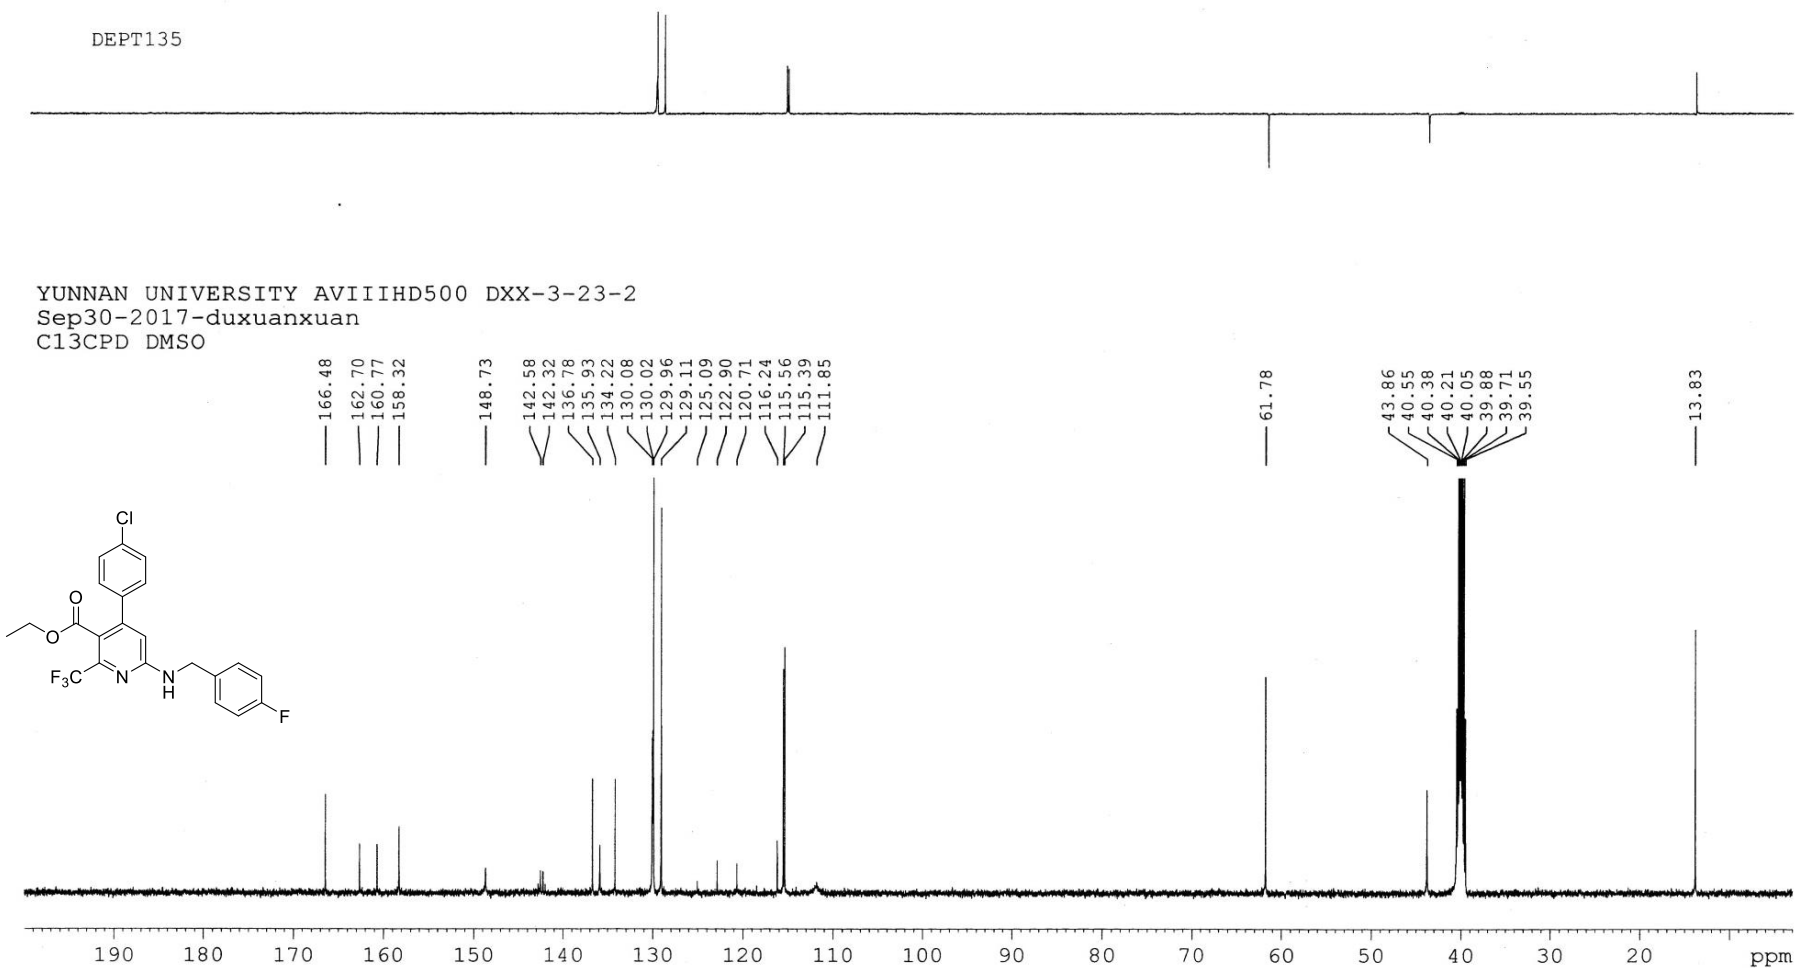

Figure S55.  $^{13}\text{C}$  NMR (125 MHz,  $\text{DMSO-}d_6$ ) spectra of compound **5i**

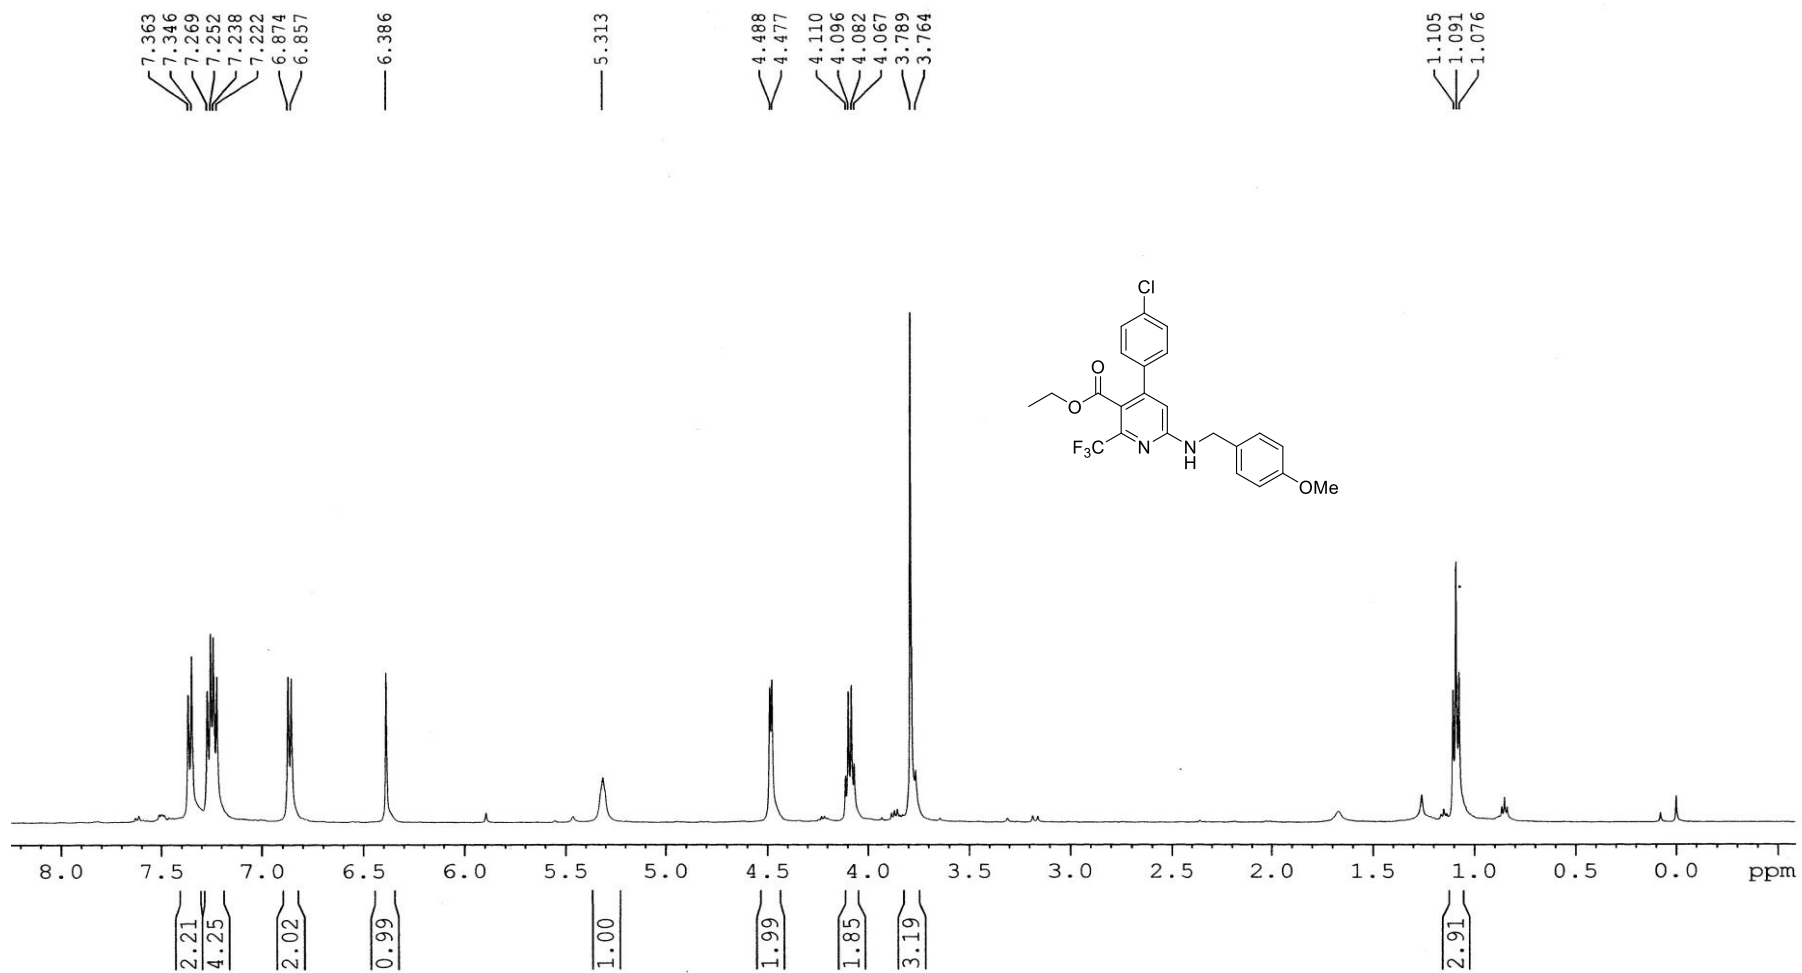

**Figure S56.** <sup>1</sup>H NMR (500 MHz, CDCl<sub>3</sub>) spectra of compound **5j**

DEPT135

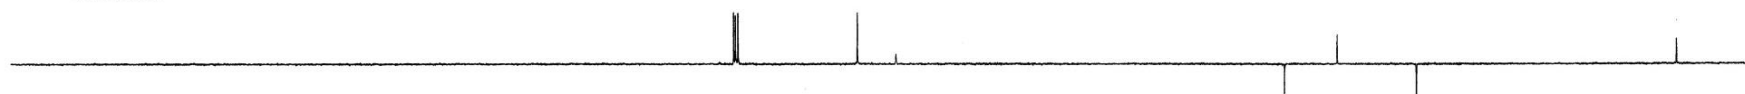

YUNNAN UNIVERSITY AVIIHD500 DXX-3-33-2  
Sep13-2017-duxuanxuan  
C13CPD CDC13

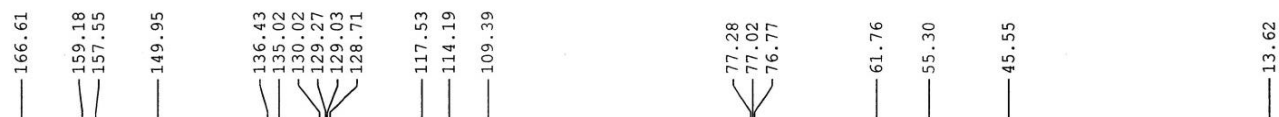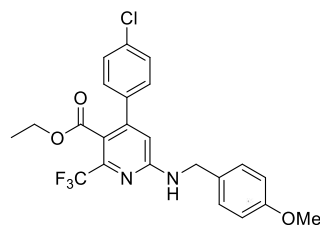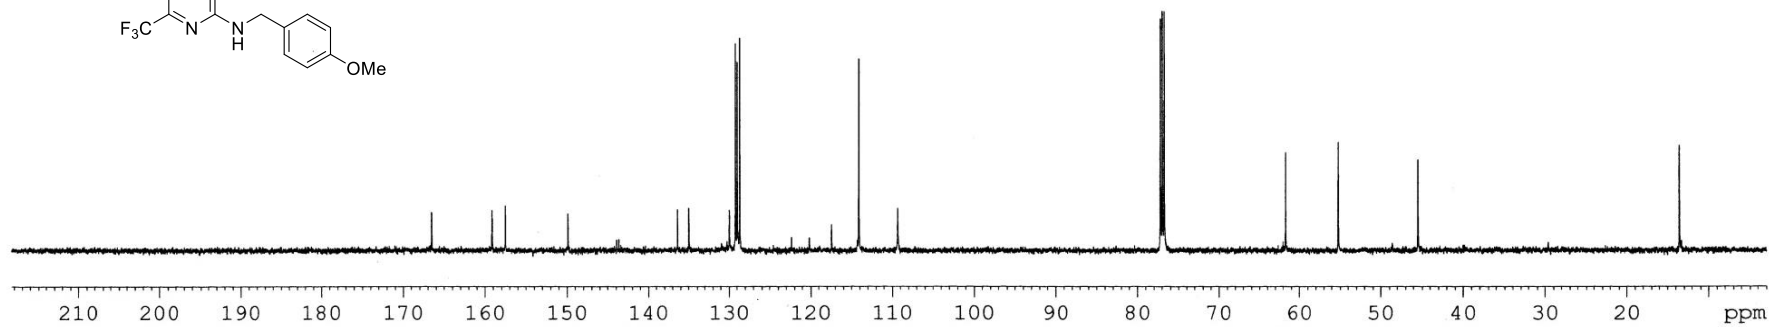

Figure S57. <sup>13</sup>C NMR (125 MHz, CDCl<sub>3</sub>) spectra of compound 5j

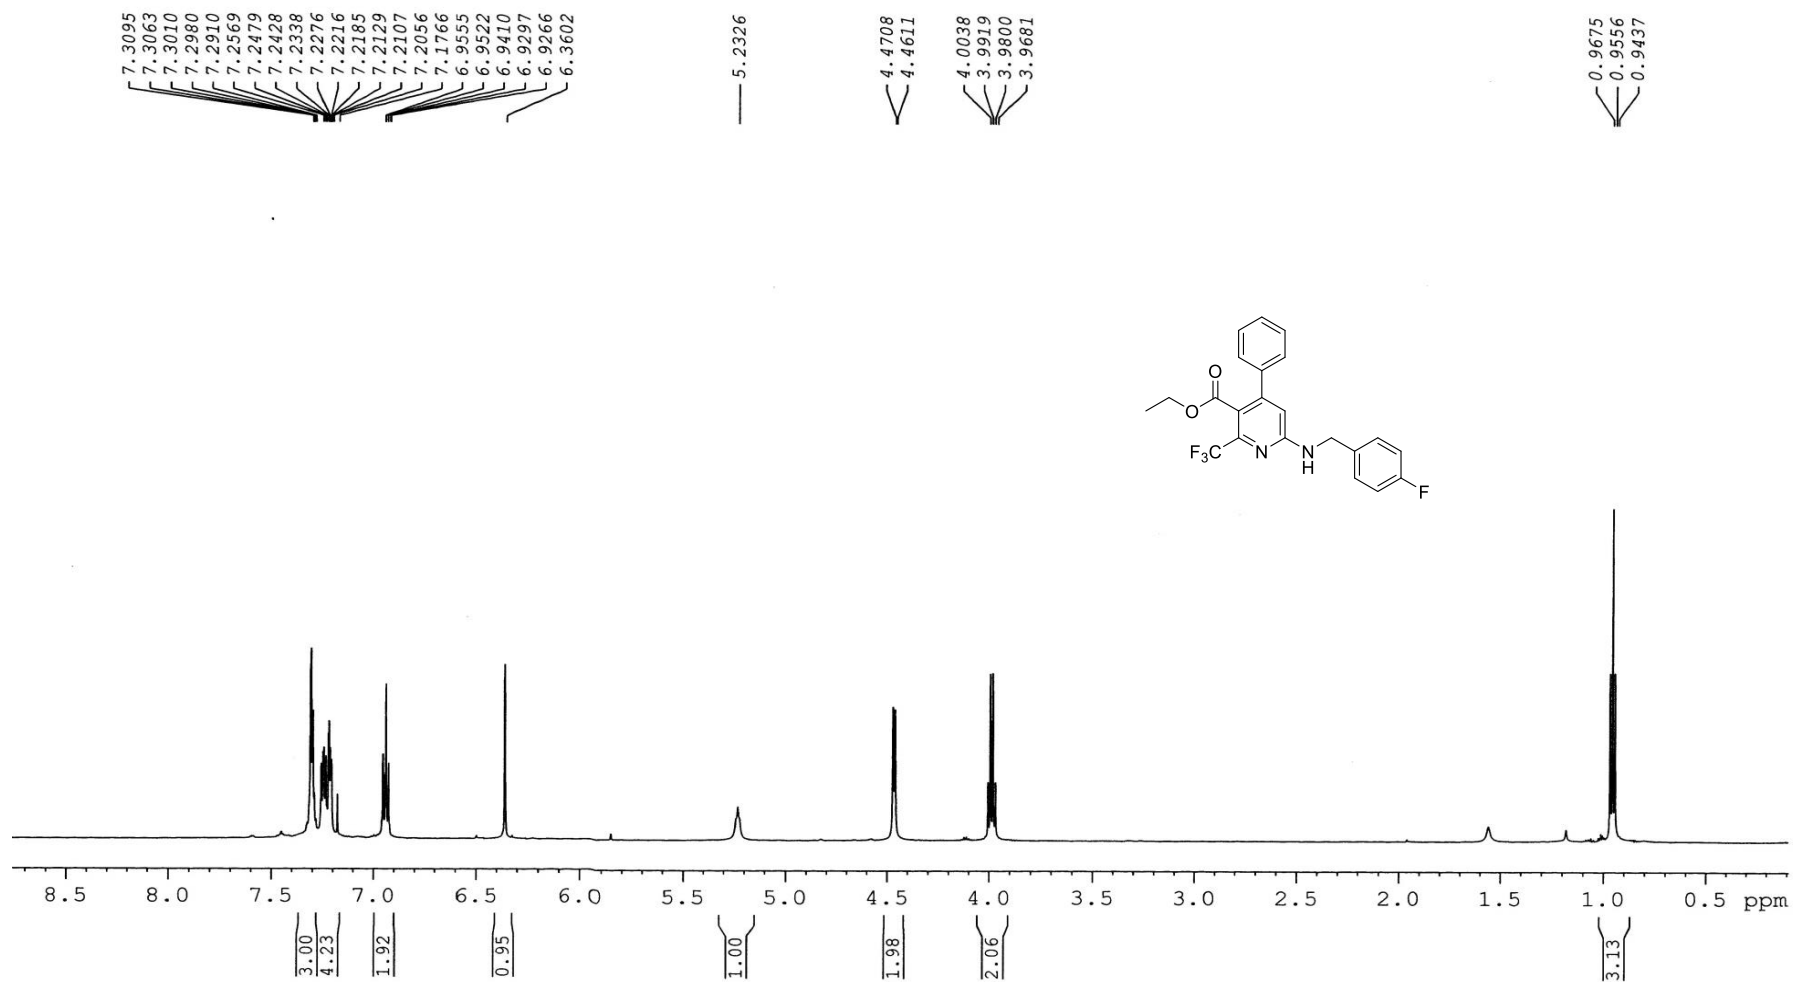

**Figure S58.** <sup>1</sup>H NMR (600 MHz, CDCl<sub>3</sub>) spectra of compound **5k**

DEPT135

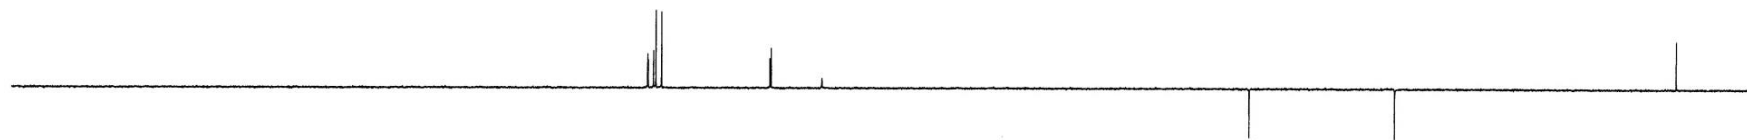

YUNNAN UNIVERSITY ASCEND AVIIIHD600 DXX-3-22-2  
Sep06-2017-duxuanxuan  
C13CPD CDC13

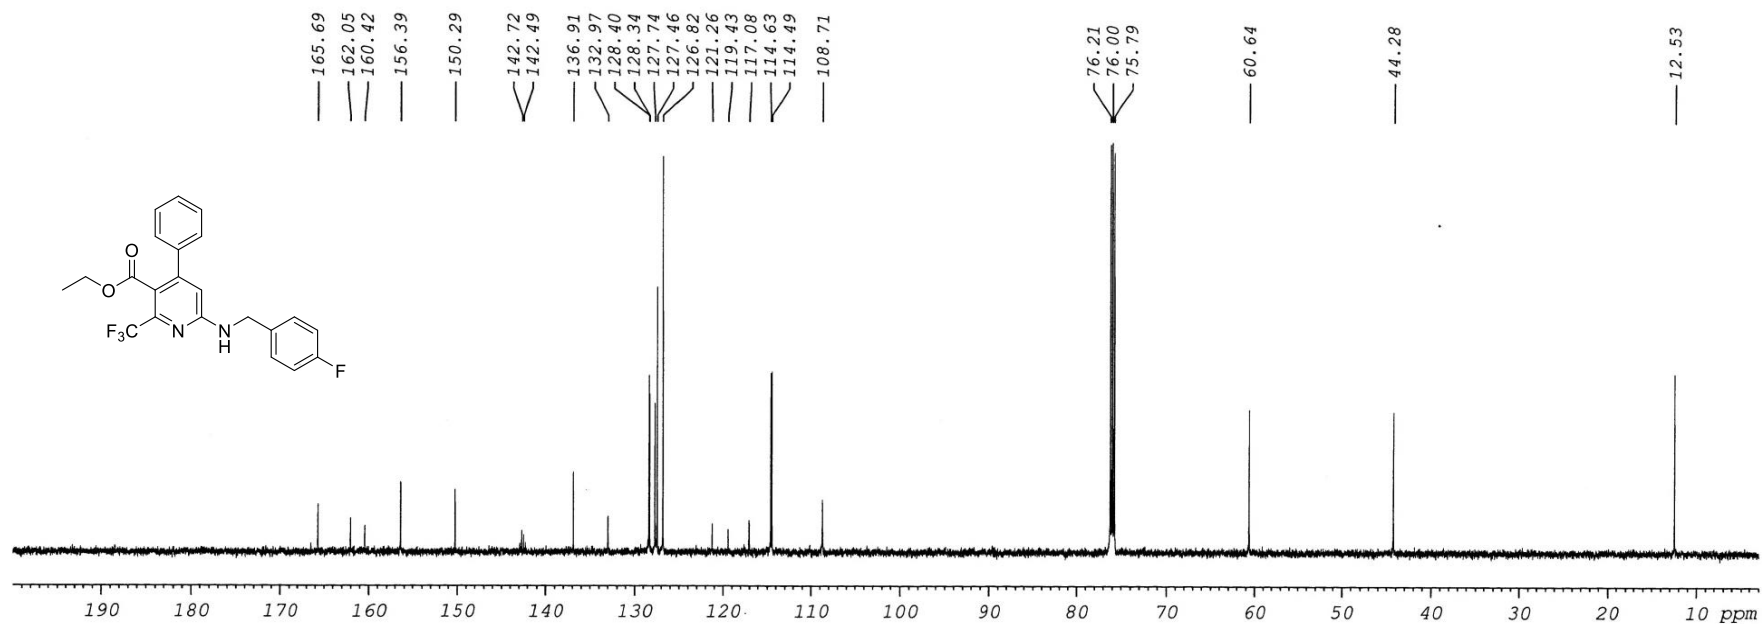

Figure S59. <sup>13</sup>C NMR (150 MHz, CDCl<sub>3</sub>) spectra of compound 5k

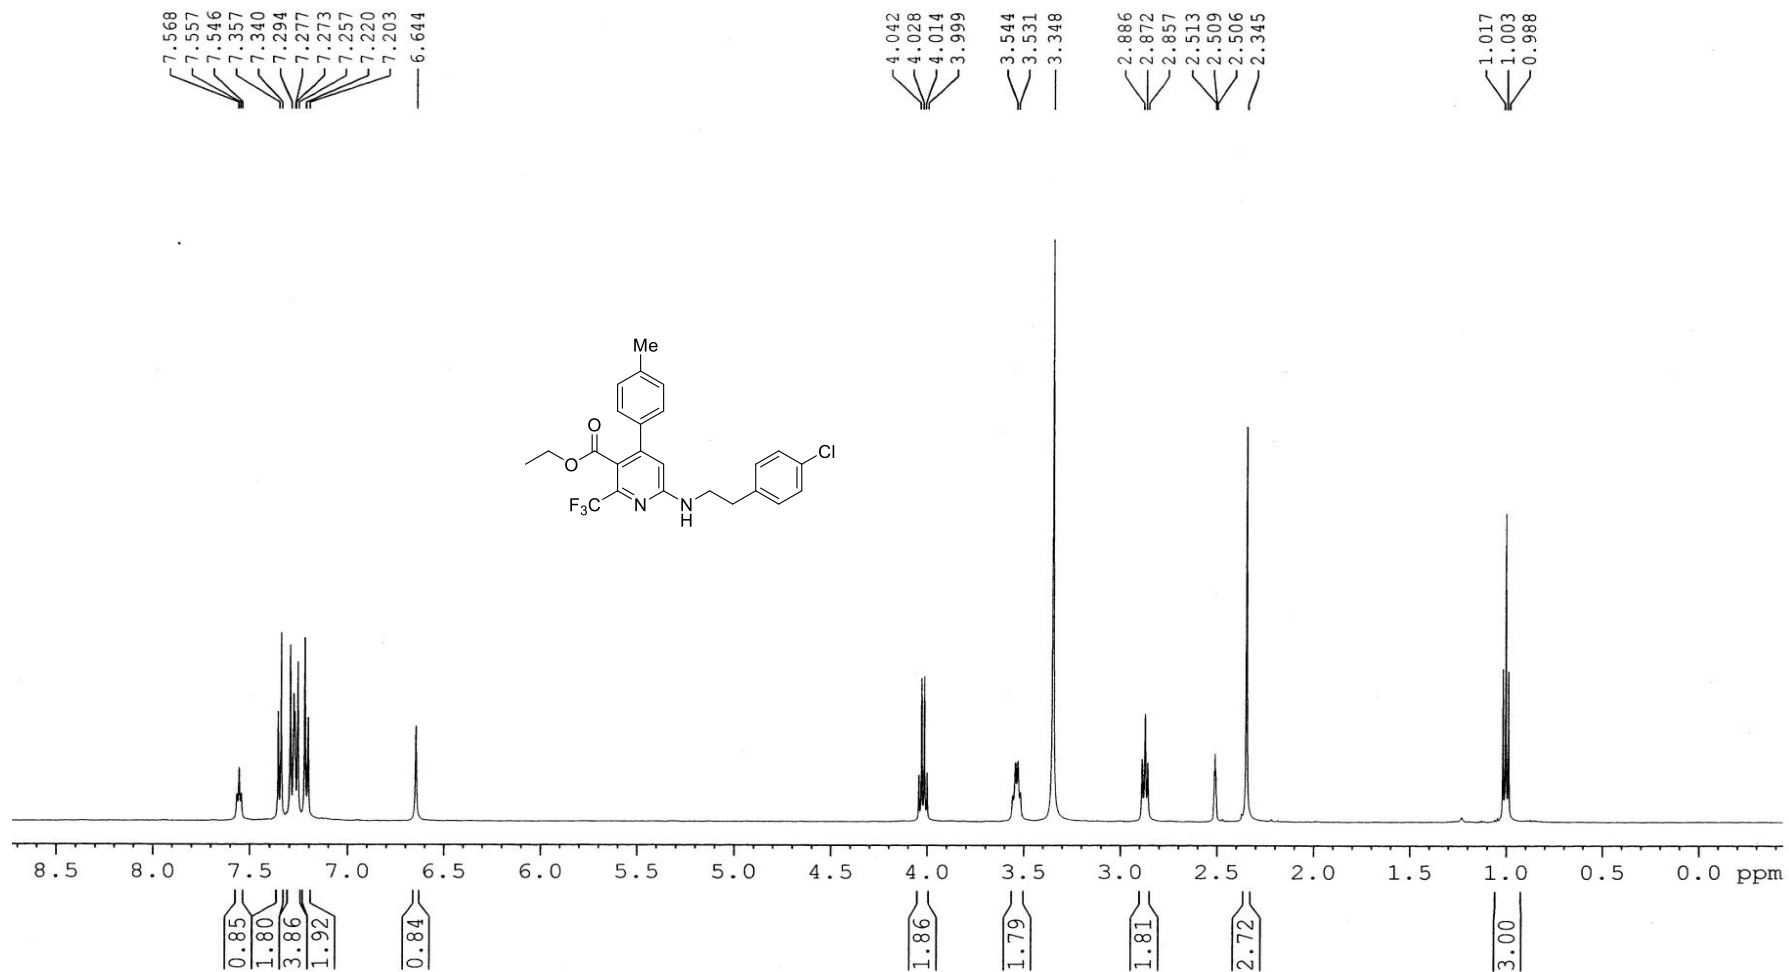

**Figure S60.**  $^1\text{H}$  NMR (500 MHz,  $\text{DMSO-}d_6$ ) spectra of compound **5I**

DEPT135

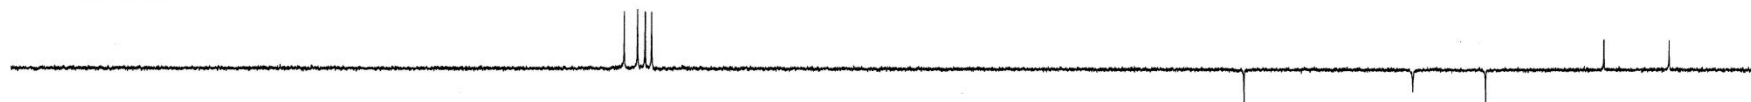

YUNNAN UNIVERSITY AVIIIHD500 DXX-3-7-2  
Jun27-2017-duxuanxuan  
C13CPD DMSO

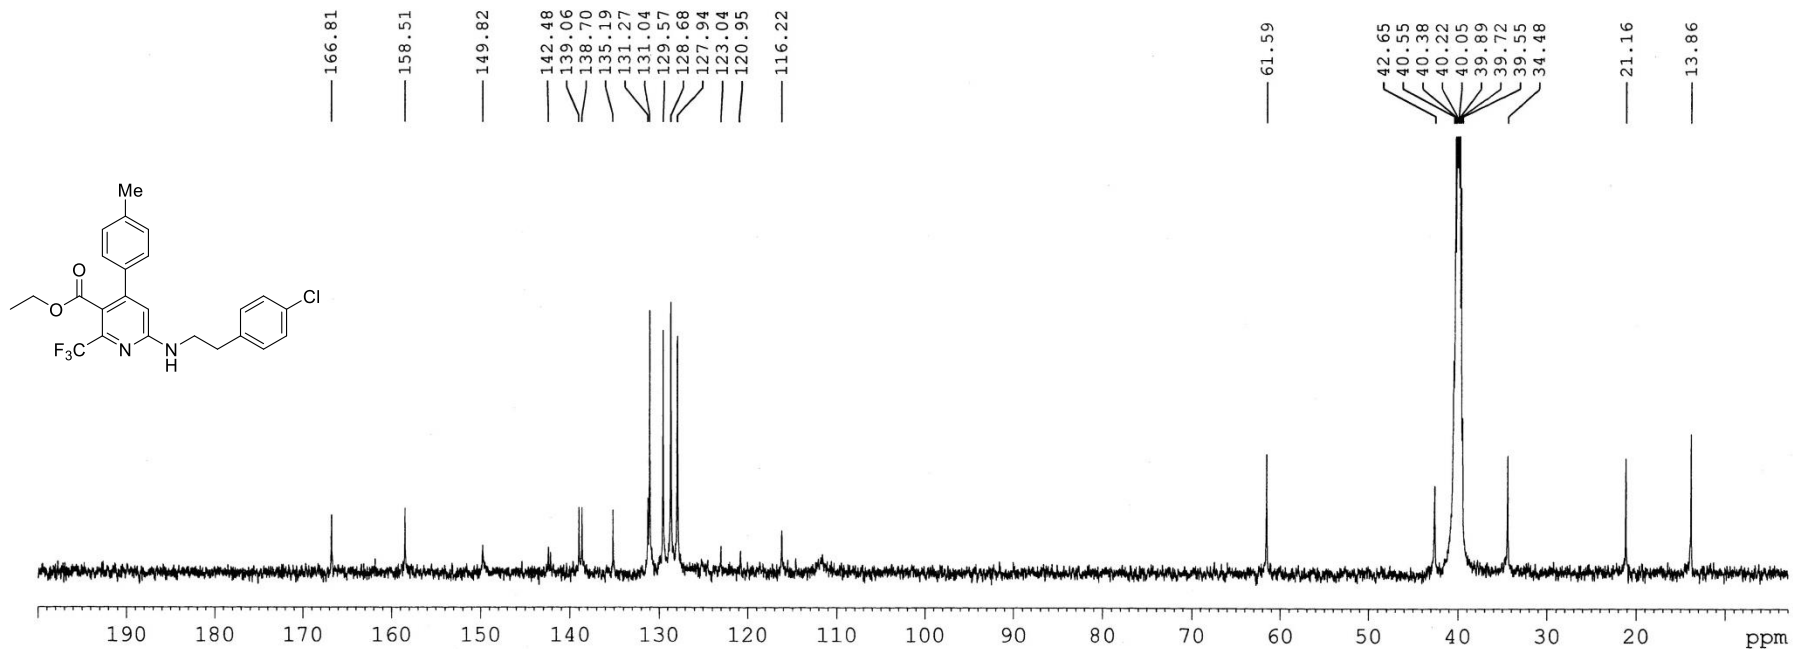

Figure S61.  $^{13}\text{C}$  NMR (125 MHz,  $\text{DMSO-}d_6$ ) spectra of compound **51**



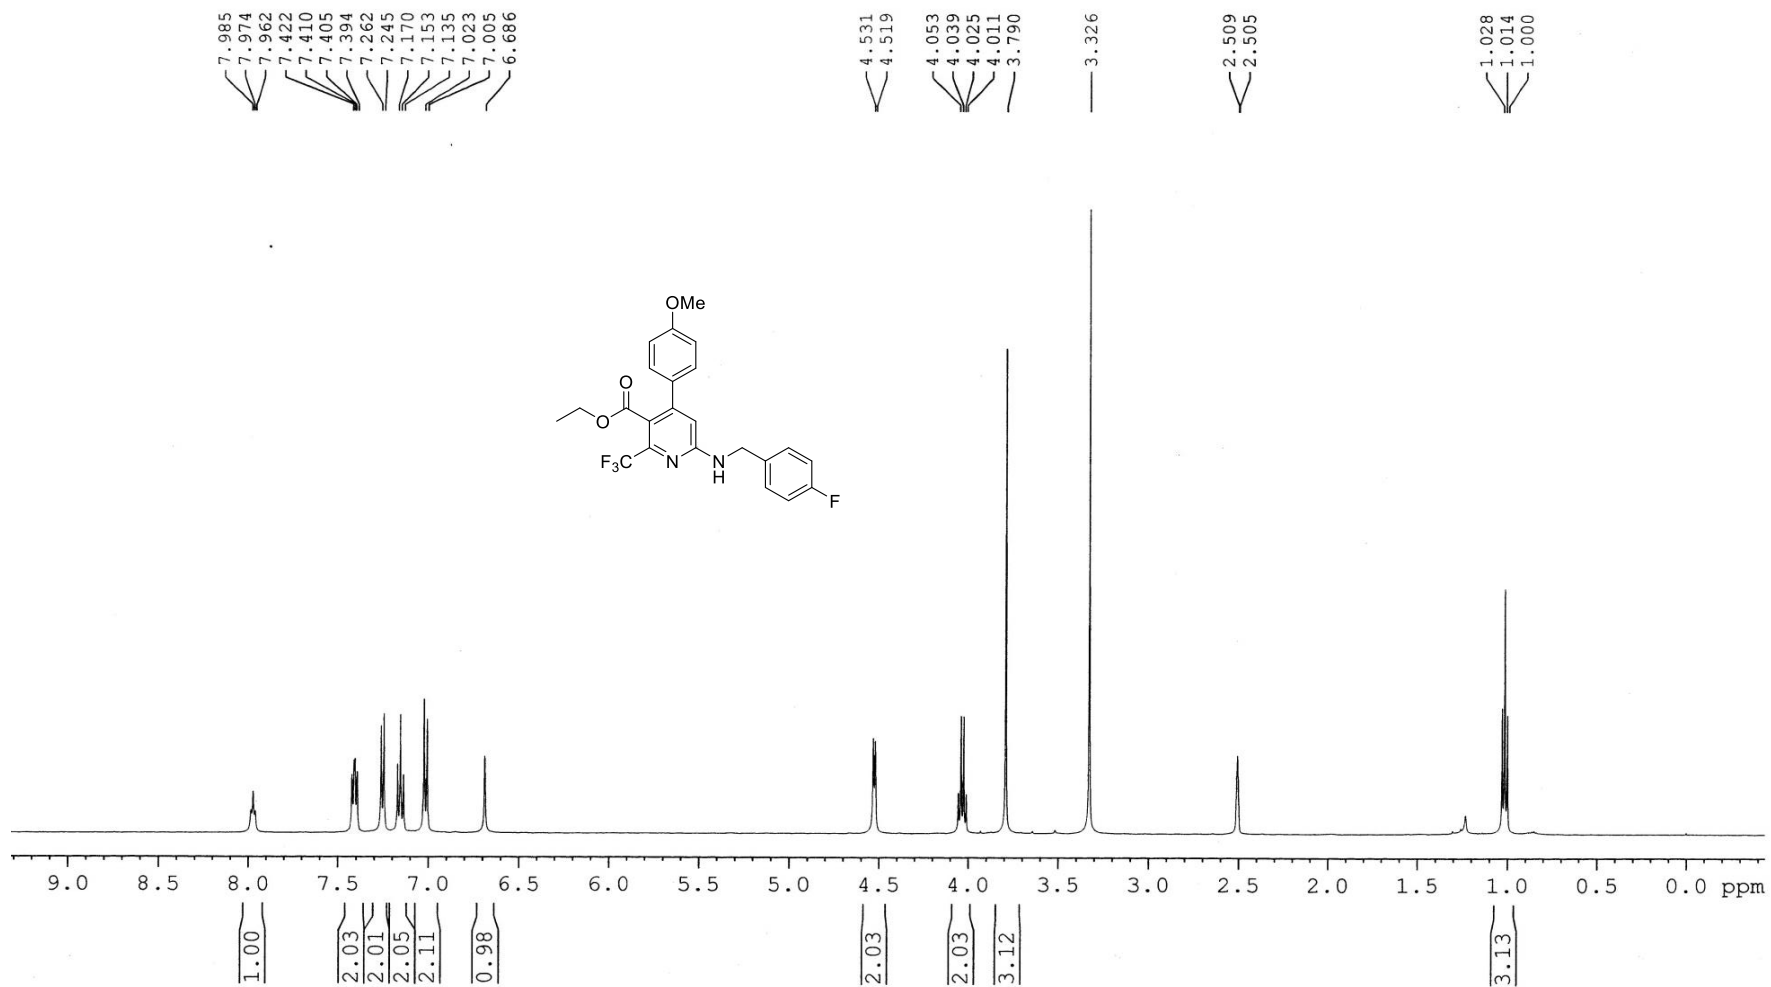

**Figure S62.** <sup>1</sup>H NMR (500 MHz, DMSO-*d*<sub>6</sub>) spectra of compound **5m**

DEPT135

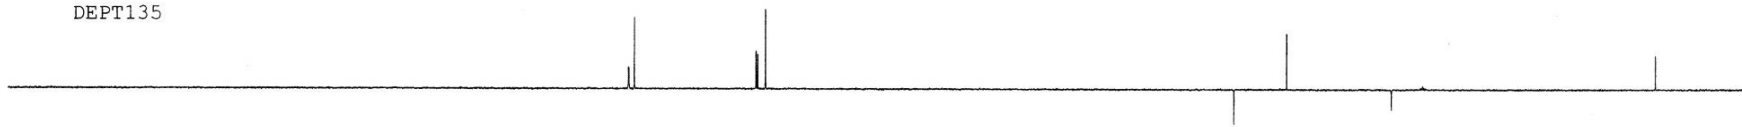

YUNNAN UNIVERSITY AVIIIHD500 DXX-3-25-2  
Sep30-2017-duxuanxuan  
C13CPD DMSO

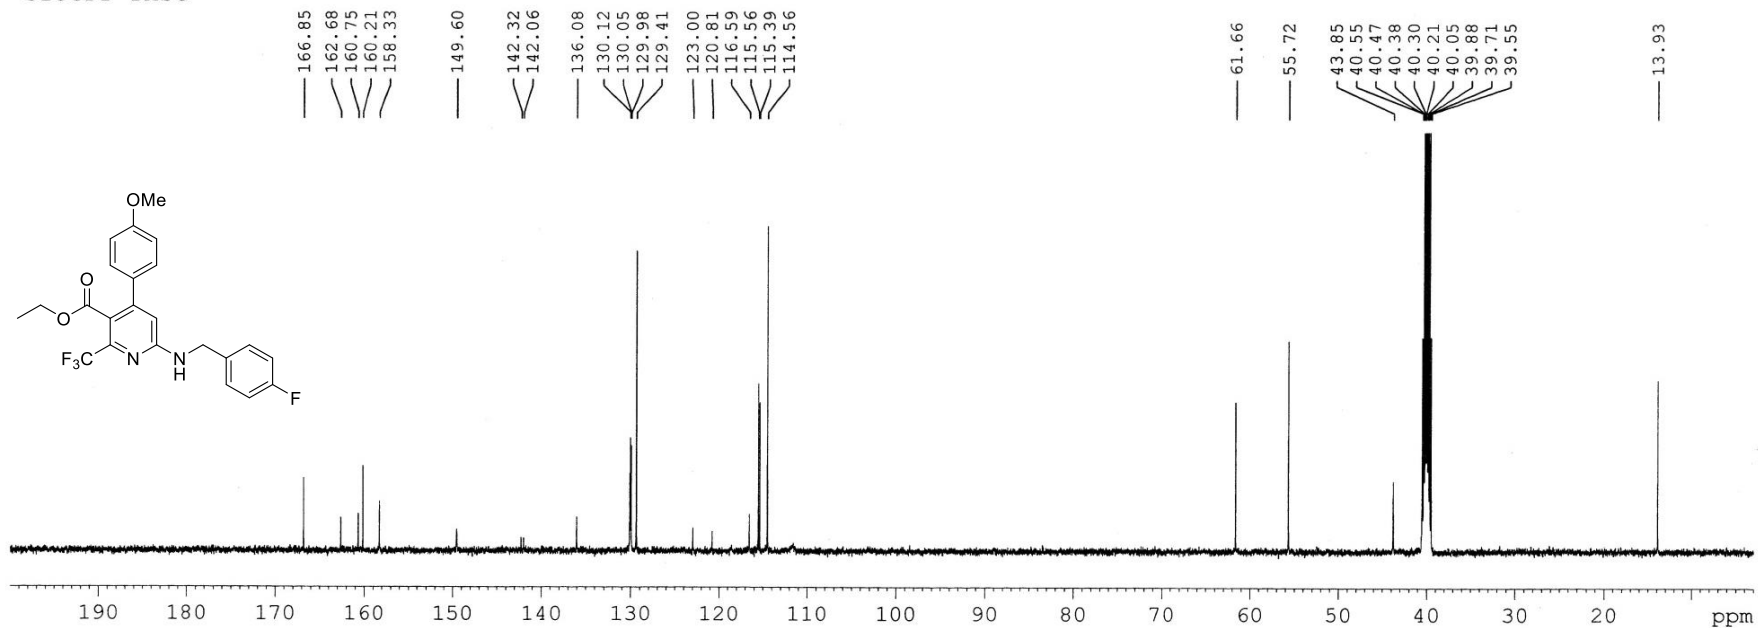

Figure S63. <sup>13</sup>C NMR (125 MHz, DMSO-*d*<sub>6</sub>) spectra of compound 5m

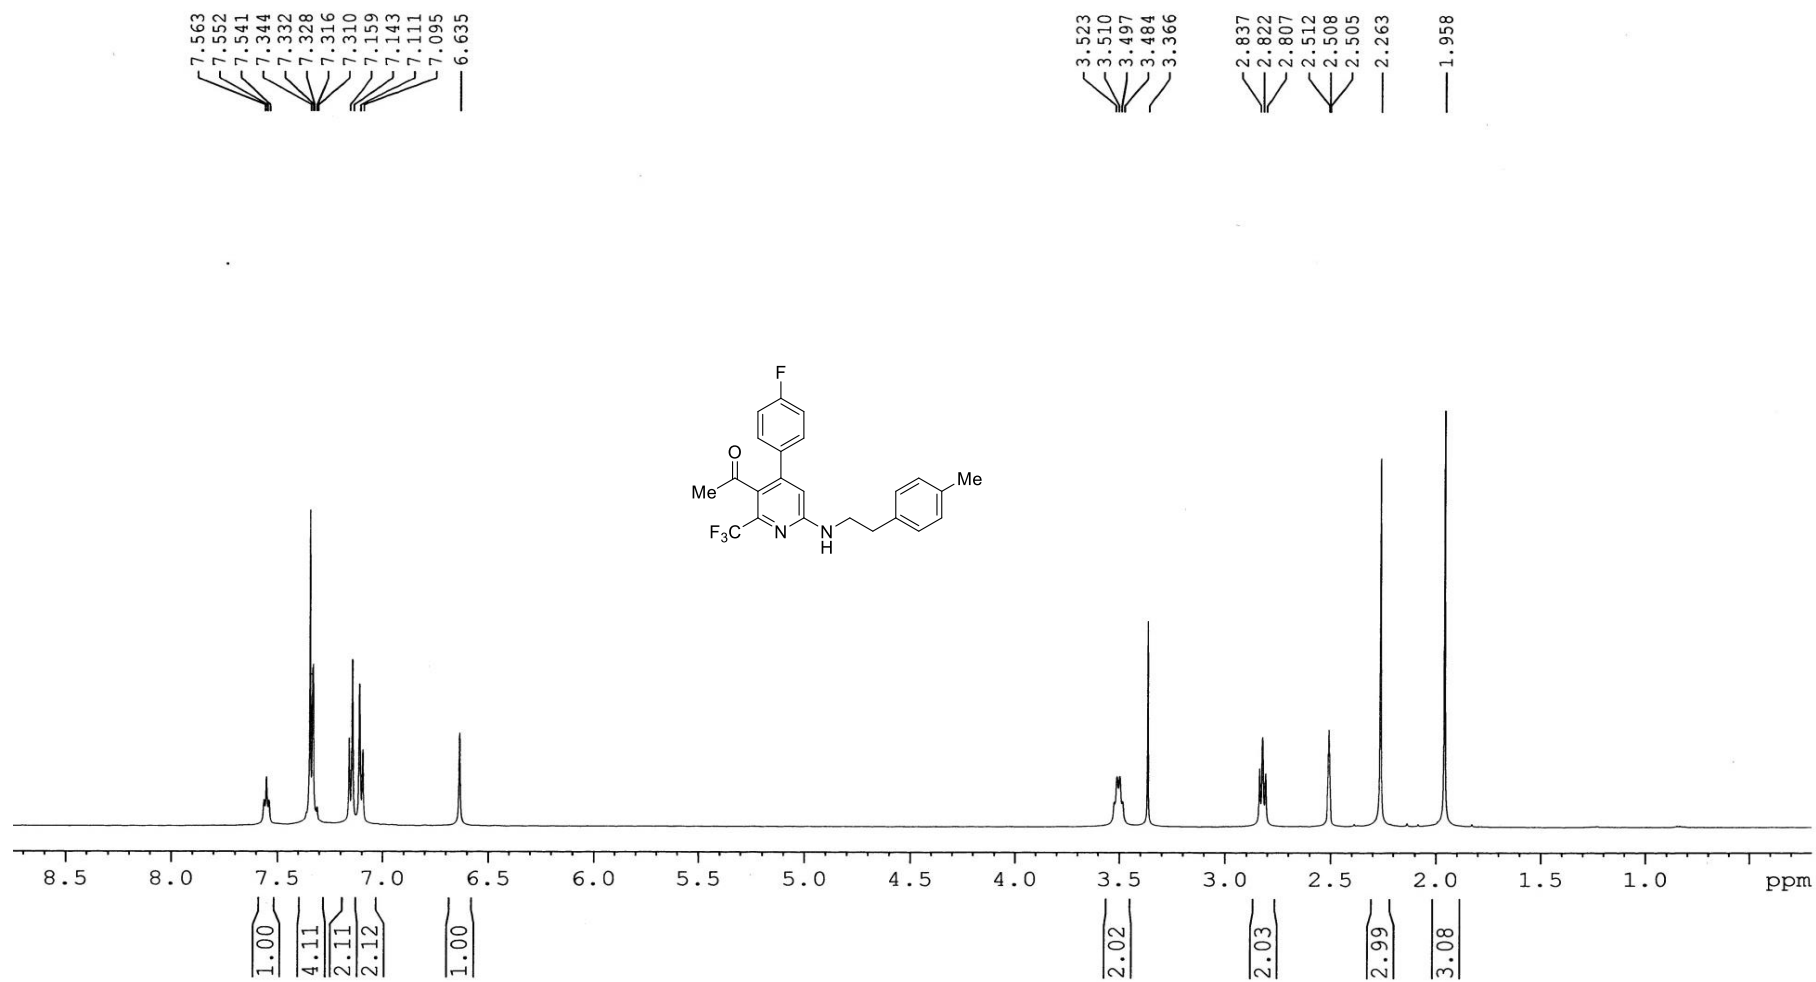

**Figure S64.** <sup>1</sup>H NMR (500 MHz, DMSO-*d*<sub>6</sub>) spectra of compound **5n**

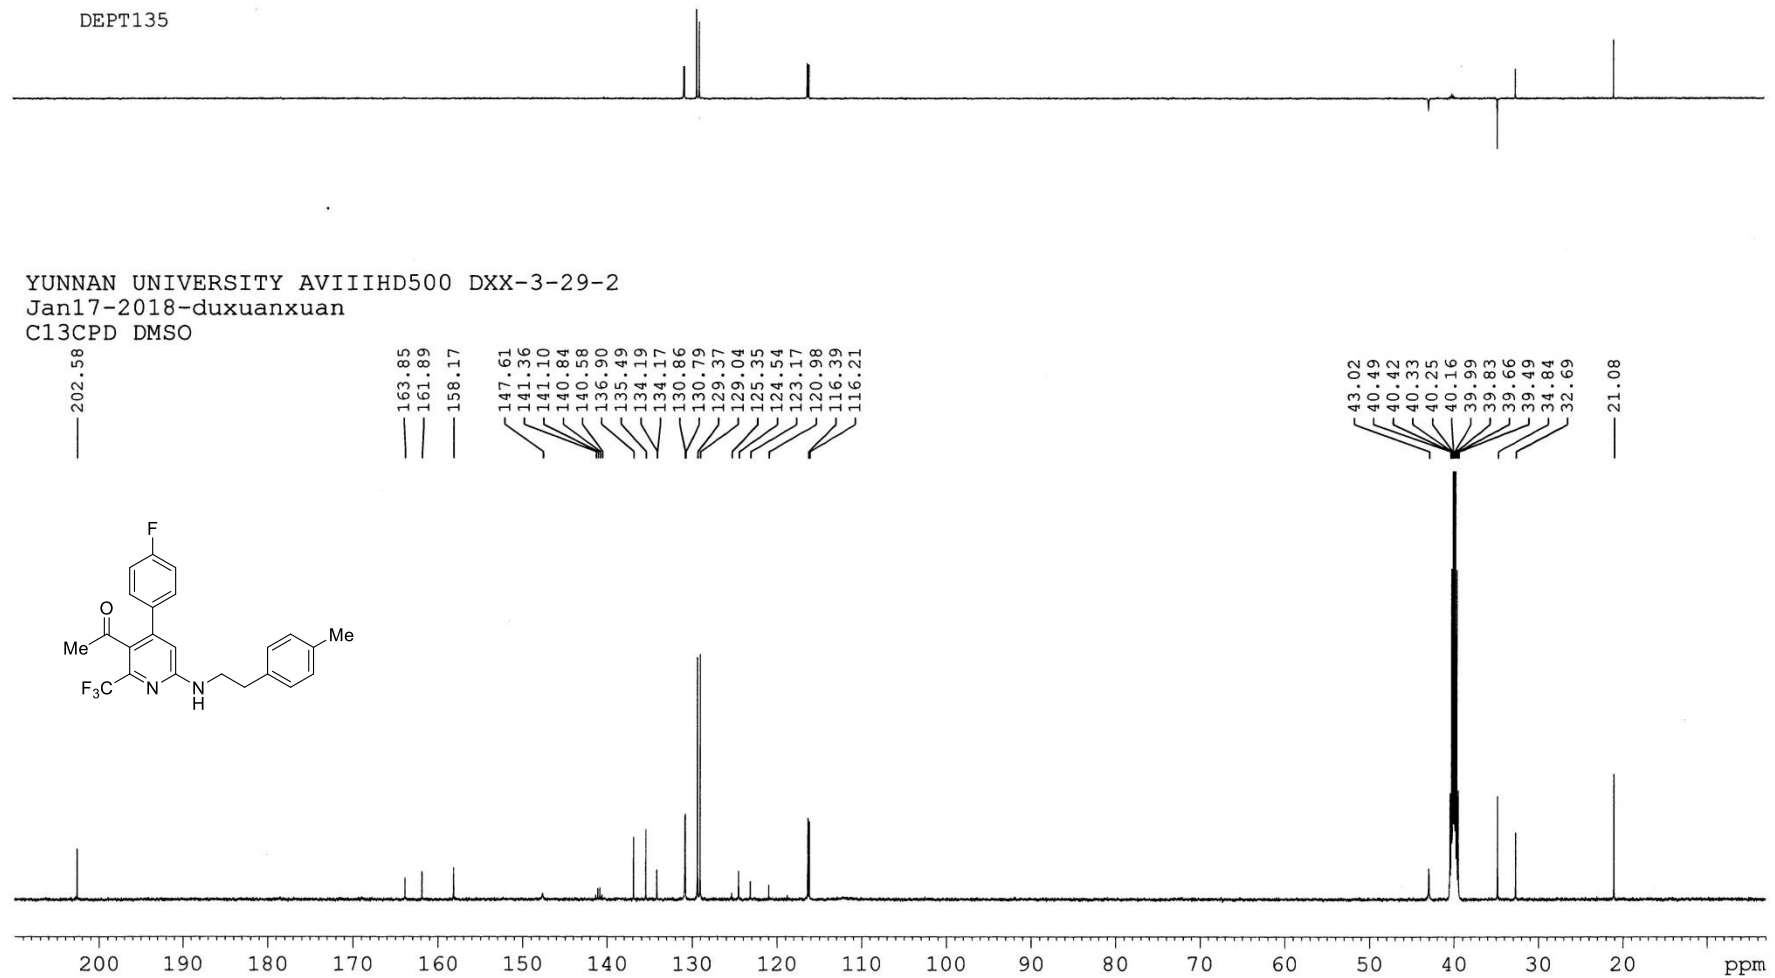

Figure S65. <sup>13</sup>C NMR (125 MHz, DMSO-*d*<sub>6</sub>) spectra of compound **5n**

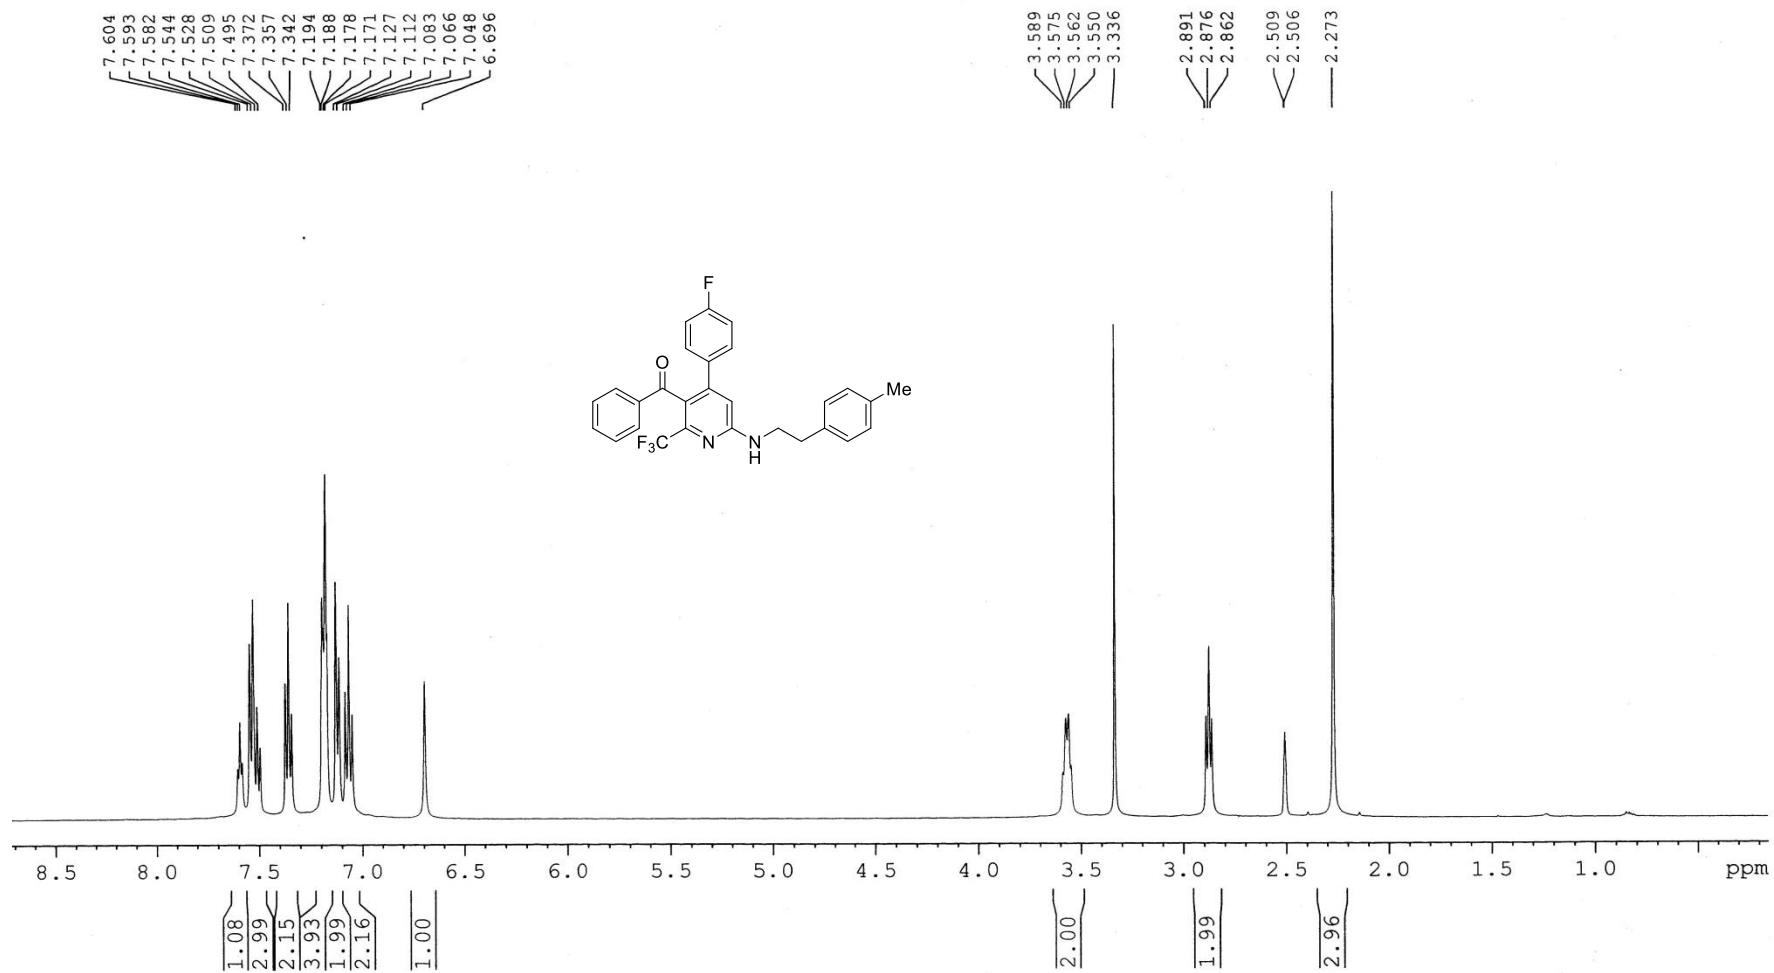

**Figure S66.** <sup>1</sup>H NMR (500 MHz, DMSO-*d*<sub>6</sub>) spectra of compound **5o**

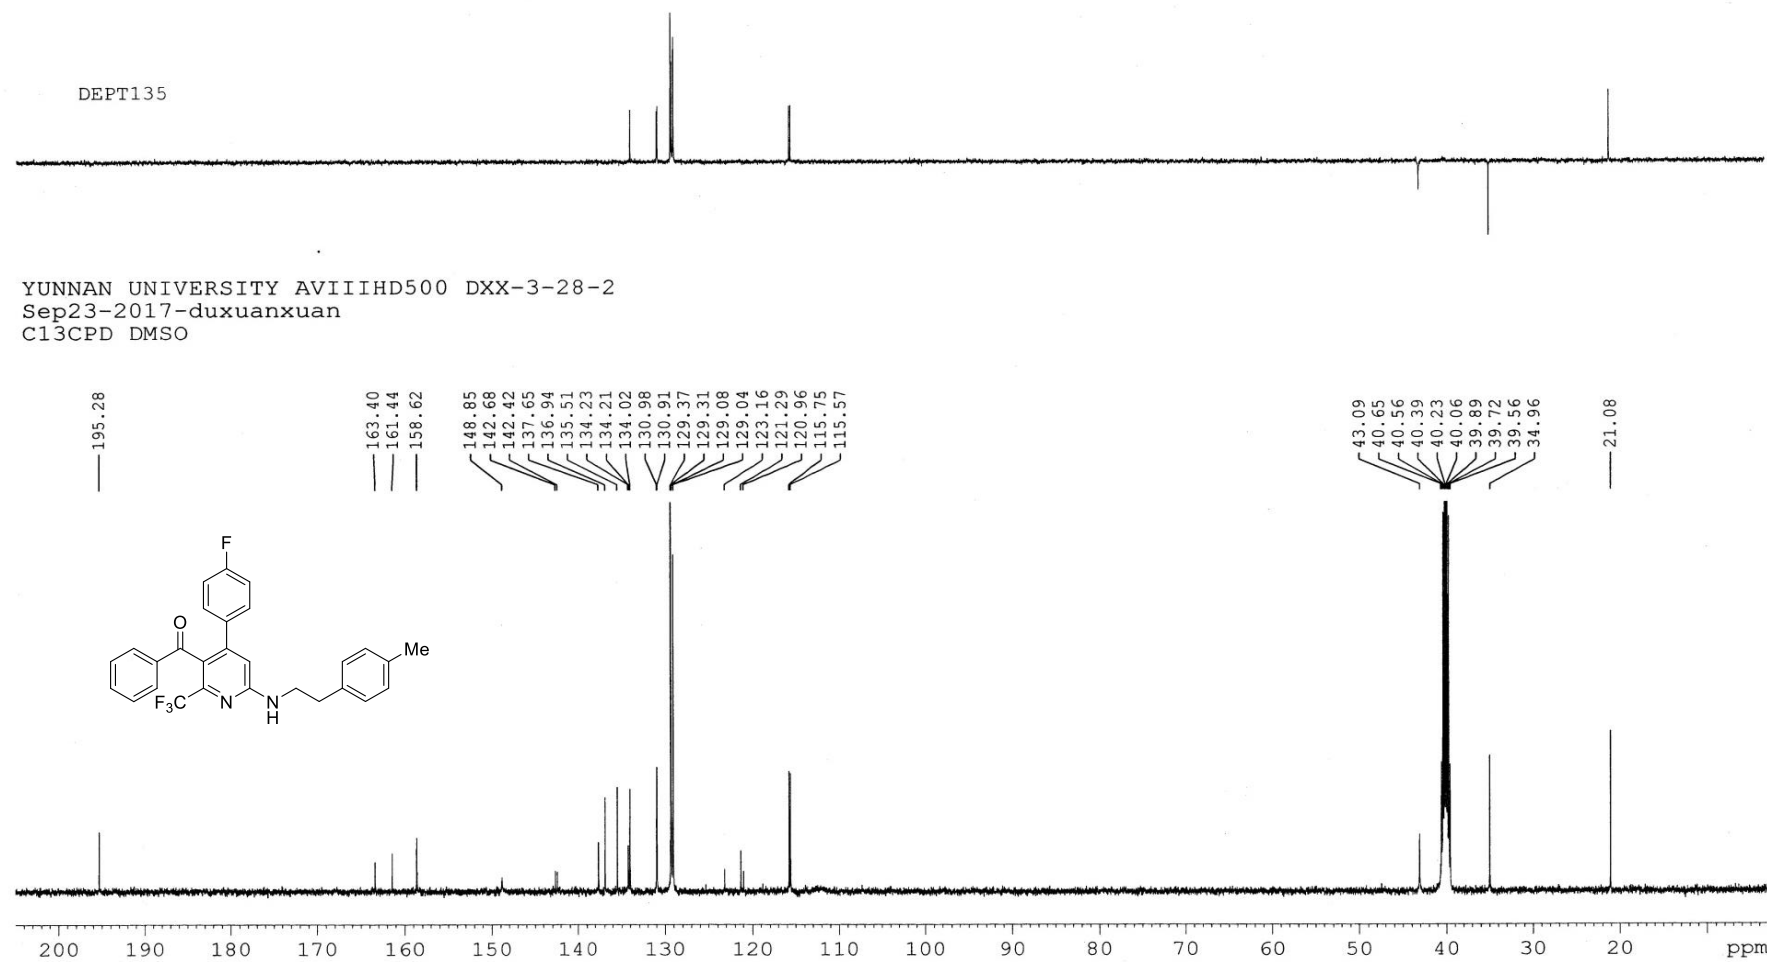

Figure S67.  $^{13}\text{C}$  NMR (125 MHz, DMSO- $d_6$ ) spectra of compound **50**

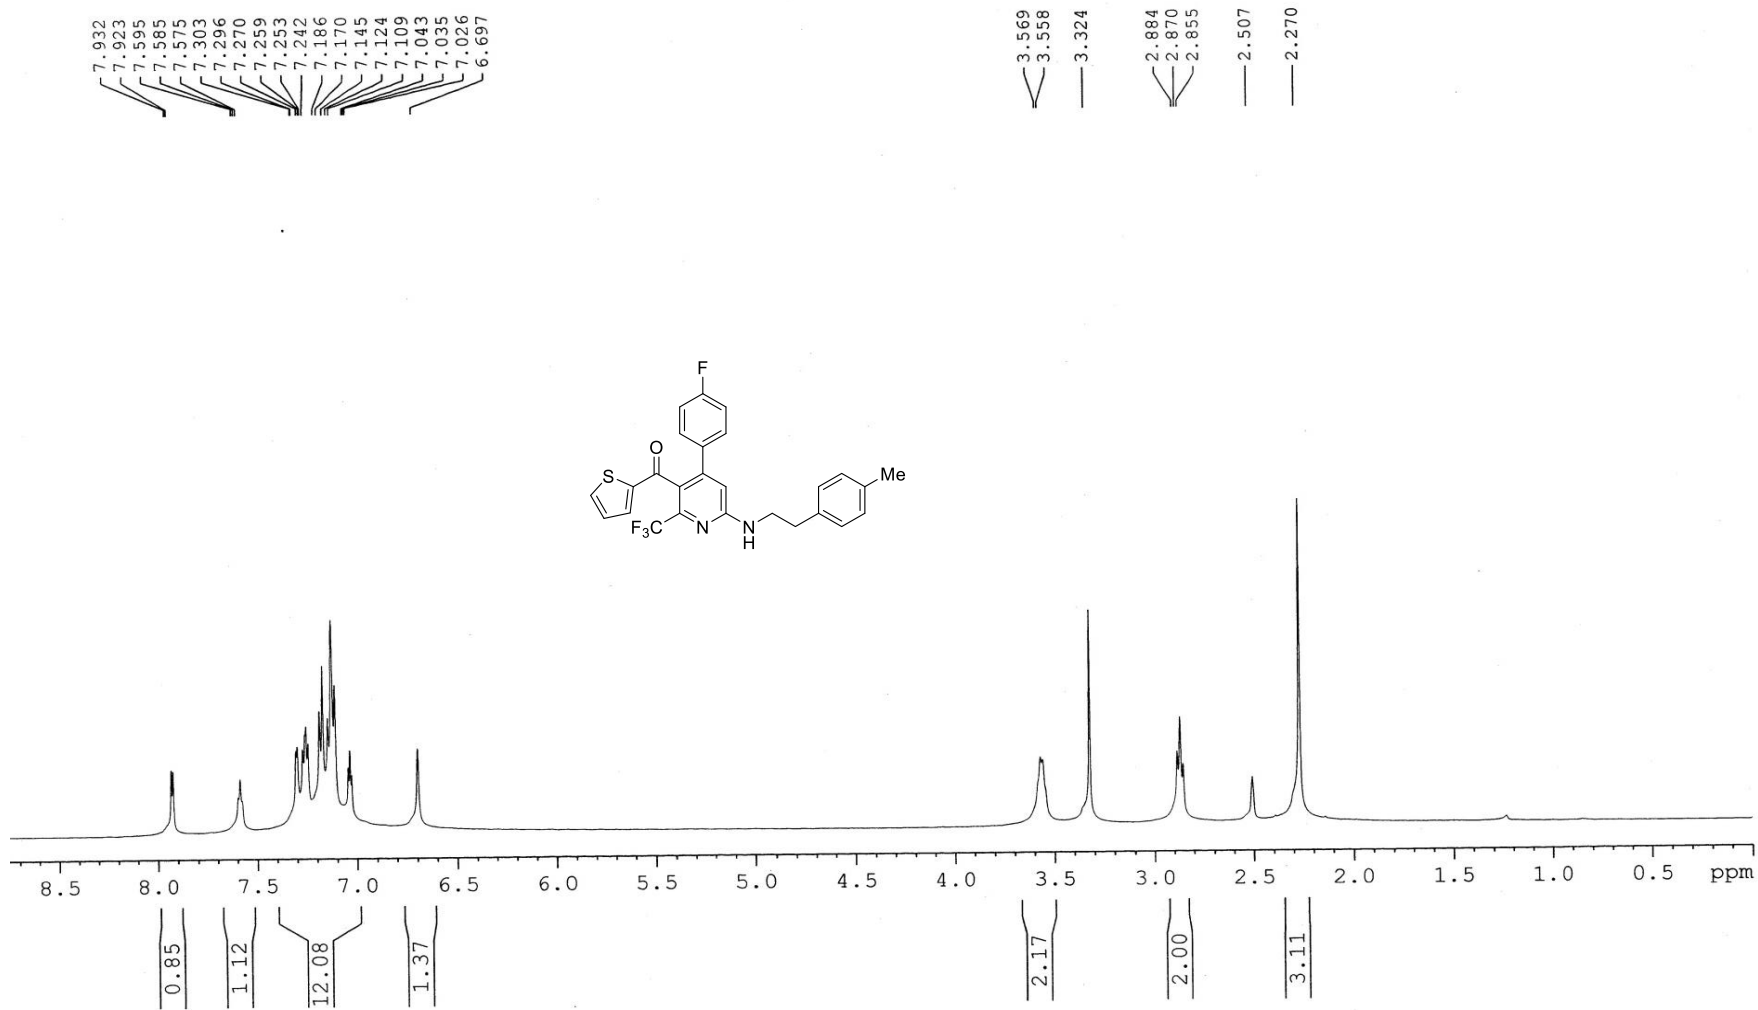

**Figure S68.**  $^1\text{H}$  NMR (500 MHz,  $\text{DMSO-}d_6$ ) spectra of compound **5p**

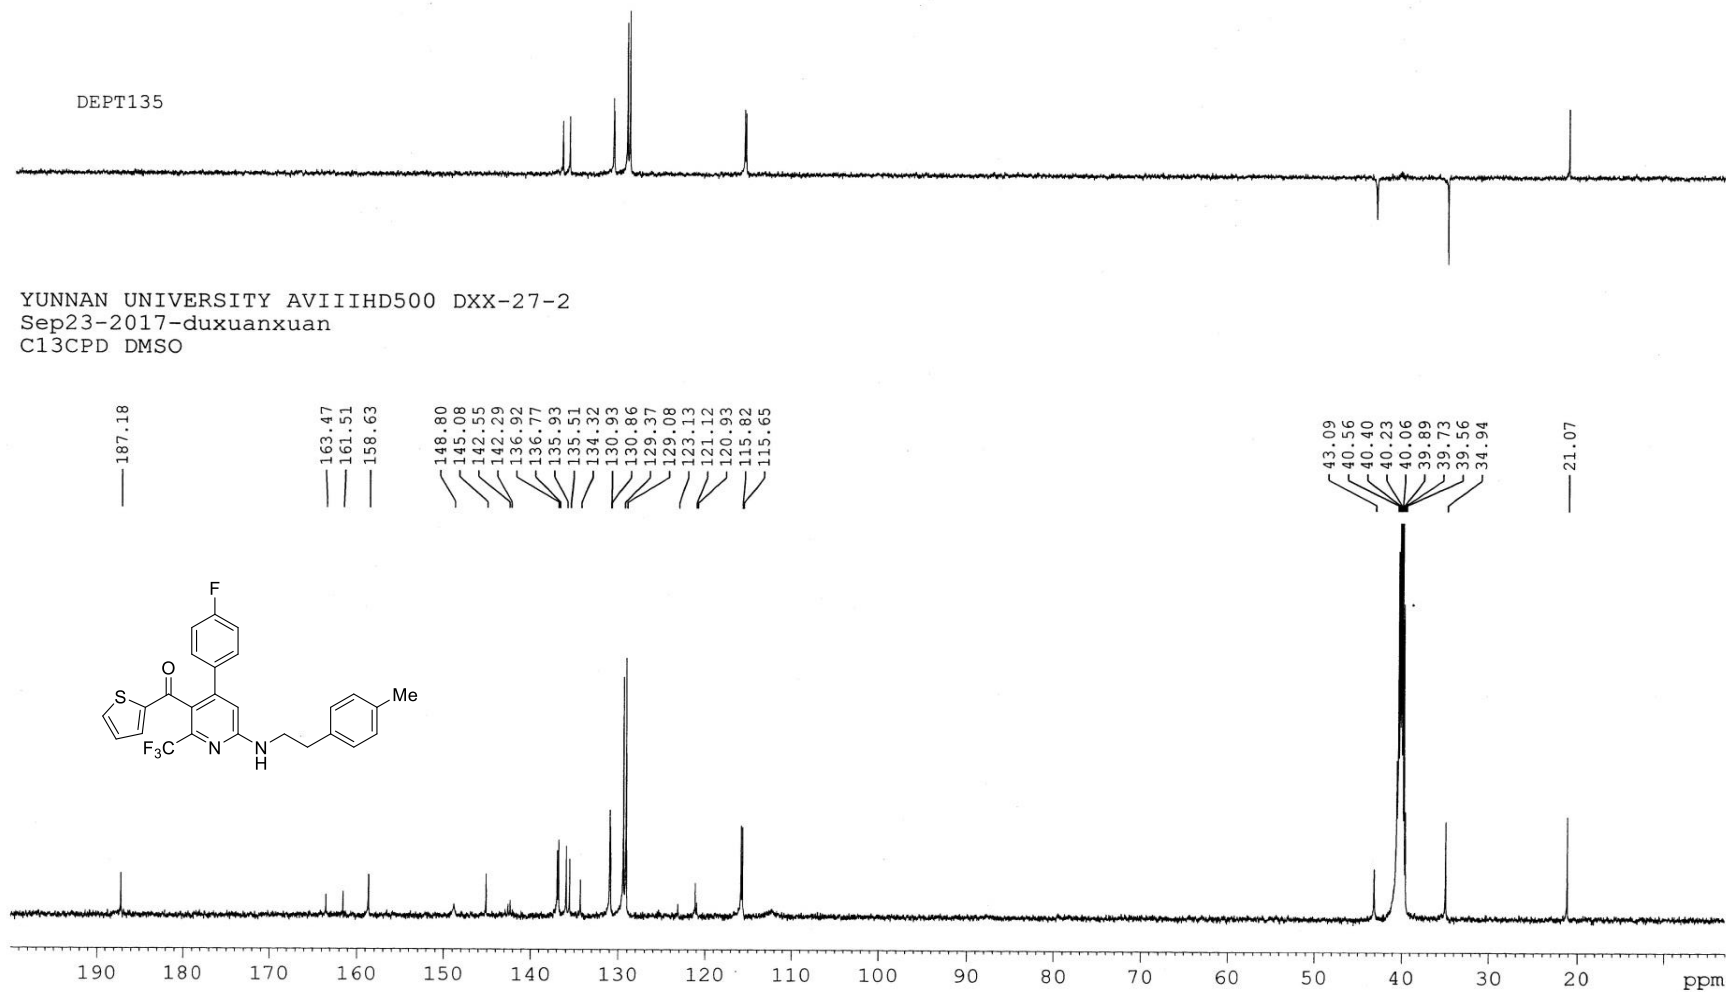

**Figure S69.**  $^{13}\text{C}$  NMR (125 MHz,  $\text{DMSO-}d_6$ ) spectra of compound **5p**



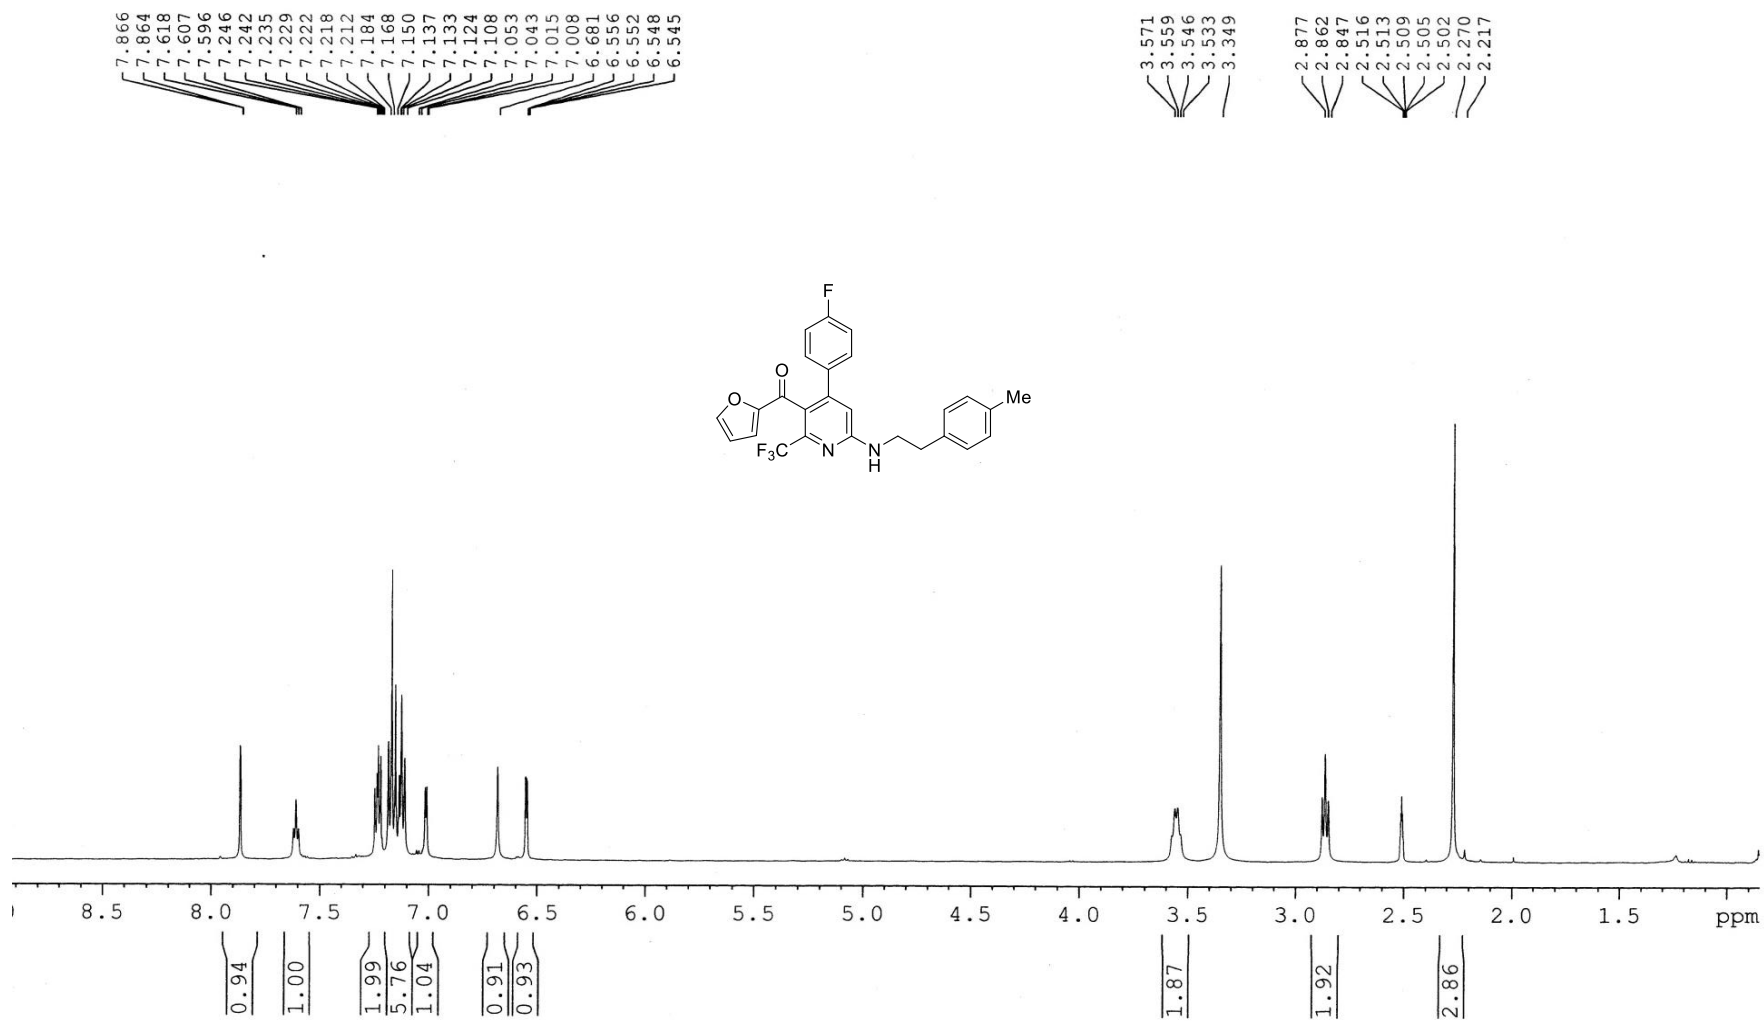

**Figure S70.** <sup>1</sup>H NMR (500 MHz, DMSO-*d*<sub>6</sub>) spectra of compound **5q**

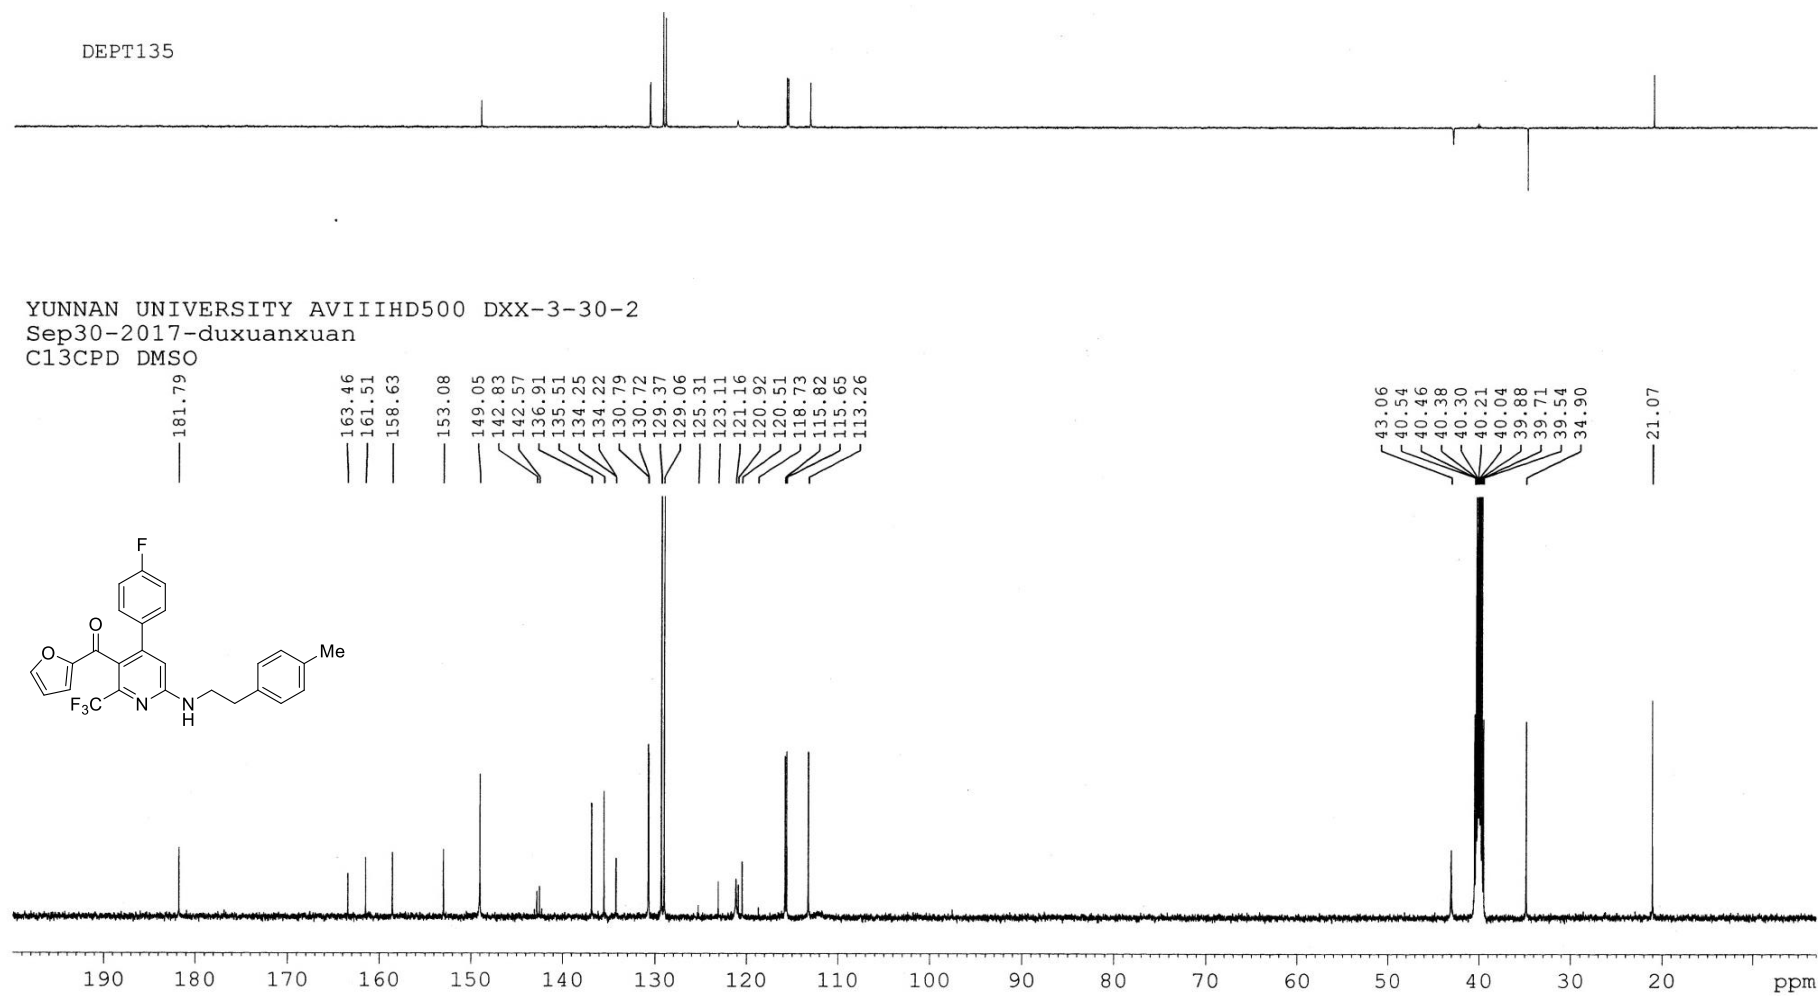

Figure S71.  $^{13}\text{C}$  NMR (125 MHz,  $\text{DMSO-}d_6$ ) spectra of compound **5q**

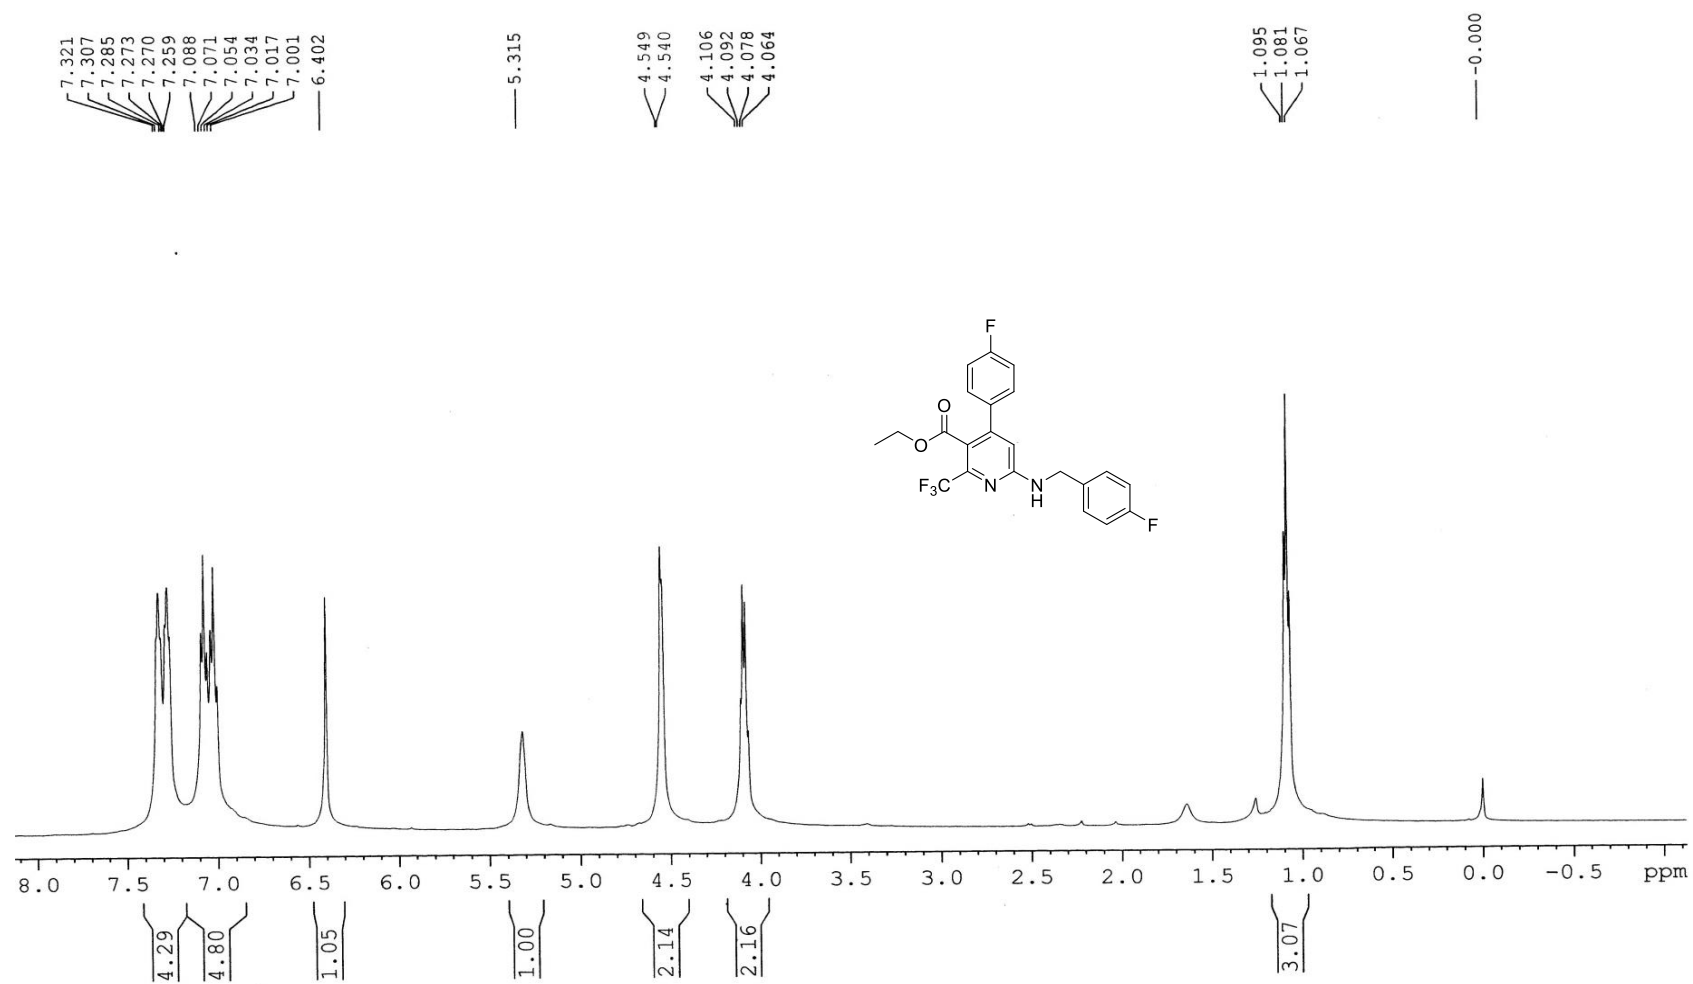

Figure S72.  $^1\text{H}$  NMR (500 MHz,  $\text{CDCl}_3$ ) spectra of compound **5r**

DEPT135

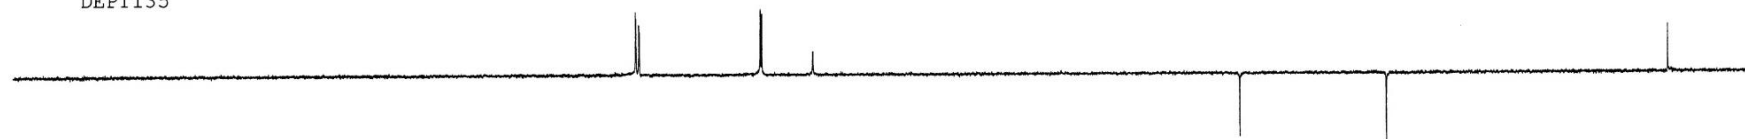

YUNNAN UNIVERSITY AVIIIHD500 DXX-3-13-2  
Jul26-2017-duxuanxuan  
C13CPD CDCl3

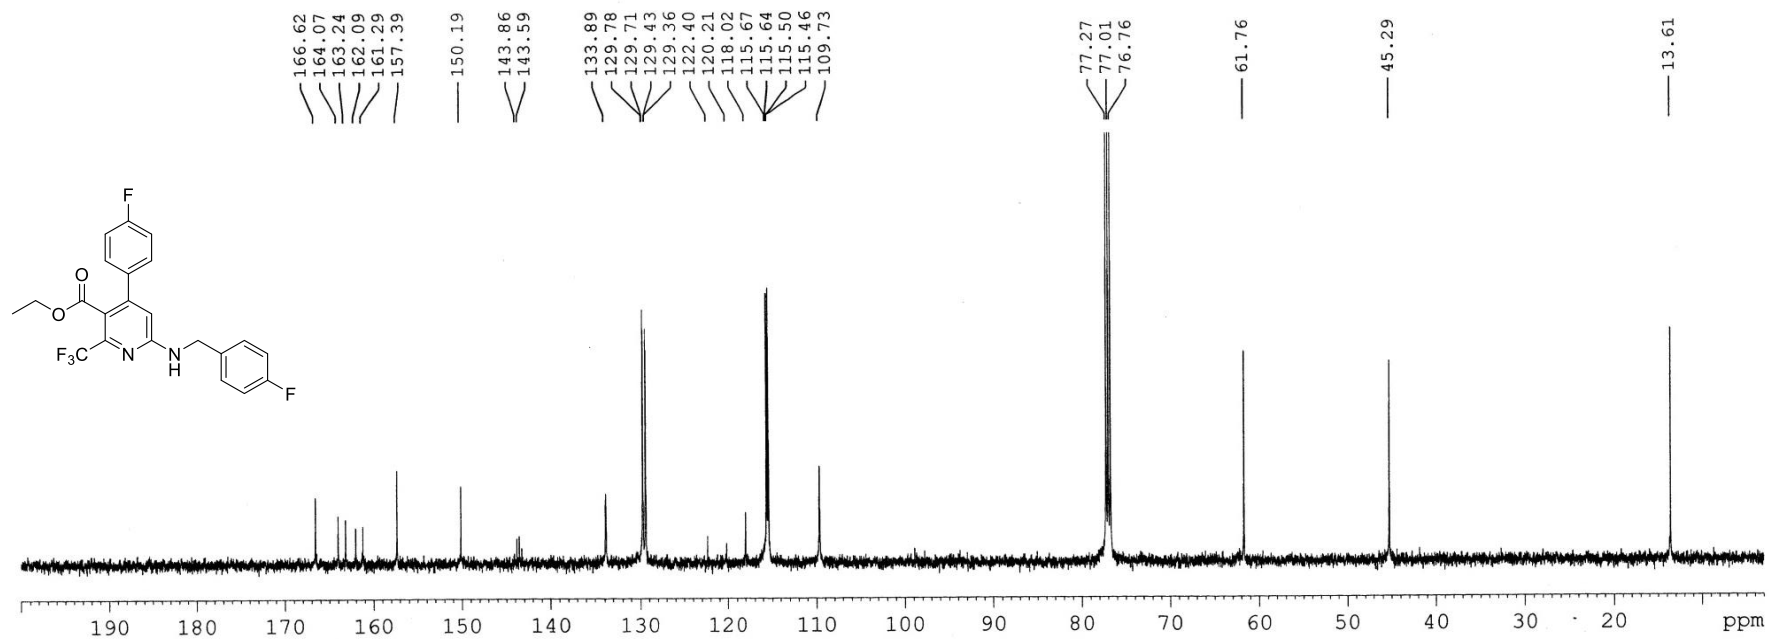

Figure S73.  $^{13}\text{C}$  NMR (125 MHz,  $\text{CDCl}_3$ ) spectra of compound 5r

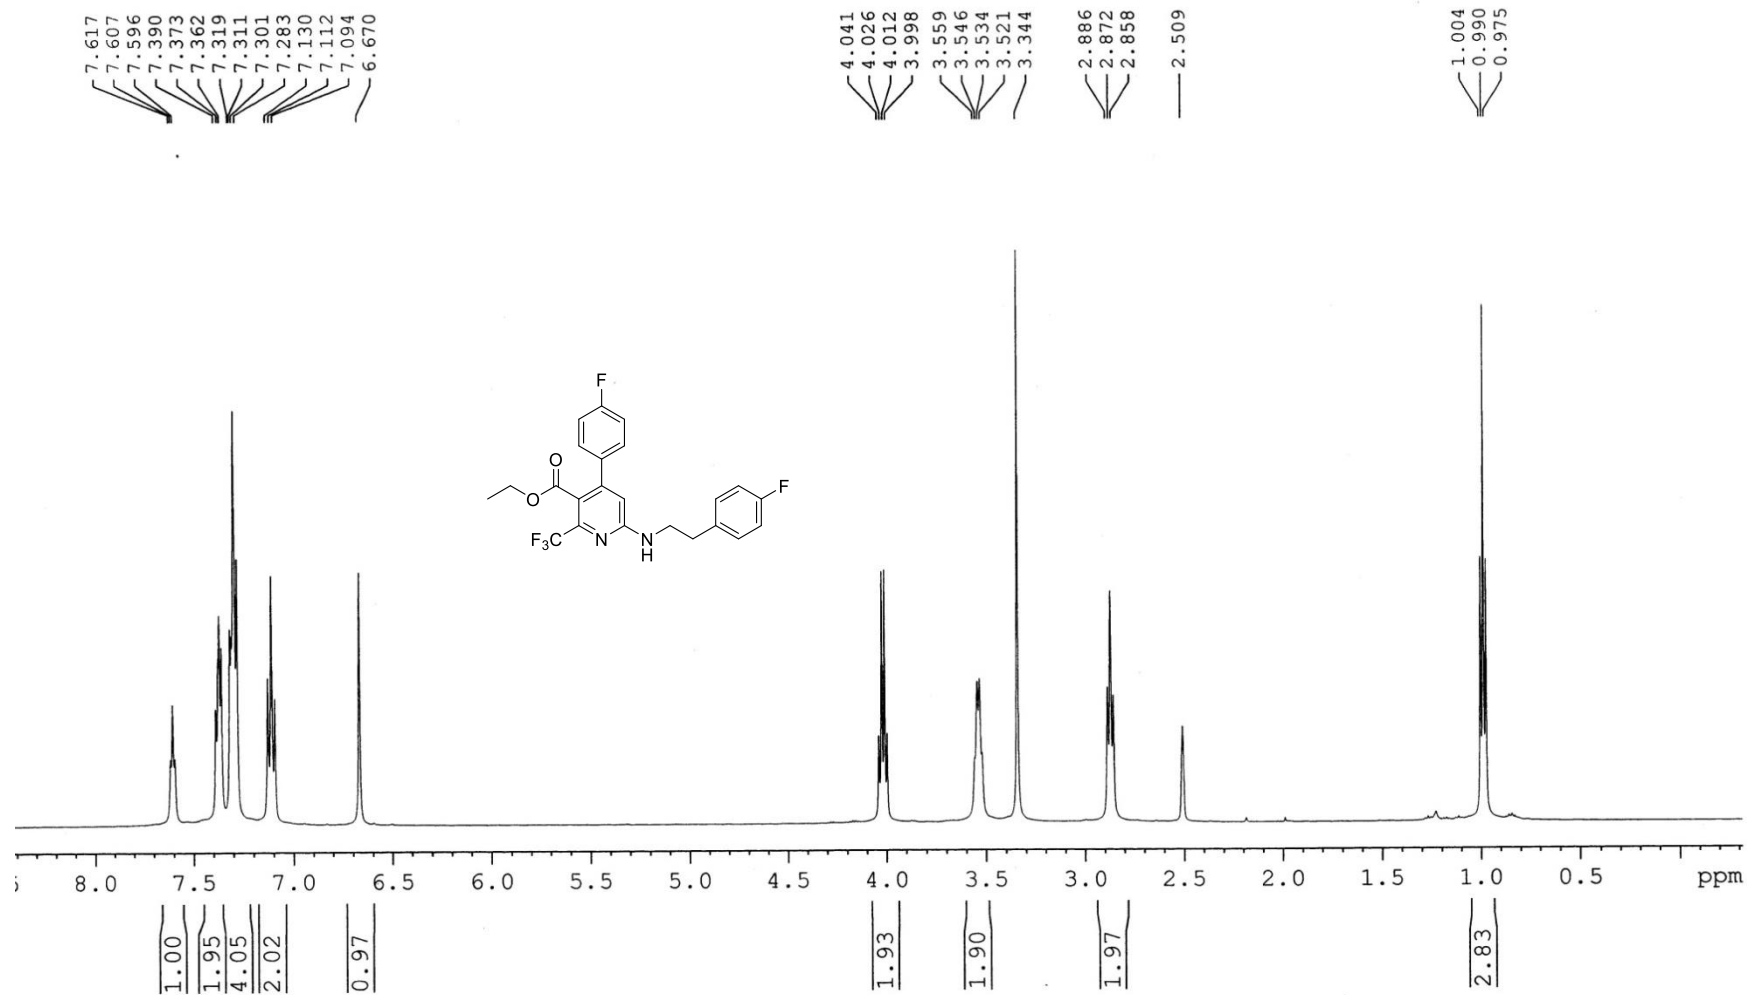

Figure S74. <sup>1</sup>H NMR (500 MHz, DMSO-*d*<sub>6</sub>) spectra of compound 5s

DEPT135

YUNNAN UNIVERSITY AVIIIHD500 DXX-3-2-2  
Jun23-2017-duxuanxuan  
C13CPD DMSO

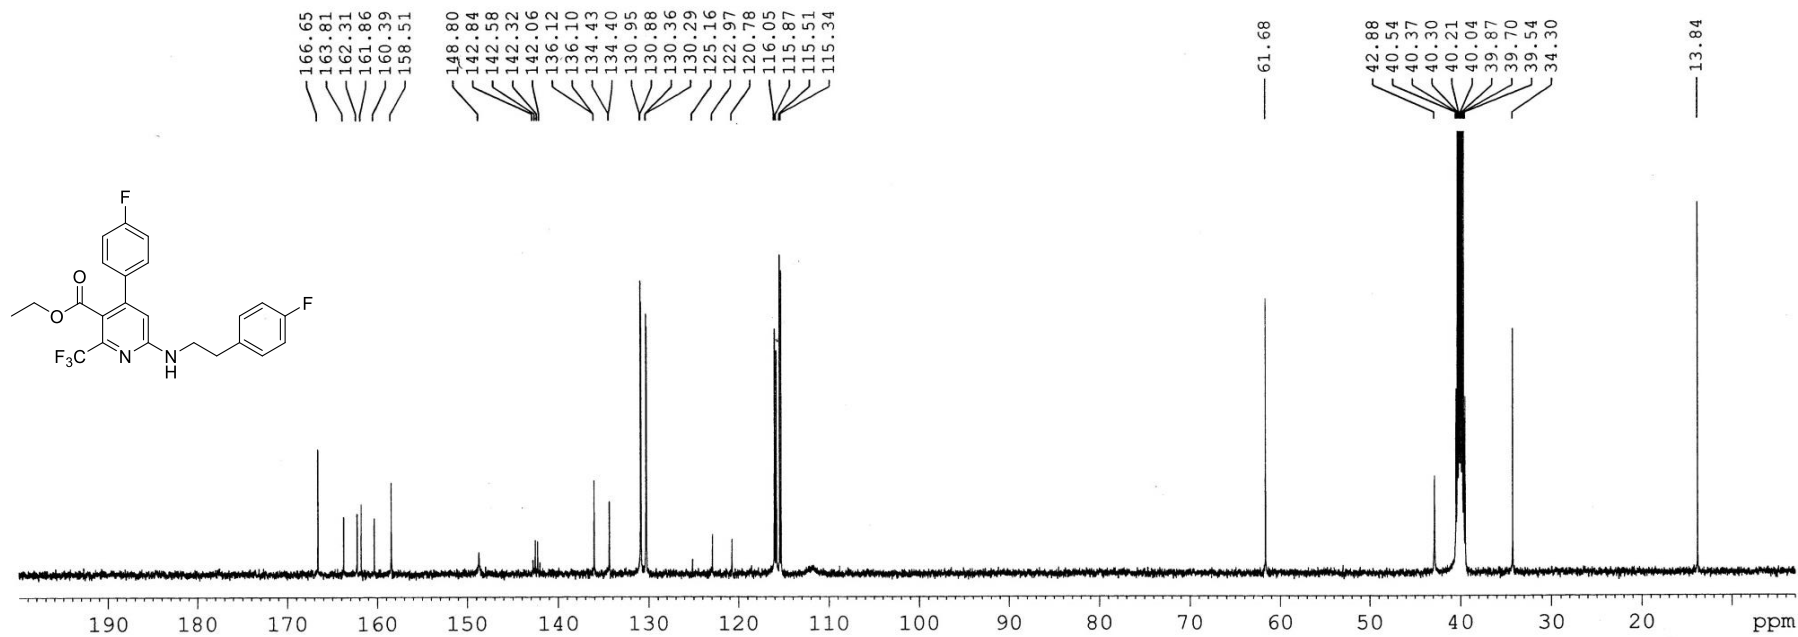

Figure S75.  $^{13}\text{C}$  NMR (125 MHz,  $\text{DMSO-}d_6$ ) spectra of compound 5s

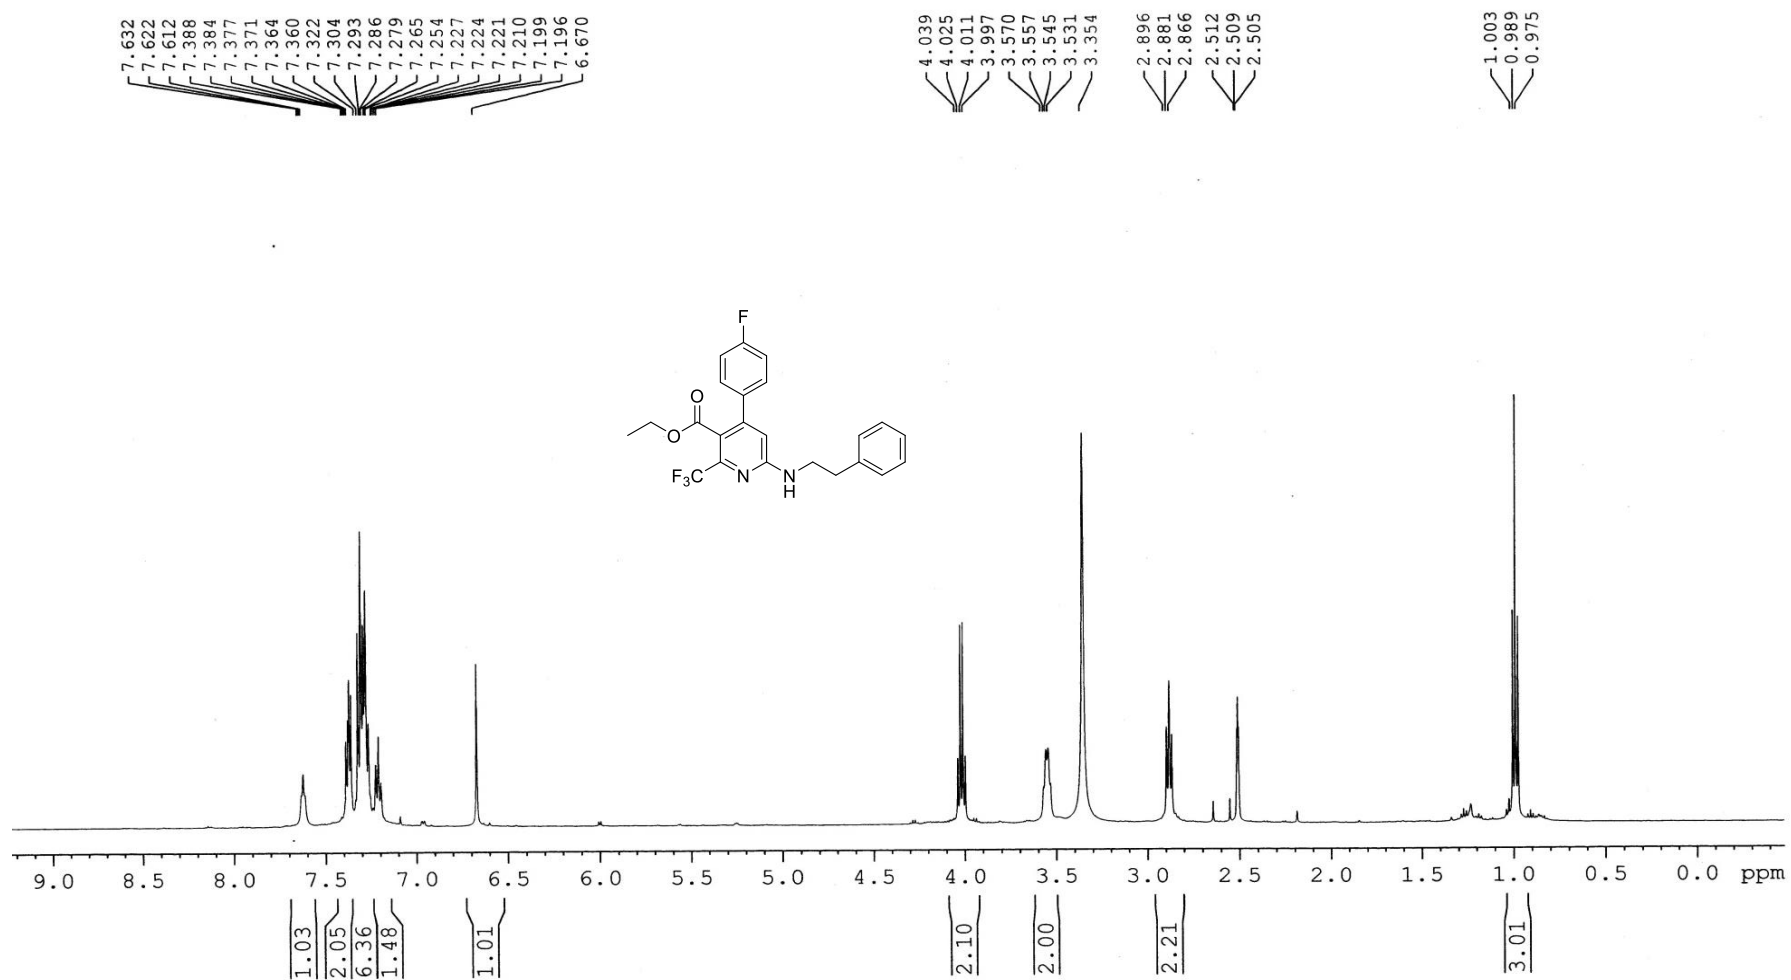

**Figure S76.** <sup>1</sup>H NMR (500 MHz, DMSO-*d*<sub>6</sub>) spectra of compound **5t**

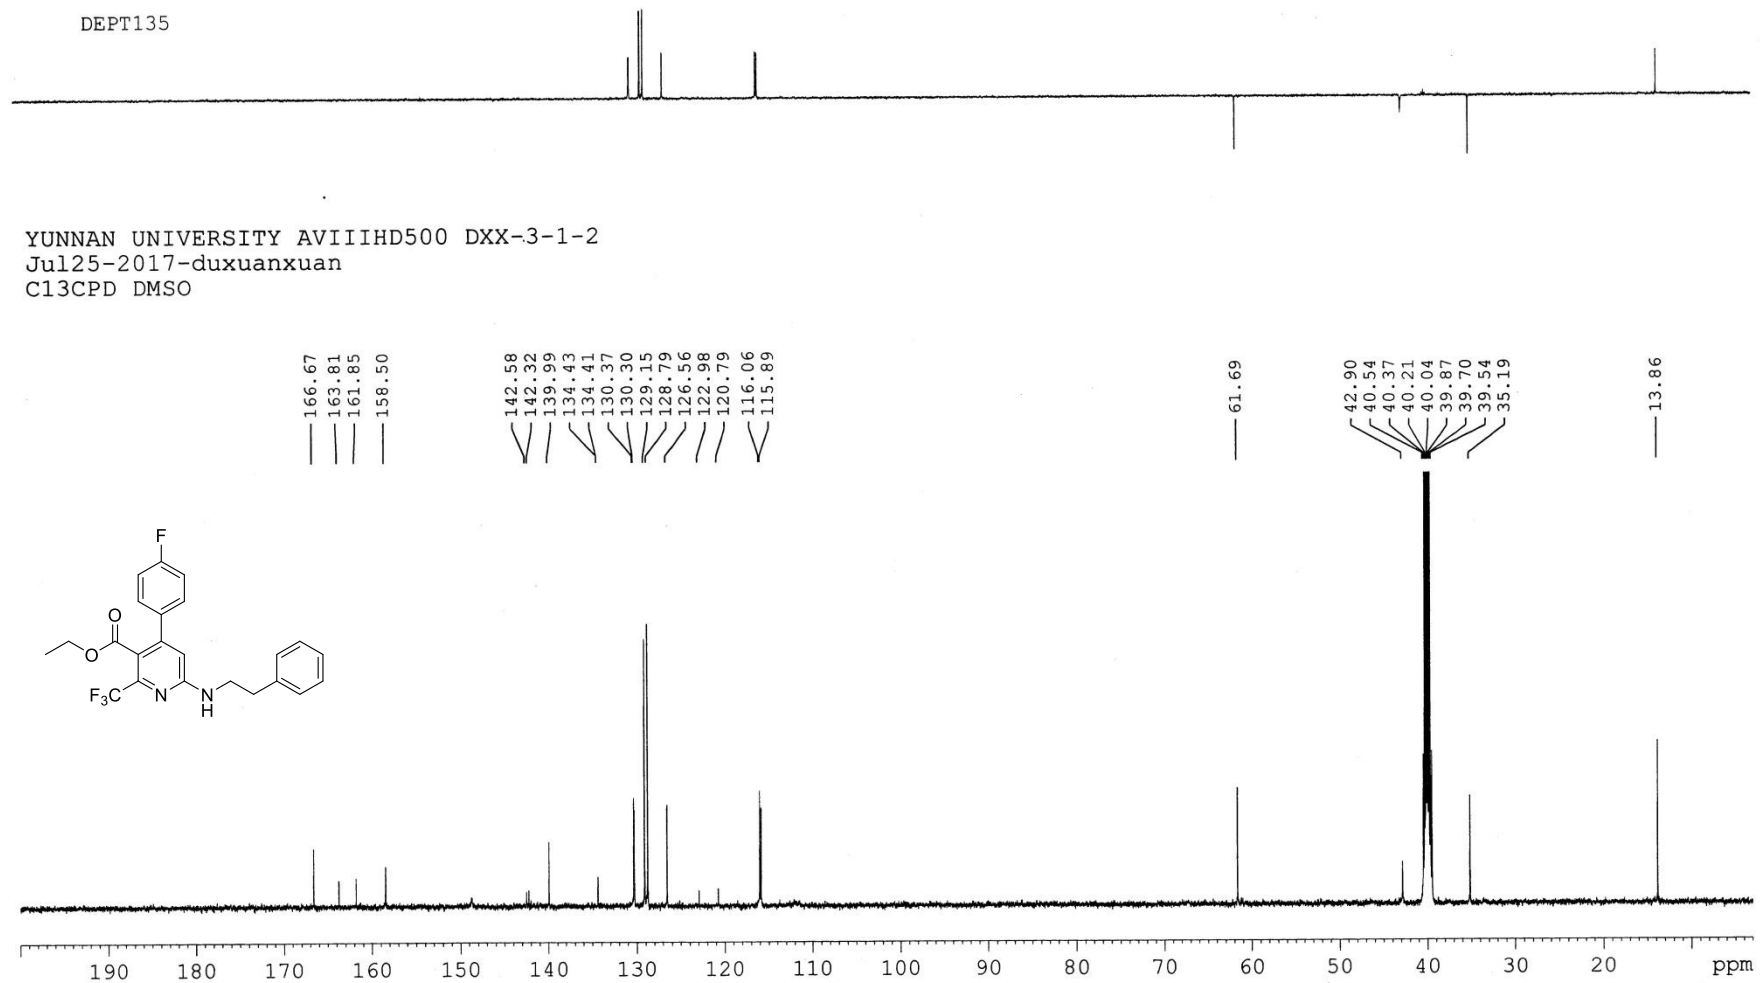

Figure S77. <sup>13</sup>C NMR (125 MHz, DMSO-*d*<sub>6</sub>) spectra of compound **5t**



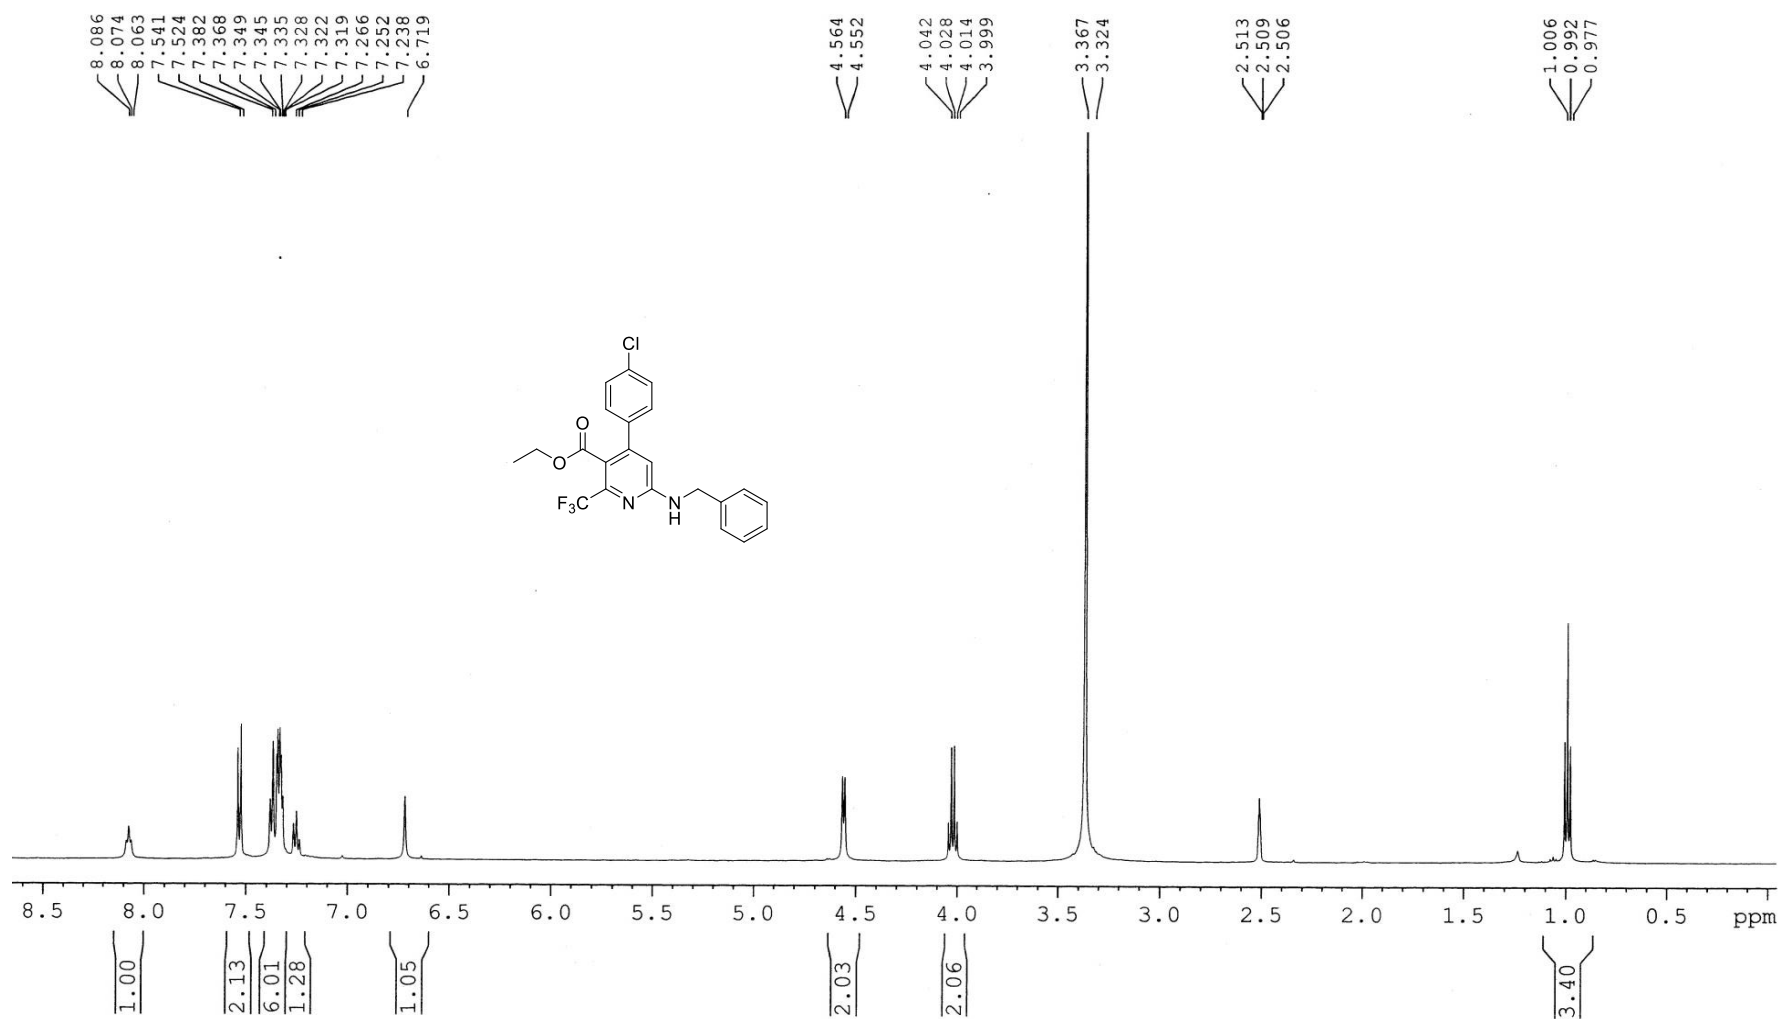

**Figure S78.** <sup>1</sup>H NMR (500 MHz, DMSO-*d*<sub>6</sub>) spectra of compound **5u**

DEPT135

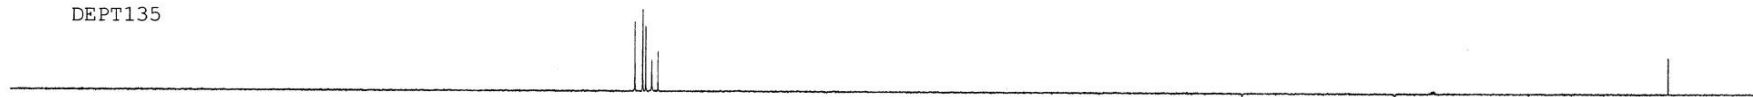

YUNNAN UNIVERSITY AVIIIHD500 DXX-3-16-2  
Sep30-2017-duxuanxuan  
C13CPD DMSO

166.51 158.43 148.70 142.60 142.34 139.72 136.80 134.20 129.95 128.11 128.79 128.08 127.39 122.90 120.71 116.14 61.79 44.57 40.52 40.44 40.35 40.18 40.01 39.85 39.68 39.51 13.84

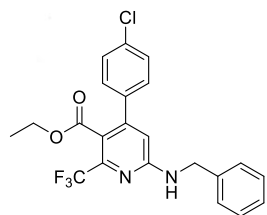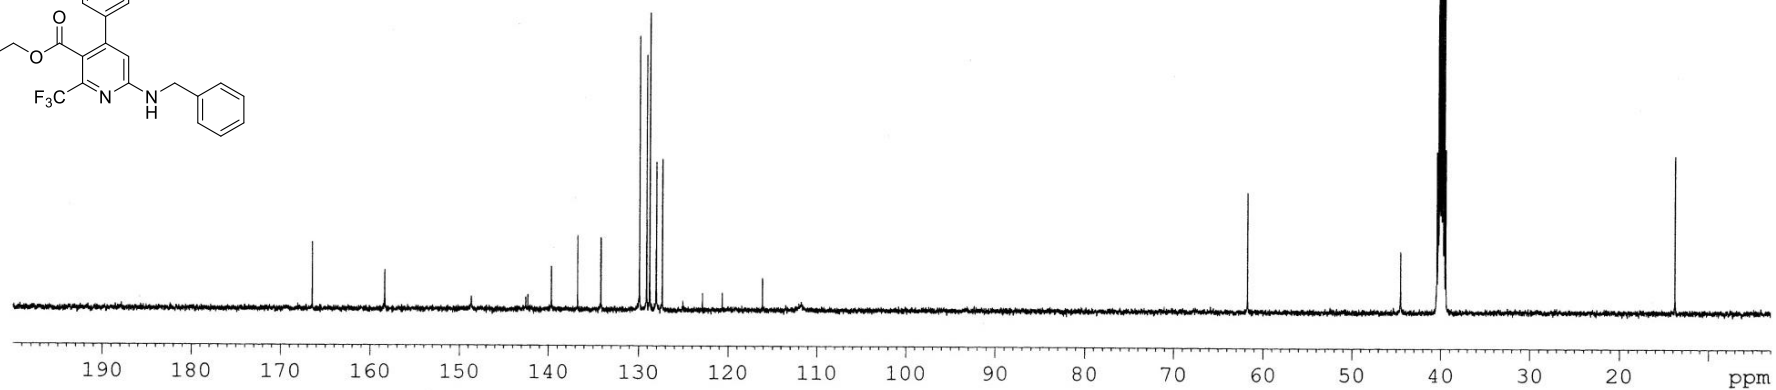

Figure S79.  $^{13}\text{C}$  NMR (125 MHz,  $\text{DMSO-}d_6$ ) spectra of compound **5u**

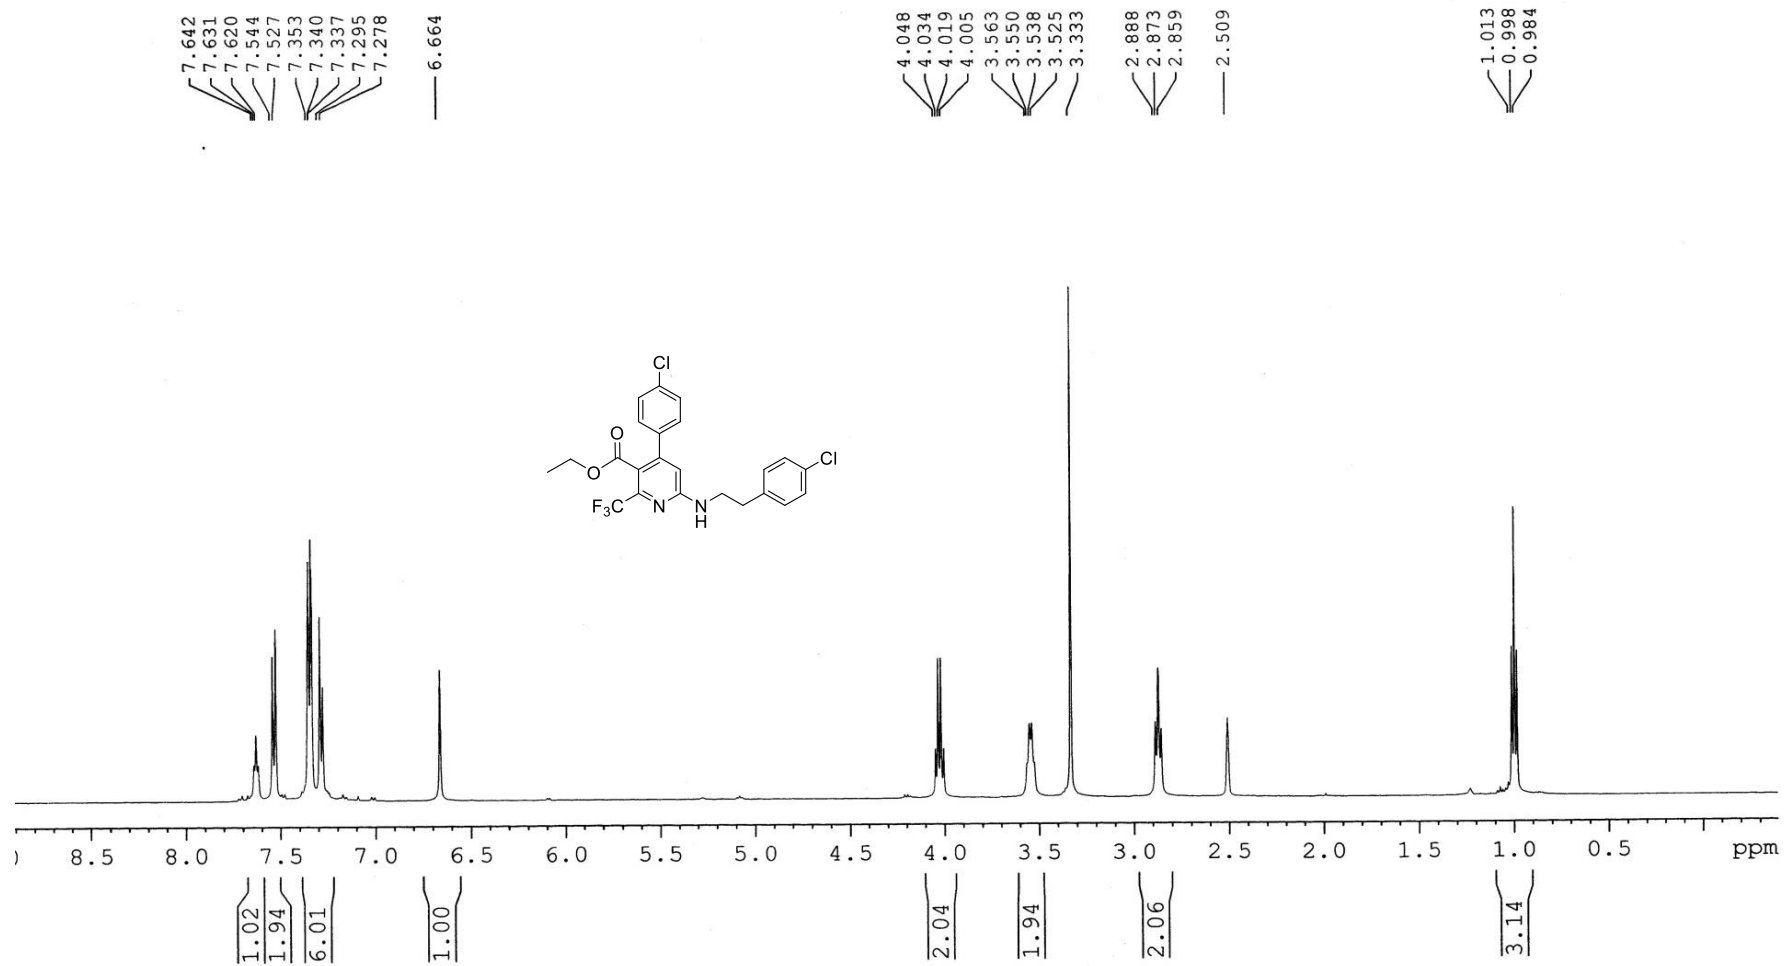

**Figure S80.**  $^1\text{H}$  NMR (500 MHz,  $\text{DMSO-}d_6$ ) spectra of compound 5v

DEPT135

YUNNAN UNIVERSITY AVIIIHD500 DXX-3-9-2  
Jun23-2017-duxuanxuan  
C13CPD DMSO

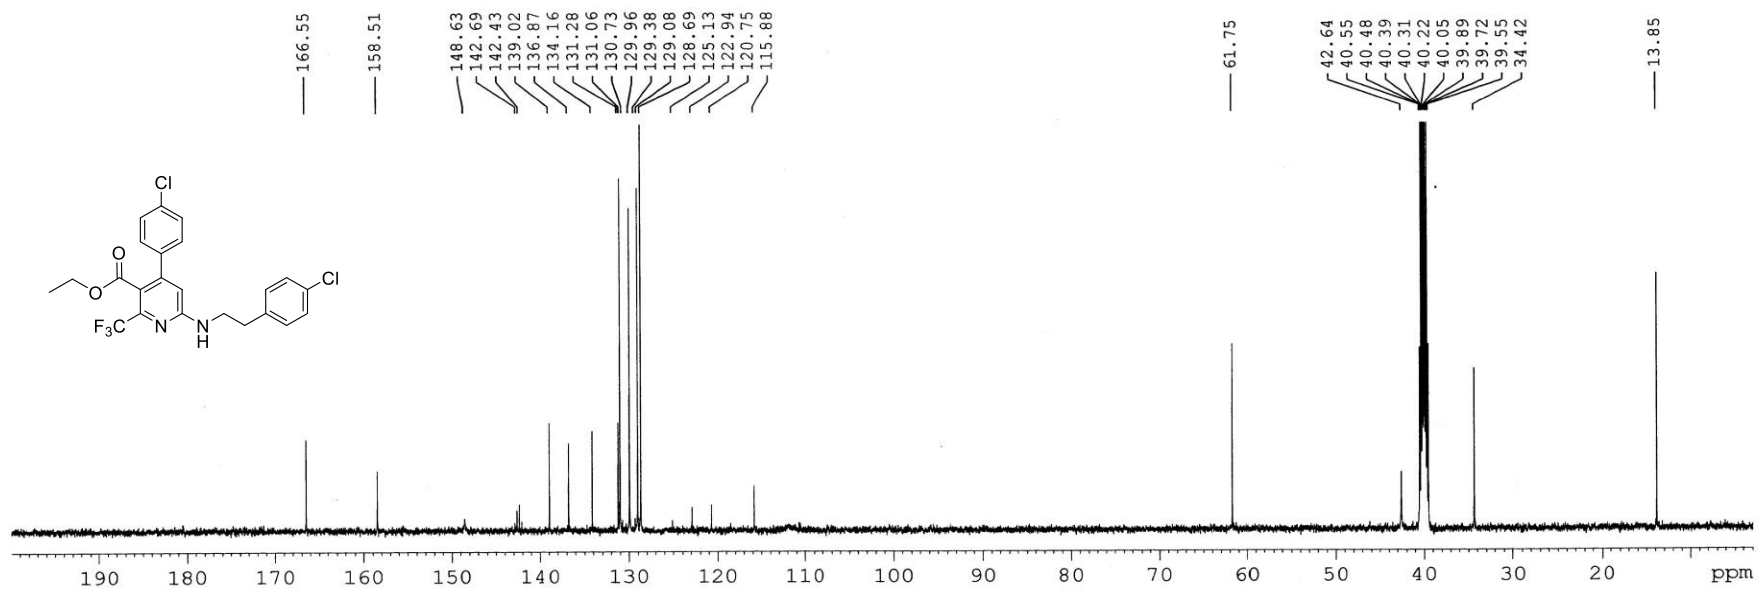

Figure S81.  $^{13}\text{C}$  NMR (125 MHz,  $\text{DMSO-}d_6$ ) spectra of compound 5v

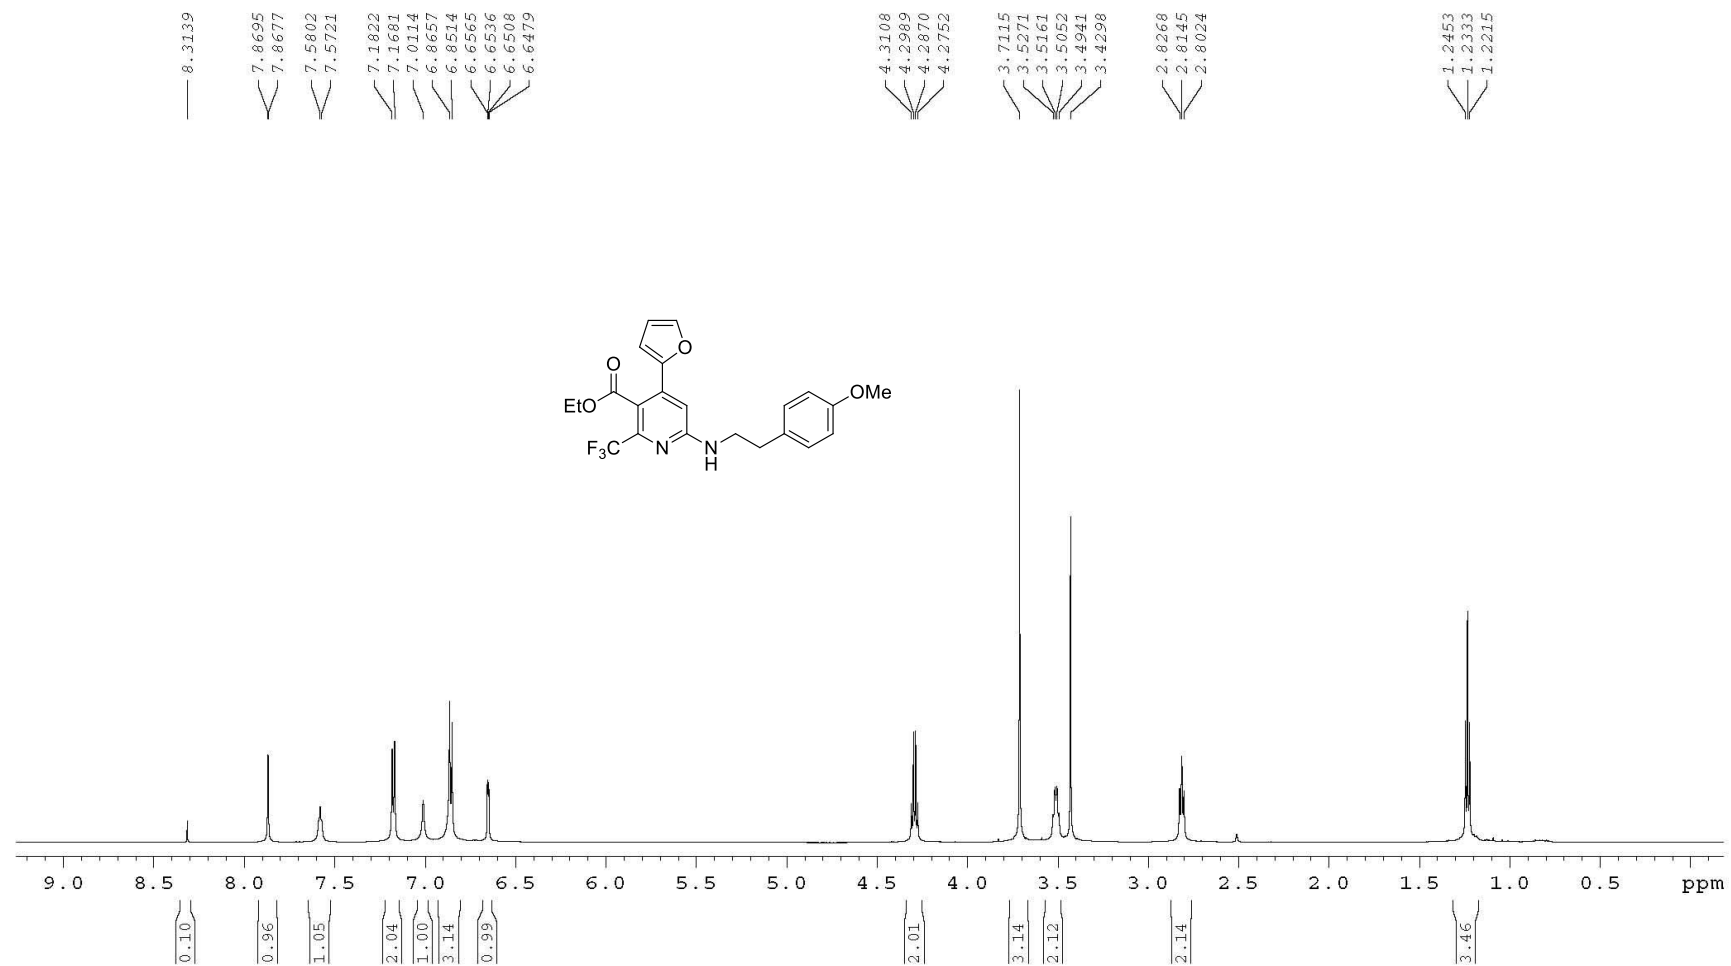

**Figure S82.** <sup>1</sup>H NMR (600 MHz, DMSO-*d*<sub>6</sub>) spectra of compound **5w**

DEPT135

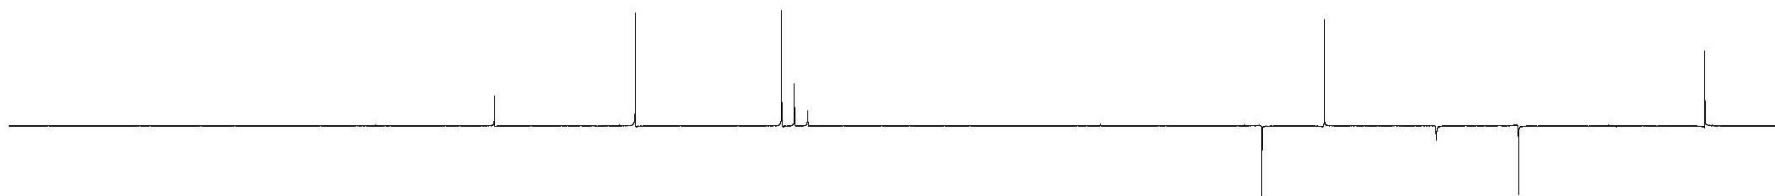

YUNNAN UNIVERSITY ASCEND AVIIIHD600 YSJ-2  
Jan15-2019-ziquanxing  
C13CPD DMSO

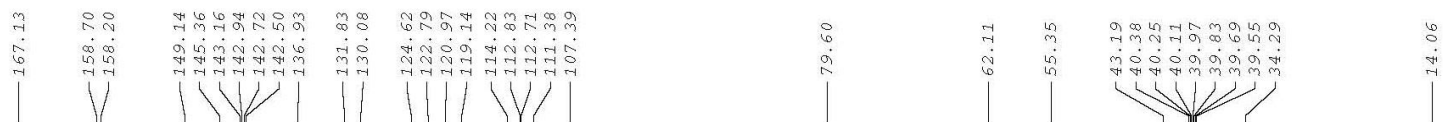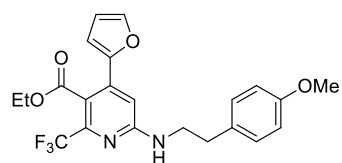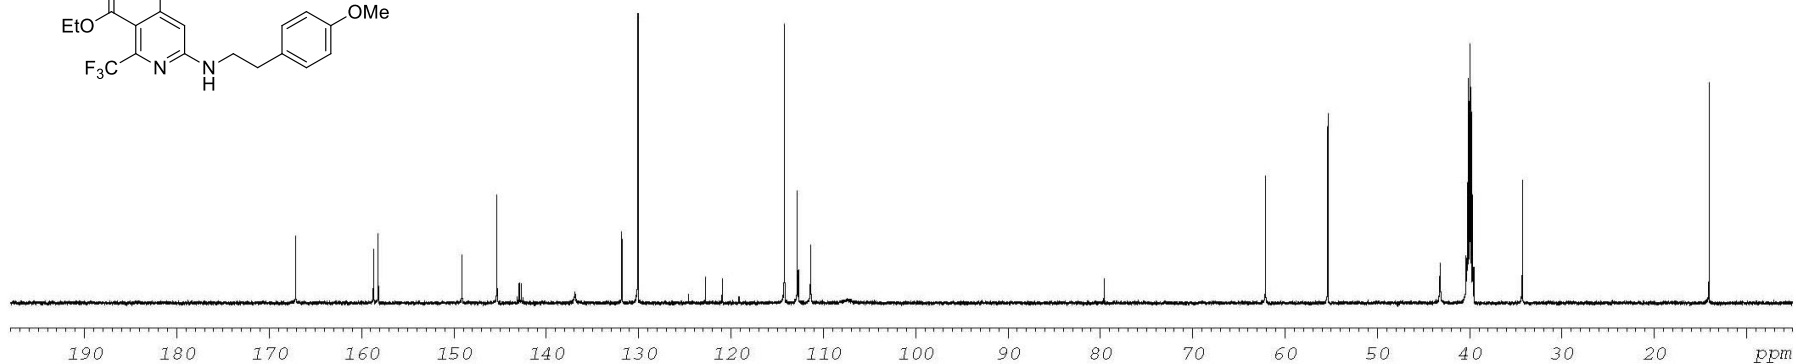

Figure S83.  $^{13}\text{C}$  NMR (150 MHz,  $\text{DMSO-}d_6$ ) spectra of compound **5w**

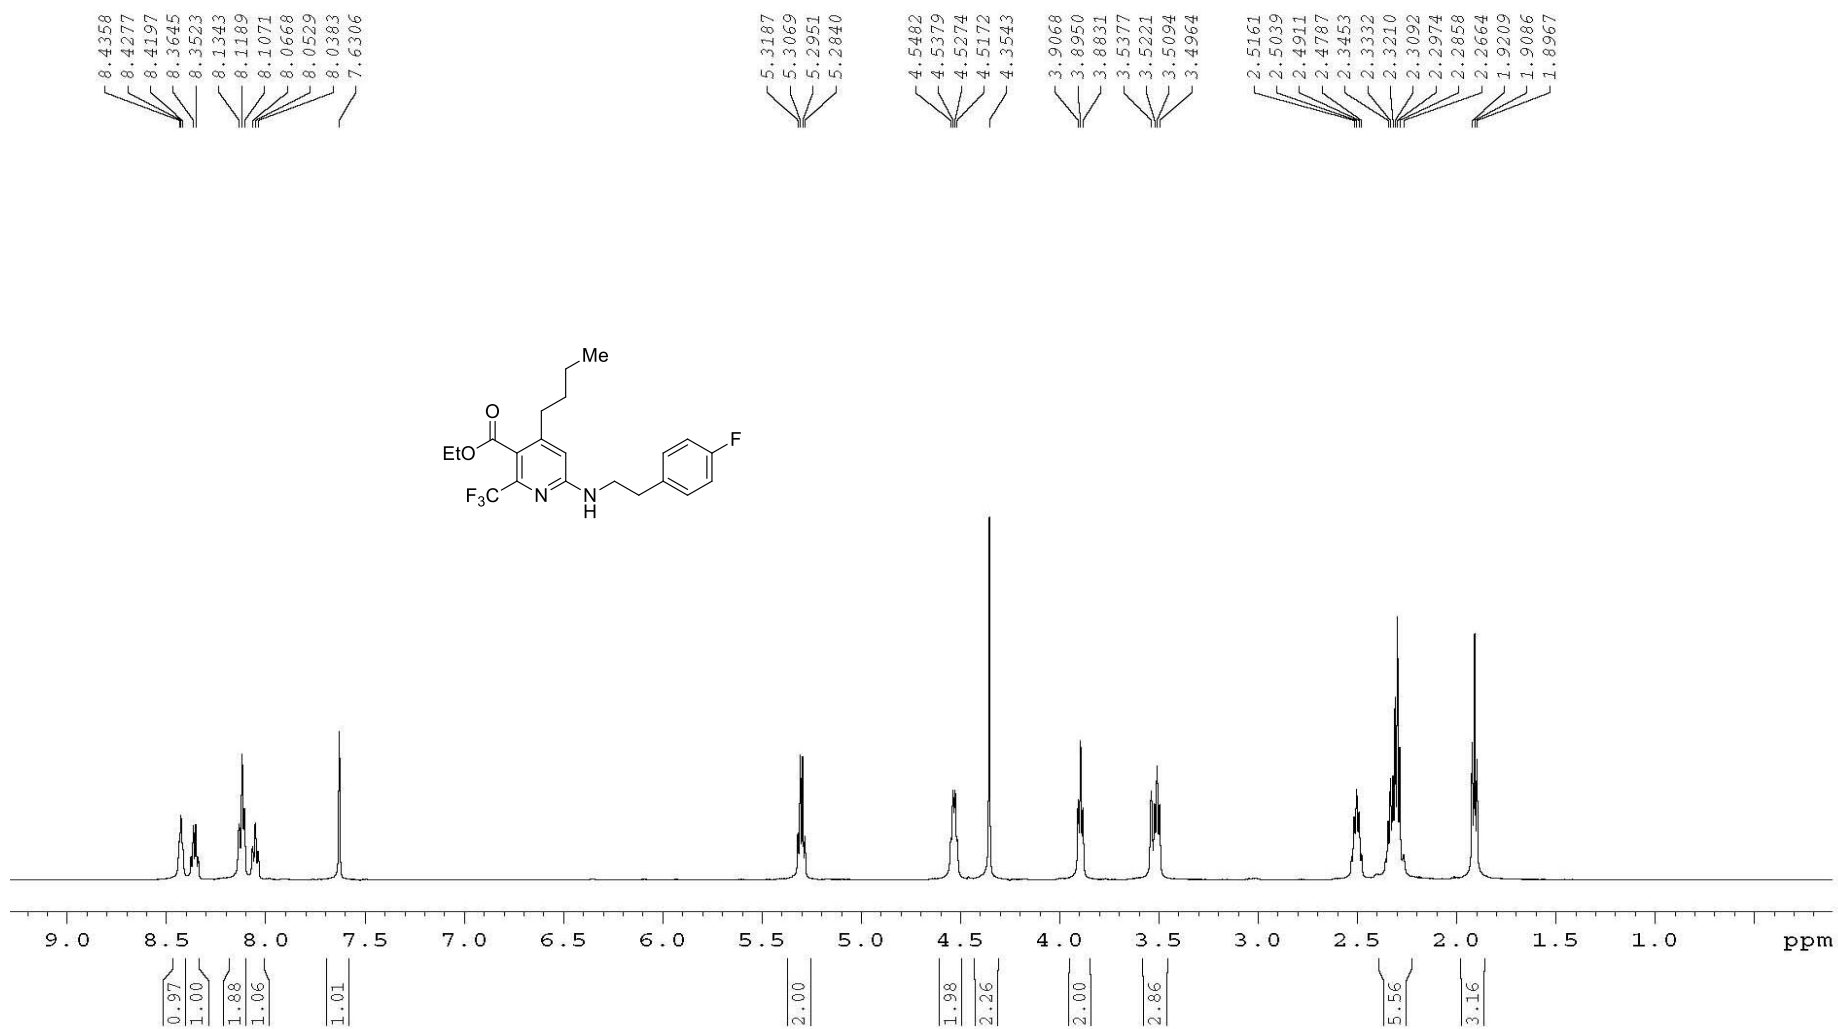

Figure S84. <sup>1</sup>H NMR (600 MHz, DMSO-*d*<sub>6</sub>) spectra of compound 5x

DEPT135

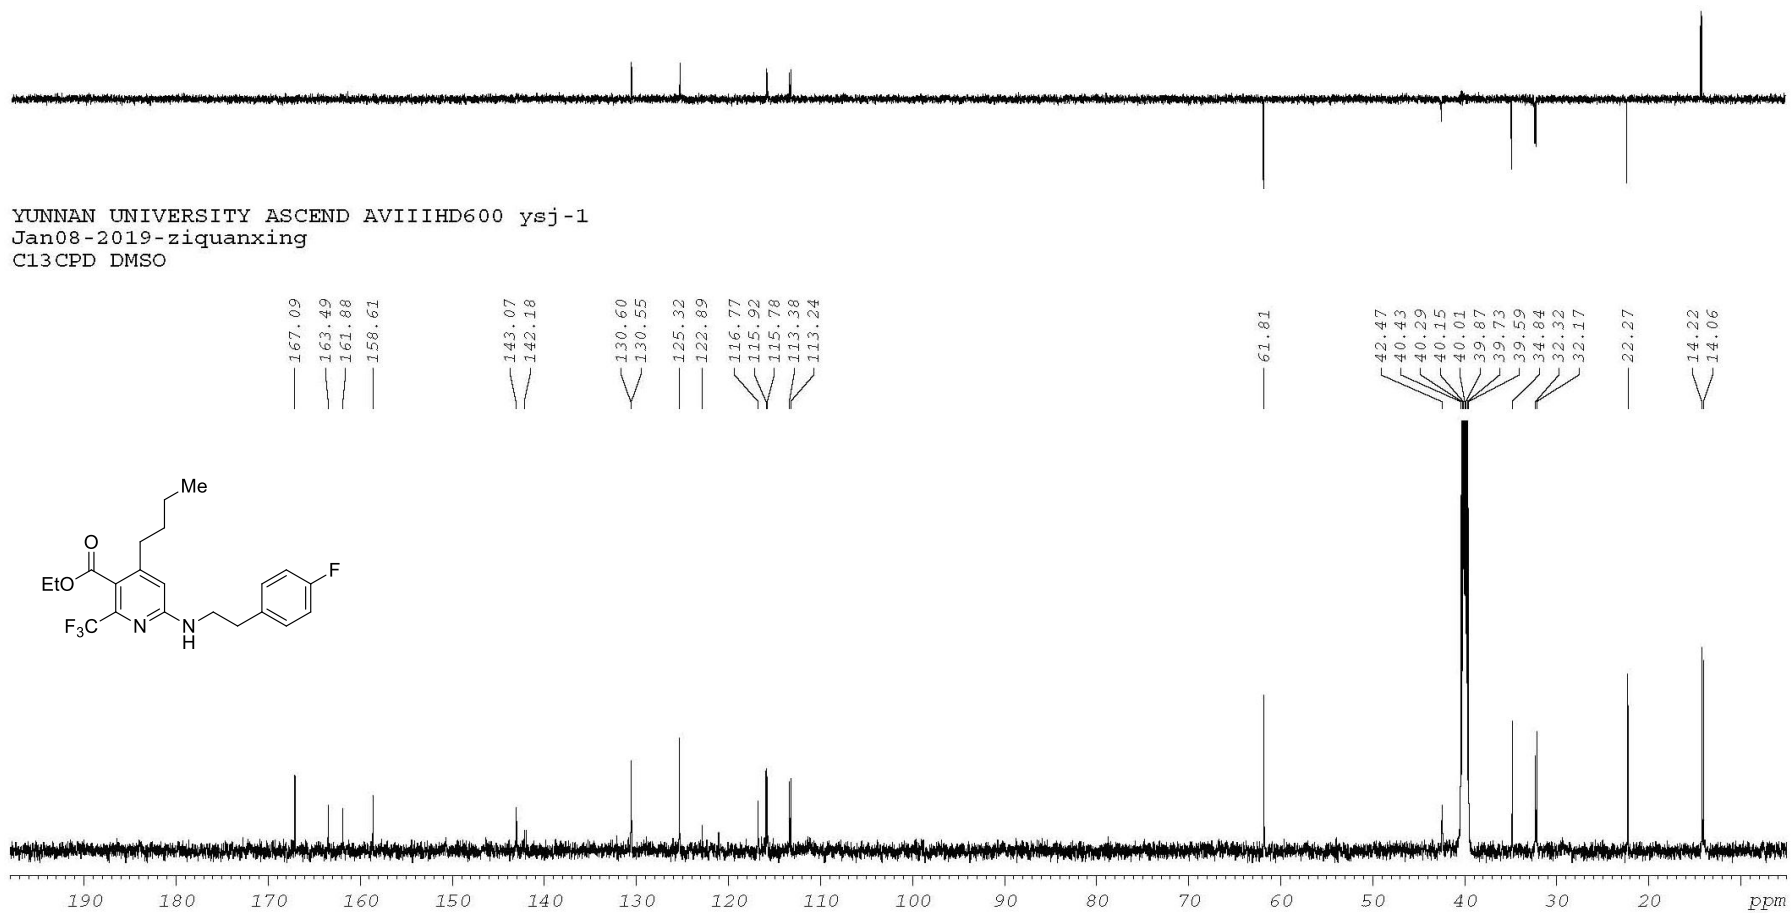

Figure S85.  $^{13}\text{C}$  NMR (150 MHz,  $\text{DMSO-}d_6$ ) spectra of compound 5x



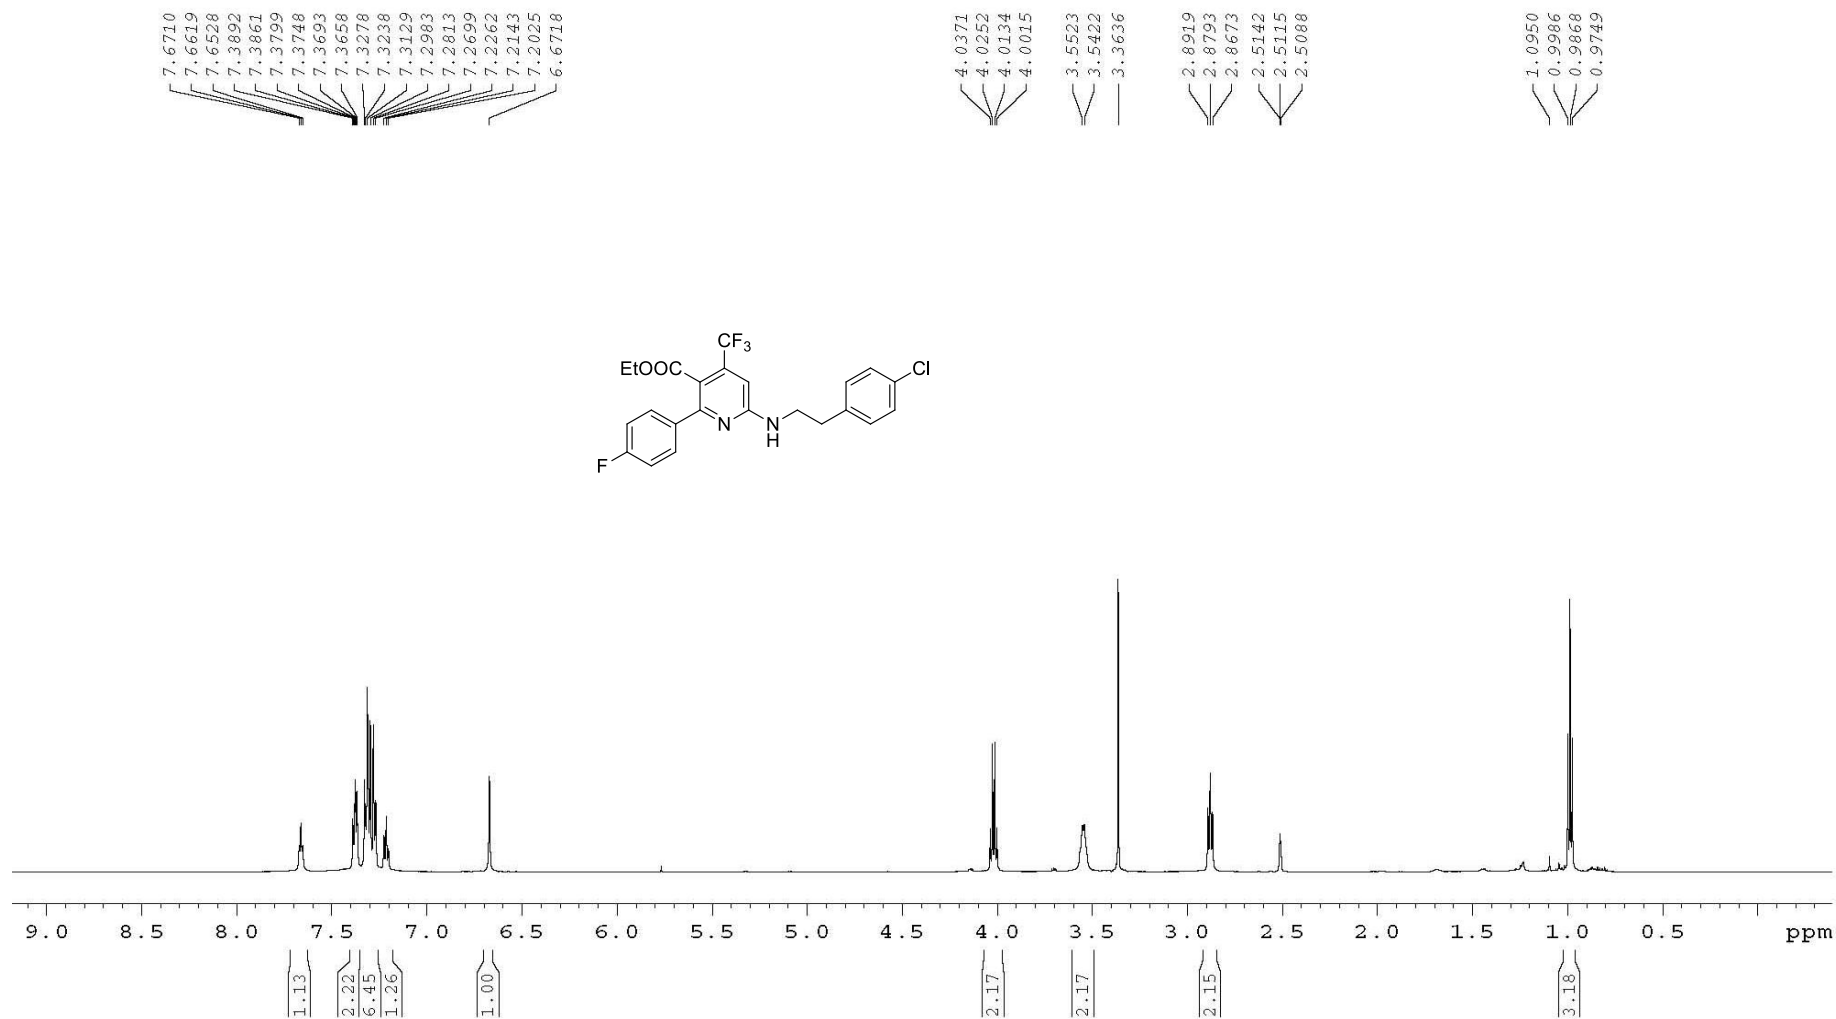

**Figure S86.**  $^1\text{H}$  NMR (600 MHz,  $\text{DMSO-}d_6$ ) spectra of compound **5f'**

DEPT135

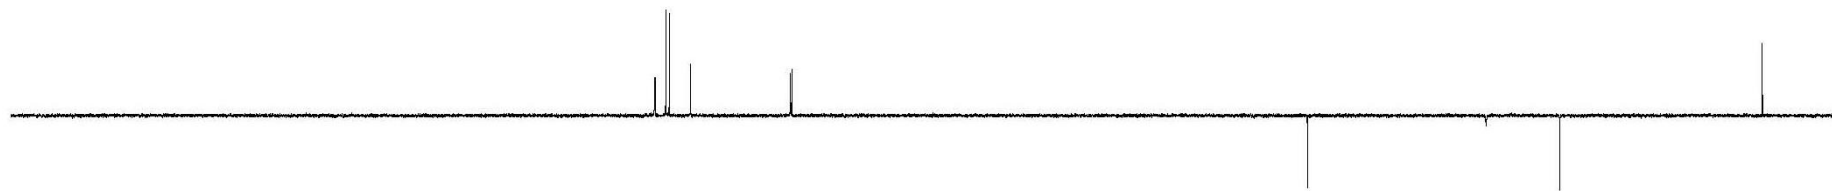

YUNNAN UNIVERSITY ASCEND AVIIIHD600 YSJ-12  
C13CPD DMSO

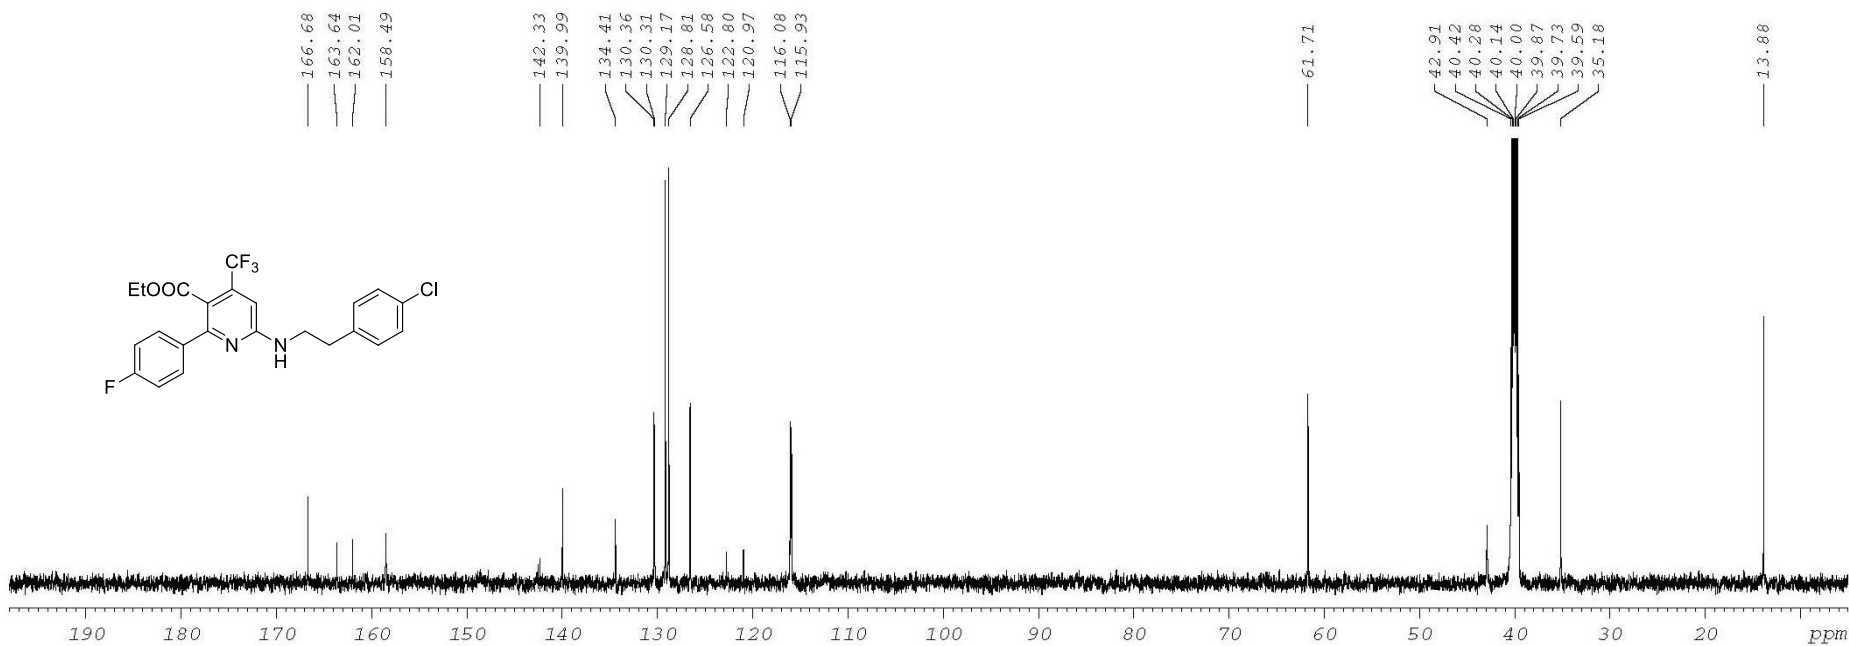

Figure S87. <sup>13</sup>C NMR (150MHz, DMSO-*d*<sub>6</sub>) spectra of compound 5f'

RT: 0.09 - 12.10

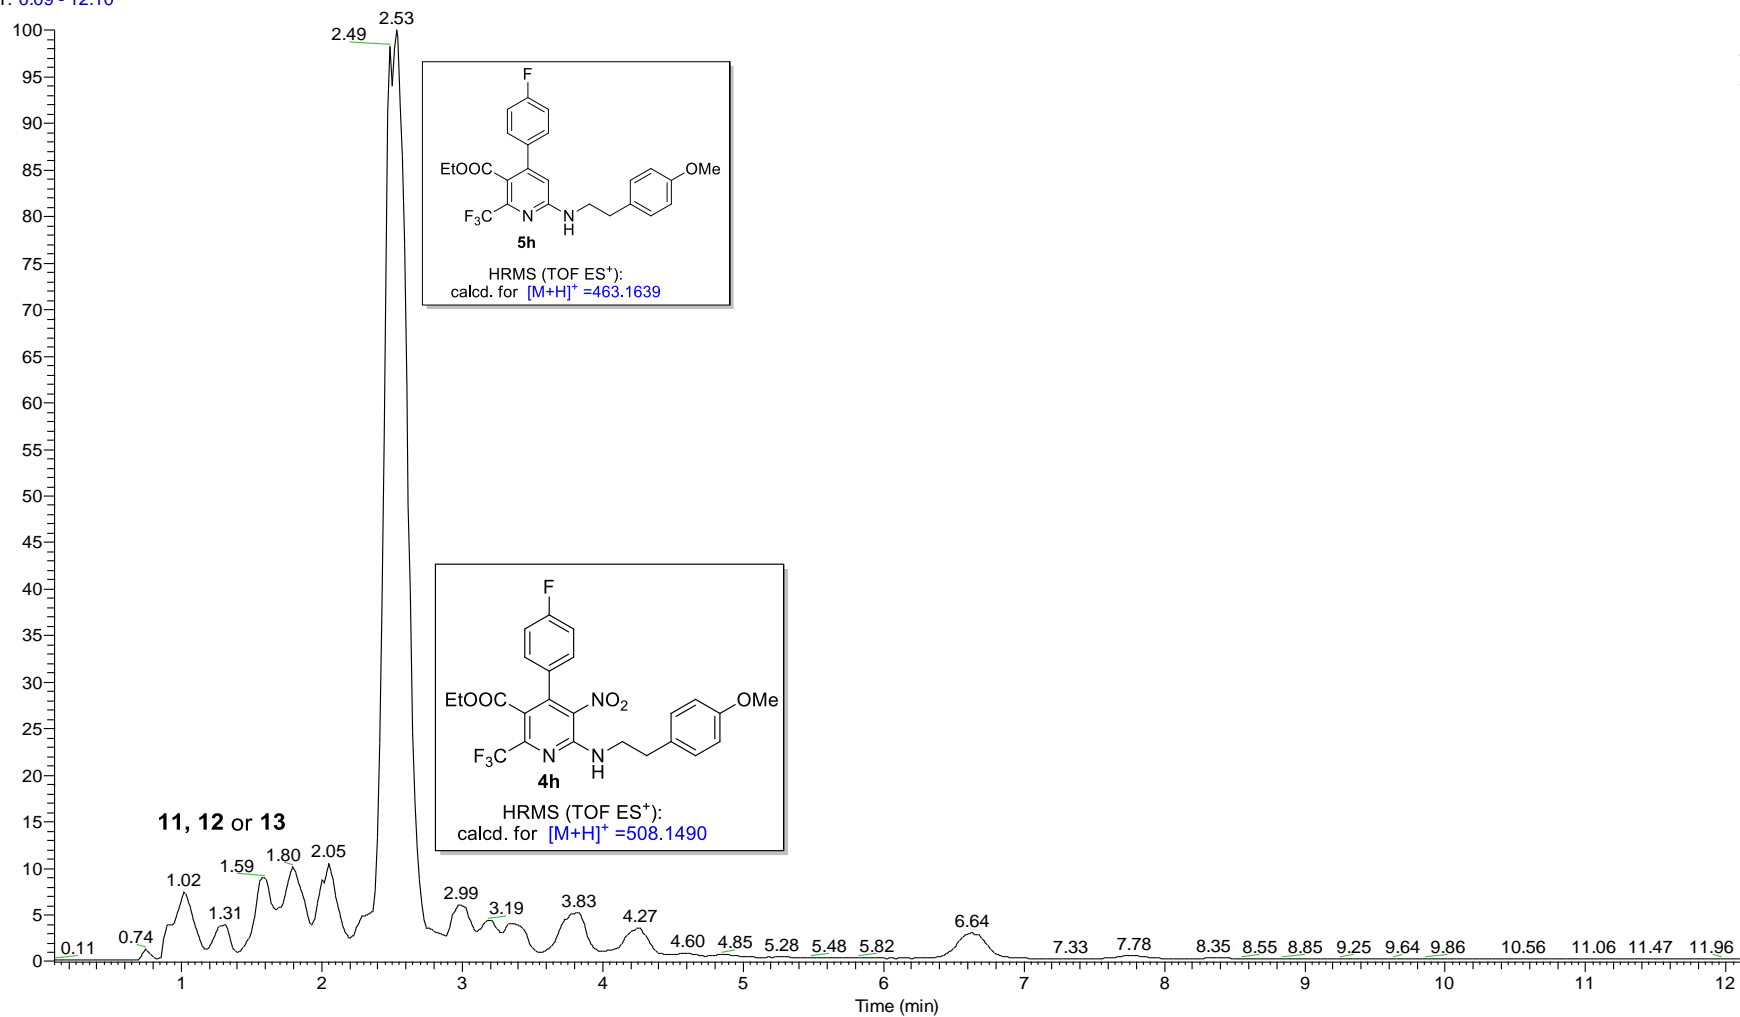

NL:  
3.29E8  
TIC MS  
ZIQUANXIA  
N-1

Figure S88. HPLC of the reaction mixture

ZIQUANXIAN-1 #66 RT: 1.33 AV: 1 NL: 2.55E6  
T: FTMS + c ESI Full ms [400.00-700.00]

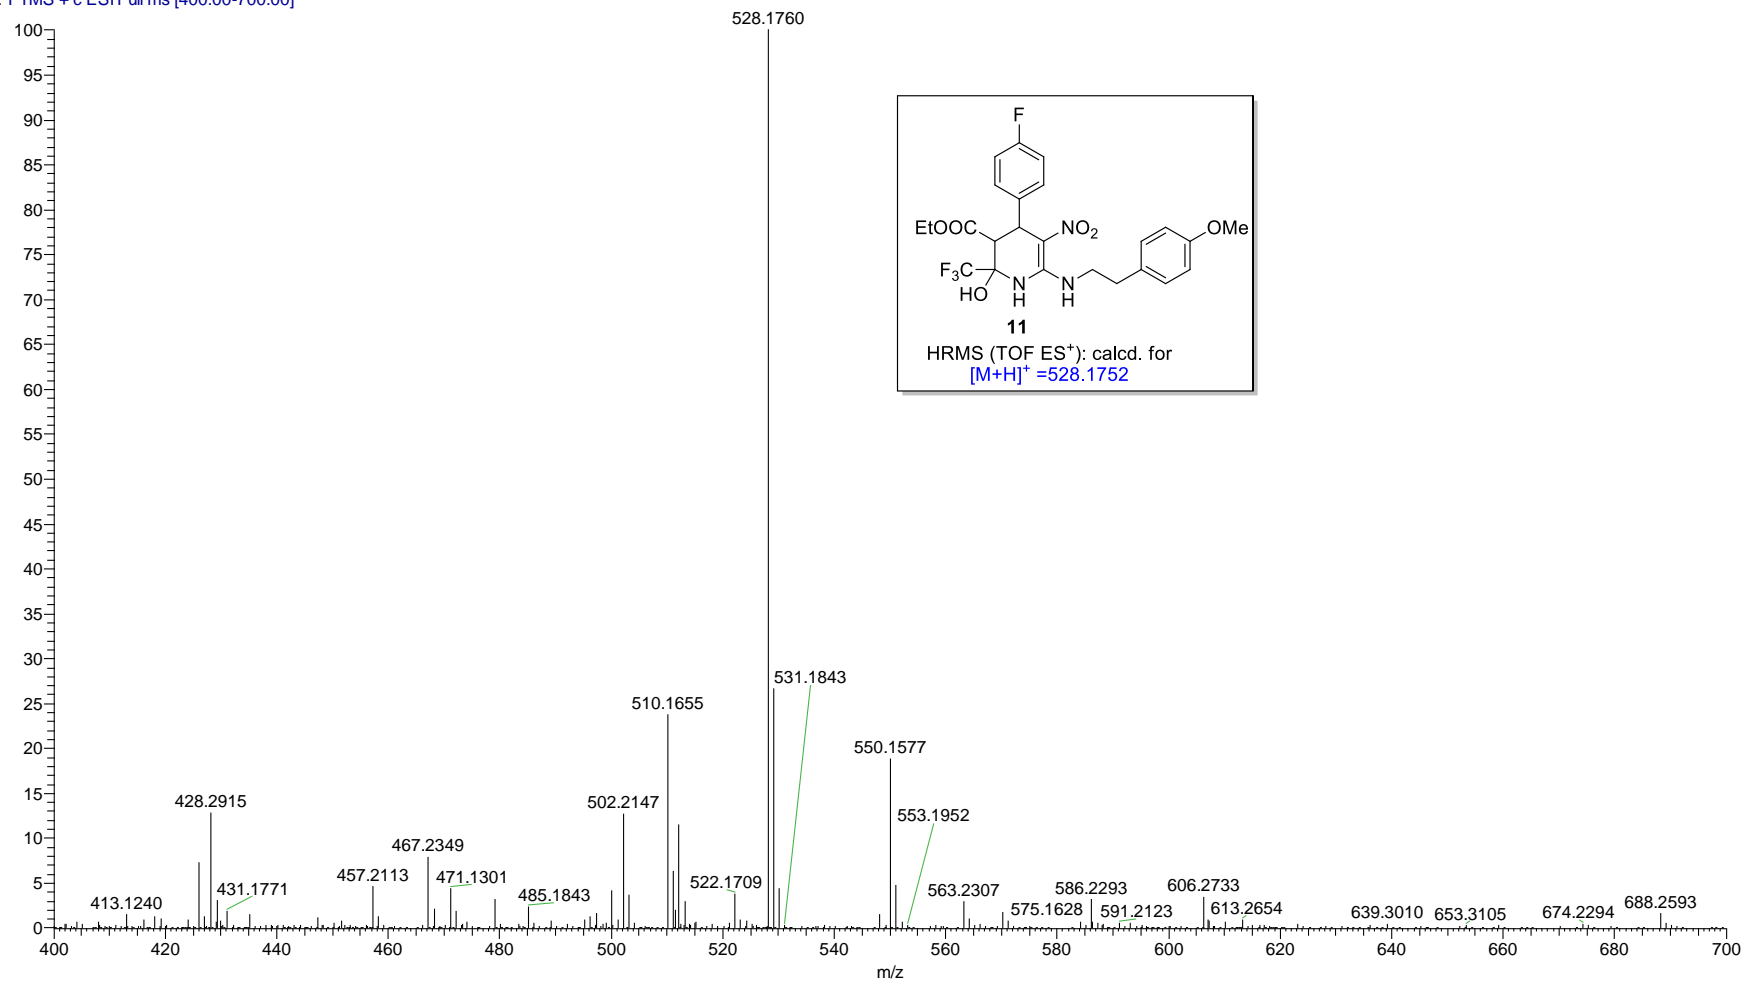

Figure S89. HRMS of intermediate 11

ZIQUANXIAN-1 #68 RT: 1.37 AV: 1 NL: 1.13E5  
T: FTMS + c ESI Full ms [400.00-700.00]

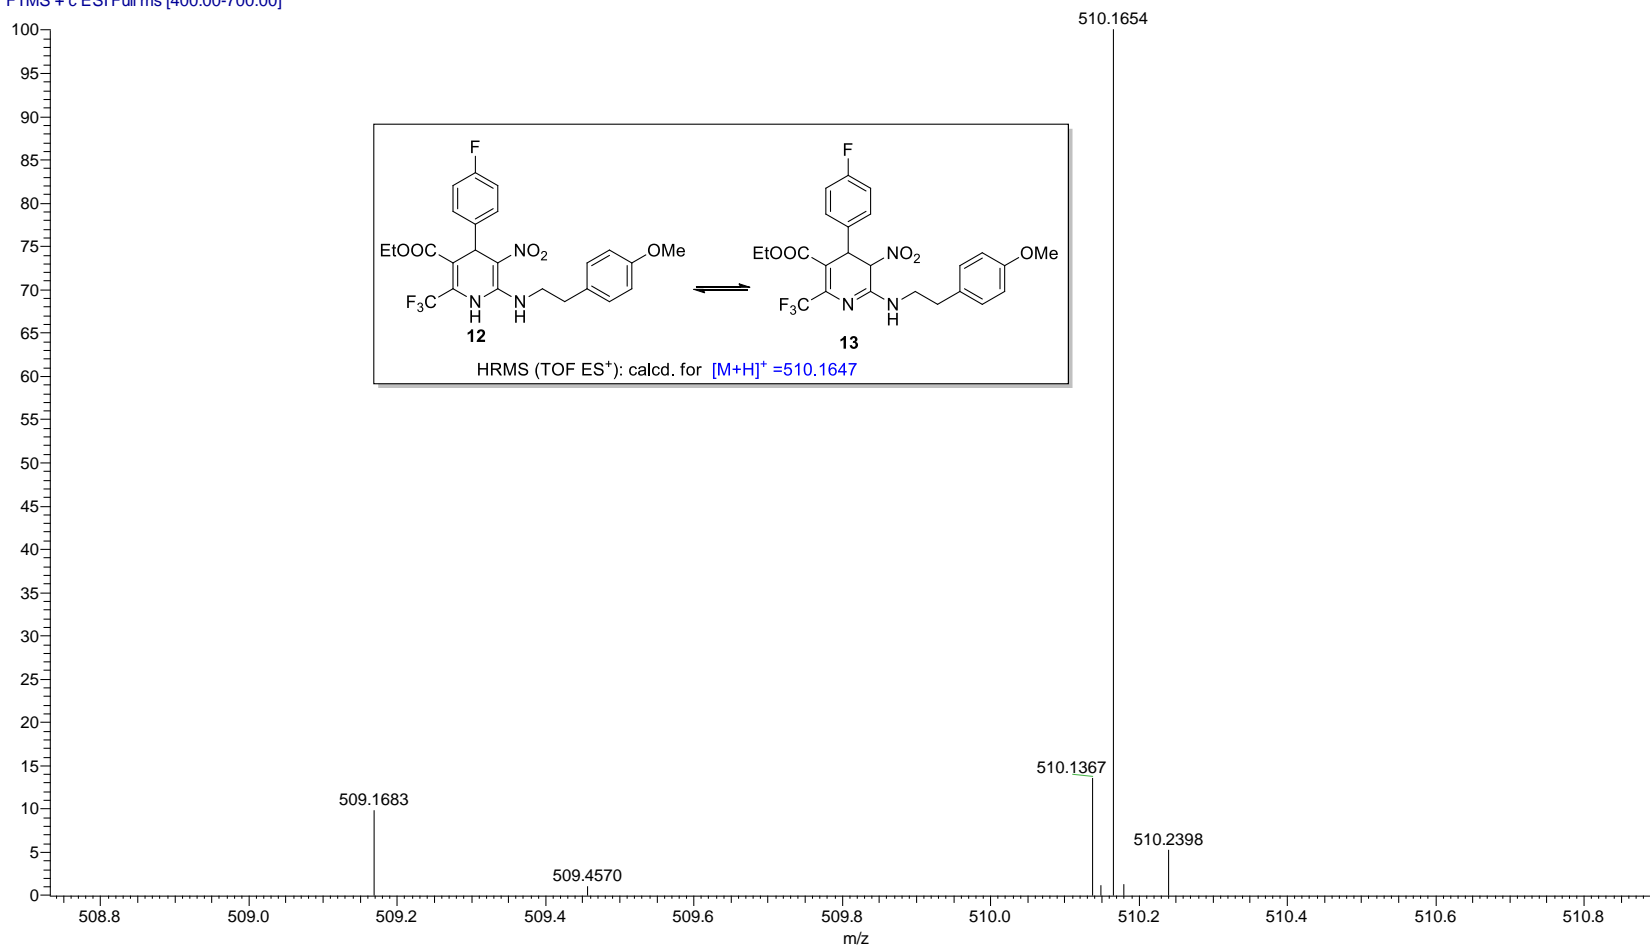

Figure S90. HRMS of intermediate 12/13

ZIQUANXIAN-1 #163 RT: 3.03 AV: 1 NL: 9.42E6  
T: FTMS + c ESI Full ms [400.00-700.00]

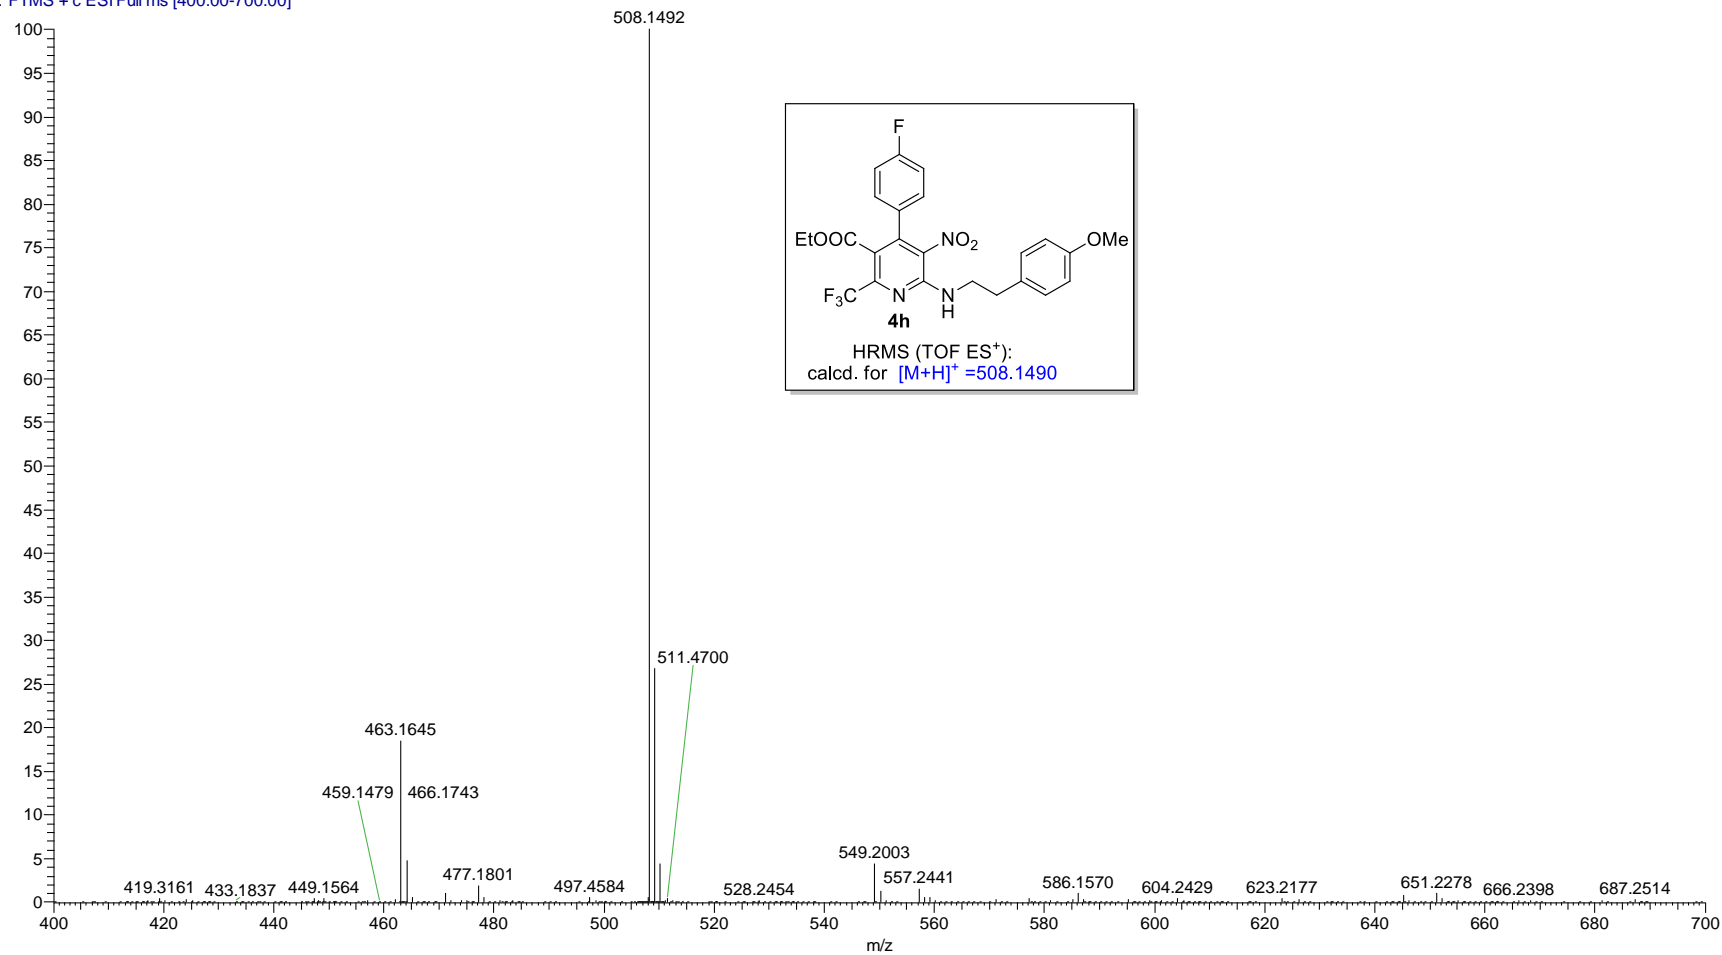

Figure S91. HRMS of compound 4h

ZIQUANXIAN-1 #133 RT: 2.50 AV: 1 NL: 2.07E8  
T: FTMS + c ESI Full ms [400.00-700.00]

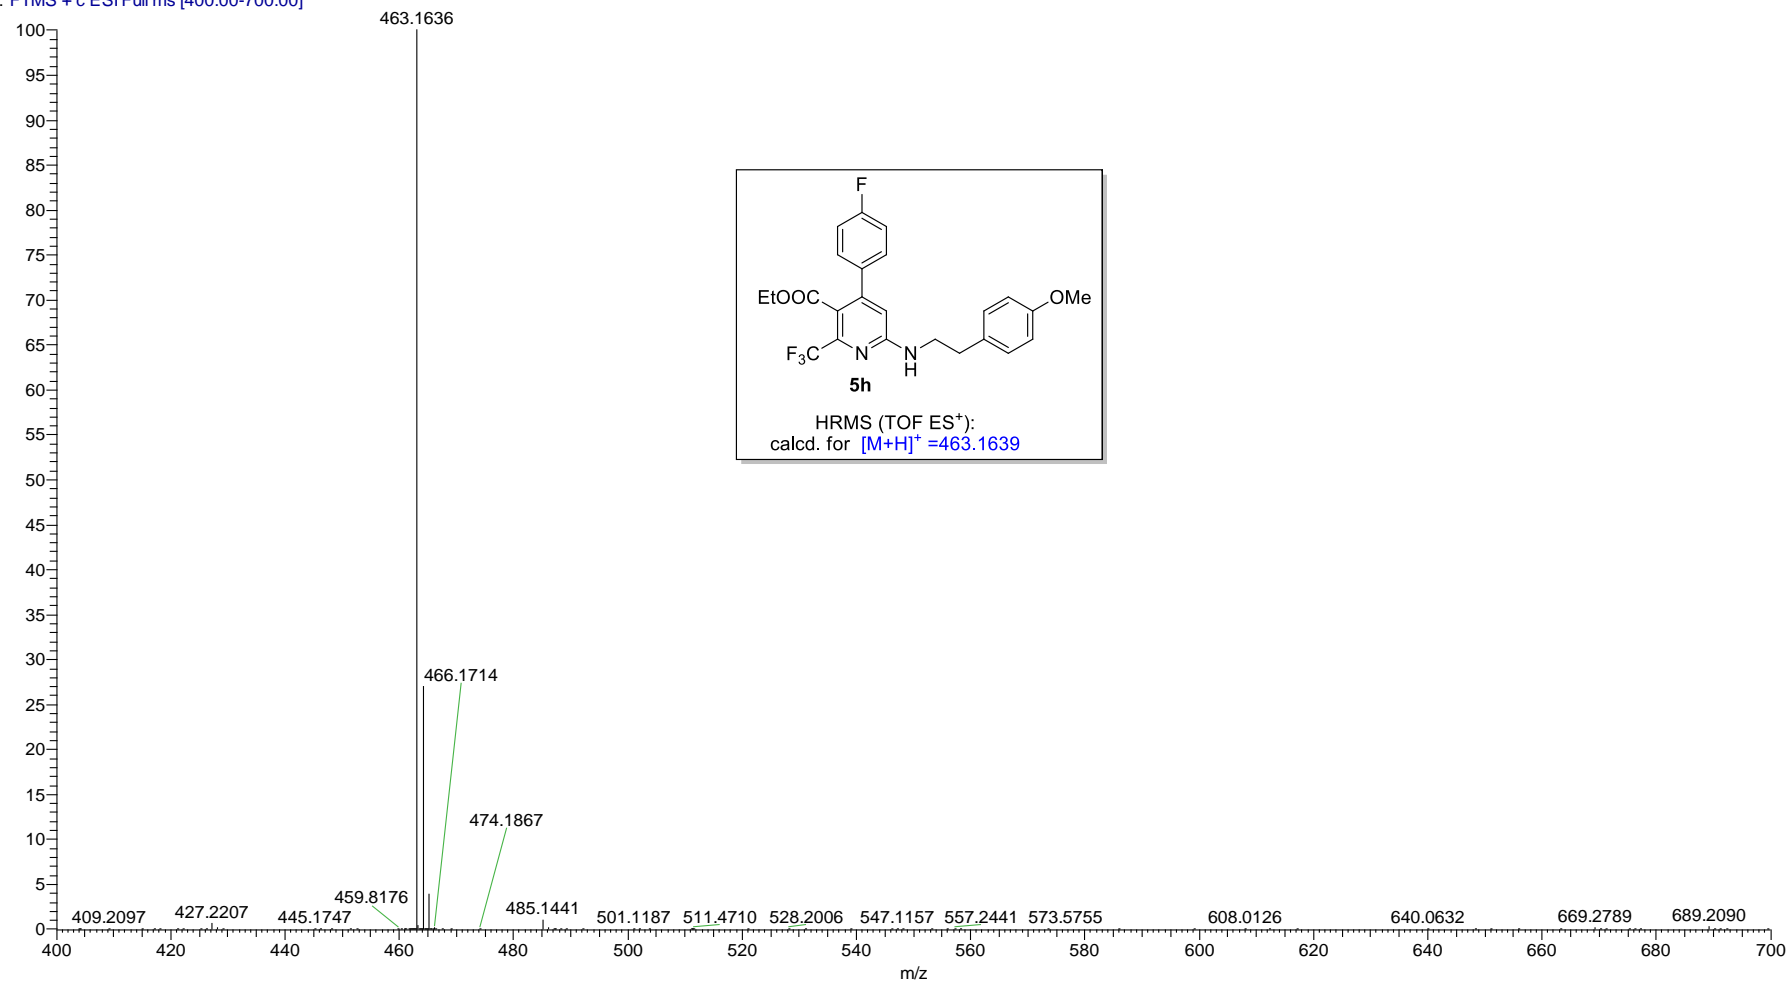

Figure S92. HRMS of compound **5h**
